# Supplementary material for: RNA profiling of laser microdissected human trophoblast subtypes at mid-gestation reveals a role for cannabinoid signaling in invasion
Source: Oxford University Press journal article supplement (doi:10.1242/dev.199626), 2021-09-24
Supplement: dev199626supp.pdf [file dev199626supp.pdf]

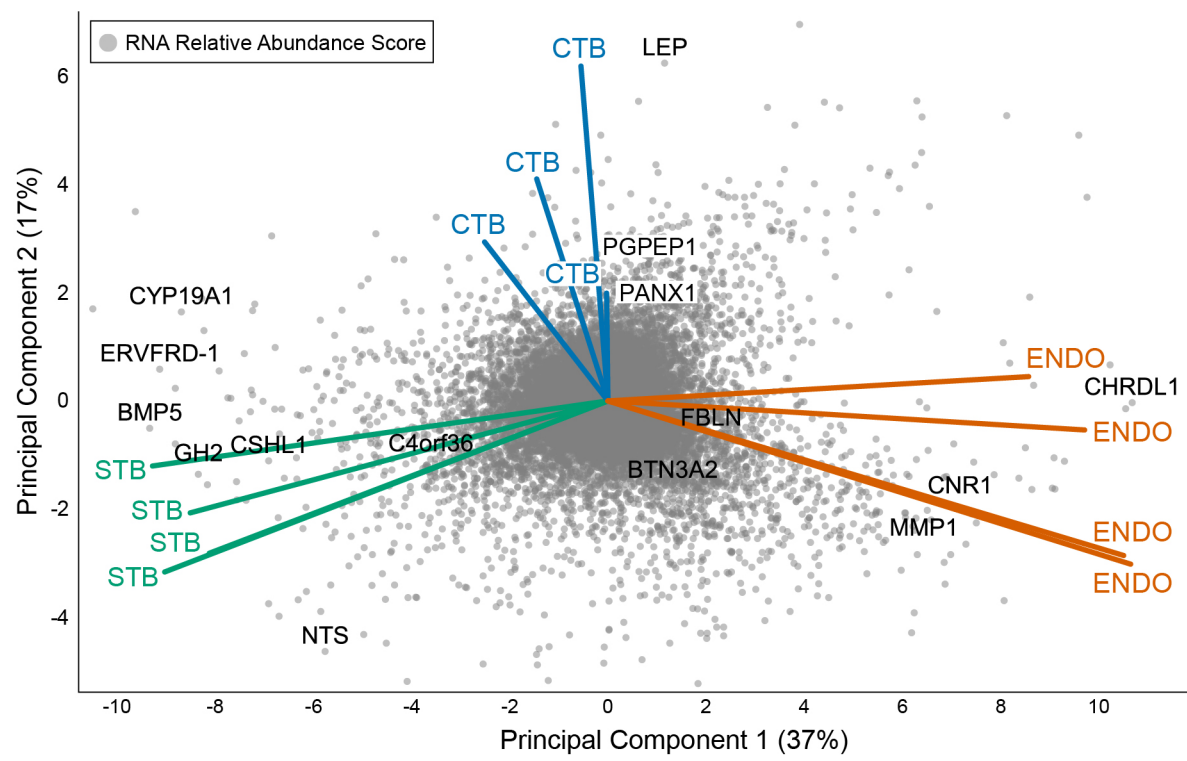

Fig. S1.

| S | C | E | Symbol       | Name                                                                            | Linear Fold Change |        |        |
|---|---|---|--------------|---------------------------------------------------------------------------------|--------------------|--------|--------|
|   |   |   |              |                                                                                 | S vs C             | S vs E | E vs C |
|   |   |   | ERVFRD-1     | endogenous retrovirus group FRD, member 1                                       | 3.5                | 77.7   | -21.9  |
|   |   |   | GH2          | growth hormone 2                                                                | 11.6               | 64.7   | -5.6   |
|   |   |   | SVEP1        | sushi, von Willebrand factor type A, EGF and pentraxin domain containing 1      | 9.3                | 57.8   | -6.2   |
|   |   |   | PLAC4        | placenta specific 4                                                             | 2.7                | 49.8   | -18.1  |
|   |   |   | KISS1        | KiSS-1 metastasis-suppressor                                                    | 9.0                | 44.5   | -4.9   |
|   |   |   | LGR5         | leucine-rich repeat containing G protein-coupled receptor 5                     | 8.1                | 41.2   | -5.1   |
|   |   |   | LOC100129935 | lectin, galactoside-binding, soluble, 14 pseudogene                             | 4.0                | 41.0   | -10.2  |
|   |   |   | LRP2         | LDL receptor related protein 2                                                  | 3.4                | 39.5   | -11.5  |
|   |   |   | TRPV6        | transient receptor potential cation channel, subfamily V, member 6              | 10.3               | 39.5   | -3.8   |
|   |   |   | INSL4        | insulin-like 4 (placenta)                                                       | 4.3                | 37.9   | -8.8   |
|   |   |   | PEG10        | paternally expressed 10                                                         | 2.3                | 34.2   | -15.0  |
|   |   |   | LINC00967    | long intergenic non-protein coding RNA 967                                      | 4.8                | 34.0   | -7.1   |
|   |   |   | DEPDC1B      | DEP domain containing 1B                                                        | 3.0                | 33.2   | -11.2  |
|   |   |   | CSHL1        | chorionic somatomammotropin hormone-like 1                                      | 6.6                | 30.7   | -4.7   |
|   |   |   | LCMT1-AS2    | LCMT1 antisense RNA 2                                                           | 4.0                | 29.6   | -7.4   |
|   |   |   | ANKRD20A5P   | ankyrin repeat domain 20 family, member A5, pseudogene                          | 8.0                | 27.7   | -3.5   |
|   |   |   | KMO          | kynurenine 3-monooxygenase (kynurenine 3-hydroxylase)                           | 5.4                | 26.6   | -5.0   |
|   |   |   | PSG8         | pregnancy specific beta-1-glycoprotein 8                                        | 5.4                | 26.5   | -4.9   |
|   |   |   | TCL6         | T-cell leukemia                                                                 | 3.6                | 24.3   | -6.8   |
|   |   |   | GABRE        | gamma-aminobutyric acid (GABA) A receptor, epsilon                              | 4.2                | 21.2   | -5.1   |
|   |   |   | LOC100128988 | uncharacterized LOC100128988                                                    | 4.4                | 21.1   | -4.8   |
|   |   |   | SEMA6A       | semaphorin 6A                                                                   | 4.4                | 18.5   | -4.2   |
|   |   |   | CRYBG1       | crystallin beta-gamma domain containing 1                                       | 3.3                | 18.2   | -5.5   |
|   |   |   | PSG9         | pregnancy specific beta-1-glycoprotein 9                                        | 4.2                | 17.3   | -4.1   |
|   |   |   | GPC3         | glypican 3                                                                      | 2.8                | 16.2   | -5.8   |
|   |   |   | LOC102724687 | uncharacterized LOC102724687                                                    | 3.8                | 15.7   | -4.1   |
|   |   |   | FAM184A      | family with sequence similarity 184, member A                                   | 2.1                | 15.0   | -7.3   |
|   |   |   | HSD17B1      | hydroxysteroid (17-beta) dehydrogenase 1                                        | 4.4                | 14.4   | -3.2   |
|   |   |   | PKIB         | protein kinase (cAMP-dependent, catalytic) inhibitor beta                       | 2.8                | 14.2   | -5.1   |
|   |   |   | ERV3-1       | endogenous retrovirus group 3, member 1                                         | 4.3                | 13.5   | -3.1   |
|   |   |   | MPP7         | membrane protein, palmitoylated 7                                               | 3.8                | 13.3   | -3.5   |
|   |   |   | EXPH5        | exophilin 5                                                                     | 2.4                | 13.3   | -5.6   |
|   |   |   | IGSF5        | immunoglobulin superfamily, member 5                                            | 3.4                | 12.1   | -3.6   |
|   |   |   | ABCG2        | ATP binding cassette subfamily G member 2 (Junior blood group)                  | 3.9                | 11.9   | -3.1   |
|   |   |   | SLC13A4      | solute carrier family 13 (sodium                                                | 5.2                | 11.8   | -2.3   |
|   |   |   | MICU3        | mitochondrial calcium uptake family, member 3                                   | 3.4                | 11.8   | -3.4   |
|   |   |   | SLC13A3      | solute carrier family 13 (sodium-dependent dicarboxylate transporter), member 3 | 3.5                | 11.2   | -3.2   |
|   |   |   | LINC00845    | long intergenic non-protein coding RNA 845                                      | 2.4                | 10.9   | -4.6   |
|   |   |   | HSD11B2      | hydroxysteroid (11-beta) dehydrogenase 2                                        | 3.8                | 10.9   | -2.9   |
|   |   |   | ESRRG        | estrogen-related receptor gamma                                                 | 2.9                | 10.8   | -3.7   |
|   |   |   | SLC43A2      | solute carrier family 43 (amino acid system L transporter), member 2            | 2.6                | 10.7   | -4.1   |
|   |   |   | LOC105370058 | uncharacterized LOC105370058                                                    | 3.0                | 10.4   | -3.5   |
|   |   |   | ANK3         | ankyrin 3, node of Ranvier (ankyrin G)                                          | 3.1                | 10.4   | -3.4   |
|   |   |   | LOC105369669 | uncharacterized LOC105369669                                                    | 3.3                | 10.4   | -3.2   |
|   |   |   | LOC105379298 | uncharacterized LOC105379298                                                    | 3.3                | 10.2   | -3.1   |
|   |   |   | TACC2        | transforming, acidic coiled-coil containing protein 2                           | 3.9                | 10.0   | -2.6   |
|   |   |   | PSG10P       | pregnancy specific beta-1-glycoprotein 10, pseudogene                           | 3.2                | 9.7    | -3.0   |
|   |   |   | SEMA6A-AS1   | SEMA6A antisense RNA 1                                                          | 3.2                | 9.5    | -2.9   |
|   |   |   | PLEKHA6      | pleckstrin homology domain containing, family A member 6                        | 2.9                | 9.3    | -3.2   |
|   |   |   | CKMT1B       | creatine kinase, mitochondrial 1B                                               | 2.8                | 9.0    | -3.2   |
|   |   |   | RYBP         | RING1 and YY1 binding protein                                                   | 2.1                | 8.3    | -4.0   |
|   |   |   | LOC255187    | uncharacterized LOC255187                                                       | 3.8                | 8.1    | -2.1   |
|   |   |   | MIR503HG     | MIR503 host gene                                                                | 3.1                | 7.9    | -2.6   |
|   |   |   | LOC105370057 | uncharacterized LOC105370057                                                    | 2.4                | 7.3    | -3.0   |
|   |   |   | ZFAT         | zinc finger and AT hook domain containing                                       | 2.2                | 7.2    | -3.3   |



| S | C | E | Symbol       | Name                                                                         | Linear Fold Change |        |        |
|---|---|---|--------------|------------------------------------------------------------------------------|--------------------|--------|--------|
|   |   |   |              |                                                                              | S vs C             | S vs E | E vs C |
|   |   |   | PLEKHH1      | pleckstrin homology domain containing, family H (with MyTH4 domain) member 1 | 2.7                | 7.1    | -2.6   |
|   |   |   | ARHGAP26     | Rho GTPase activating protein 26                                             | 3.1                | 7.0    | -2.3   |
|   |   |   | BPGM         | 2,3-bisphosphoglycerate mutase                                               | 2.9                | 6.8    | -2.4   |
|   |   |   | SLC22A3      | solute carrier family 22 (organic cation transporter), member 3              | 2.4                | 6.7    | -2.8   |
|   |   |   | NHSL1        | NHS-like 1                                                                   | 2.5                | 6.6    | -2.6   |
|   |   |   | PSG3         | pregnancy specific beta-1-glycoprotein 3                                     | 2.1                | 6.1    | -2.9   |
|   |   |   | GGH          | gamma-glutamyl hydrolase (conjugase, folypolyglutamy hydrolase)              | 2.5                | 6.1    | -2.4   |
|   |   |   | LOC105377029 | uncharacterized LOC105377029                                                 | 2.6                | 6.0    | -2.3   |
|   |   |   | SIAH1        | siah E3 ubiquitin protein ligase 1                                           | 2.7                | 5.9    | -2.2   |
|   |   |   | POGLUT3      | protein O-glucosyltransferase 3                                              | 2.5                | 5.6    | -2.3   |
|   |   |   | TBX3         | T-box 3                                                                      | 2.5                | 5.2    | -2.1   |
|   |   |   | GULP1        | GULP, engulfment adaptor PTB domain containing 1                             | 2.2                | 5.2    | -2.3   |
|   |   |   | NECTIN3      | nectin cell adhesion molecule 3                                              | 2.2                | 5.2    | -2.4   |
|   |   |   | KDM7A        | lysine (K)-specific demethylase 7A                                           | 2.5                | 5.1    | -2.0   |
|   |   |   | GRIP1        | glutamate receptor interacting protein 1                                     | 2.1                | 4.9    | -2.3   |
|   |   |   | ACADL        | acyl-CoA dehydrogenase, long chain                                           | 2.3                | 4.8    | -2.1   |
|   |   |   | MAN1C1       | mannosidase, alpha, class 1C, member 1                                       | 2.1                | 4.7    | -2.3   |
|   |   |   | ADRB1        | adrenoceptor beta 1                                                          | 2.1                | 4.7    | -2.2   |
|   |   |   | CAP2         | CAP, adenylate cyclase-associated protein, 2 (yeast)                         | 2.1                | 4.7    | -2.2   |
|   |   |   | LNPEP        | leucyl                                                                       | 2.3                | 4.6    | -2.0   |
|   |   |   | DUSP16       | dual specificity phosphatase 16                                              | 2.1                | 4.3    | -2.1   |
|   |   |   | TMEM150C     | transmembrane protein 150C                                                   | 12.7               | 2.6    | 4.9    |
|   |   |   | GUCY1B1      | guanylate cyclase 1 soluble subunit beta 1                                   | 10.9               | 2.5    | 4.3    |
|   |   |   | FAM162B      | family with sequence similarity 162, member B                                | 9.2                | 3.6    | 2.5    |
|   |   |   | KL           | klotho                                                                       | 8.4                | 3.4    | 2.5    |
|   |   |   | DACH1        | dachshund family transcription factor 1                                      | 6.5                | 2.9    | 2.3    |
|   |   |   | FSTL3        | follistatin-like 3 (secreted glycoprotein)                                   | -38.5              | -14.2  | -2.7   |
|   |   |   | SLC2A3       | solute carrier family 2 (facilitated glucose transporter), member 3          | -9.5               | -2.3   | -4.1   |
|   |   |   | ZNF486       | zinc finger protein 486                                                      | -7.4               | -2.8   | -2.7   |
|   |   |   | SLCO4A1      | solute carrier organic anion transporter family, member 4A1                  | -7.0               | -2.6   | -2.7   |
|   |   |   | CLDN19       | claudin 19                                                                   | -5.5               | -2.3   | -2.4   |
|   |   |   | CXCR6        | chemokine (C-X-C motif) receptor 6                                           | -5.1               | -2.0   | -2.5   |
|   |   |   | IL1RAP       | interleukin 1 receptor accessory protein                                     | -5.0               | -2.2   | -2.3   |
|   |   |   | SYT11        | synaptotagmin XI                                                             | 2.2                | -4.3   | 9.4    |
|   |   |   | HDGFL3       | HDGF like 3                                                                  | 2.4                | -2.4   | 5.8    |
|   |   |   | CHRD1        | chordin-like 1                                                               | -8.7               | -191.1 | 22.0   |
|   |   |   | PRL          | prolactin                                                                    | -10.3              | -150.8 | 14.7   |
|   |   |   | HLA-DRA      | major histocompatibility complex, class II, DR alpha                         | -7.8               | -74.8  | 9.6    |
|   |   |   | RORB         | RAR-related orphan receptor B                                                | -4.1               | -63.4  | 15.7   |
|   |   |   | IL1RL1       | interleukin 1 receptor-like 1                                                | -7.3               | -59.9  | 8.2    |
|   |   |   | IFI44L       | interferon-induced protein 44-like                                           | -3.4               | -31.5  | 9.1    |
|   |   |   | GKN1         | gastrokine 1                                                                 | -8.3               | -29.7  | 3.6    |
|   |   |   | F2R          | coagulation factor II (thrombin) receptor                                    | -4.2               | -23.1  | 5.5    |
|   |   |   | GPRC5B       | G protein-coupled receptor, class C, group 5, member B                       | -2.3               | -9.2   | 4.0    |
|   |   |   | TMEM45A      | transmembrane protein 45A                                                    | -2.1               | -8.5   | 4.1    |
|   |   |   | PDE6H        | phosphodiesterase 6H, cGMP-specific, cone, gamma                             | -2.5               | -6.2   | 2.4    |
|   |   |   | AREG         | amphiregulin                                                                 | 15.4               | 34.9   | ns     |
|   |   |   | SLC27A2      | solute carrier family 27 (fatty acid transporter), member 2                  | 18.4               | 31.6   | ns     |
|   |   |   | SCN7A        | sodium channel, voltage gated, type VII alpha subunit                        | 15.9               | 25.0   | ns     |
|   |   |   | NTS          | neurotensin                                                                  | 23.3               | 21.1   | ns     |
|   |   |   | MEOX2        | mesenchyme homeobox 2                                                        | 17.0               | 23.2   | ns     |
|   |   |   | SLC26A7      | solute carrier family 26 (anion exchanger), member 7                         | 11.3               | 21.1   | ns     |
|   |   |   | LOC105375166 | uncharacterized LOC105375166                                                 | 19.4               | 20.4   | ns     |
|   |   |   | SH3TC2       | SH3 domain and tetratricopeptide repeats 2                                   | 5.7                | 18.2   | ns     |
|   |   |   | APLNR        | apelin receptor                                                              | 18.1               | 14.2   | ns     |

| S | C | E | Symbol       | Name                                                                                     | Linear Fold Change |        |        |
|---|---|---|--------------|------------------------------------------------------------------------------------------|--------------------|--------|--------|
|   |   |   |              |                                                                                          | S vs C             | S vs E | E vs C |
|   |   |   | CPS1         | carbamoyl-phosphate synthase 1                                                           | 15.0               | 18.0   | ns     |
|   |   |   | PLA2G2A      | phospholipase A2, group IIA (platelets, synovial fluid)                                  | 8.5                | 17.5   | ns     |
|   |   |   | MIR4713      | microRNA 4713                                                                            | 4.3                | 16.9   | ns     |
|   |   |   | GSTA3        | glutathione S-transferase alpha 3                                                        | 6.2                | 16.5   | ns     |
|   |   |   | SNORD113-4   | small nucleolar RNA, C                                                                   | 5.7                | 16.2   | ns     |
|   |   |   | LOC105372578 | uncharacterized LOC105372578                                                             | 10.8               | 15.2   | ns     |
|   |   |   | LOC105369382 | uncharacterized LOC105369382                                                             | 6.6                | 15.0   | ns     |
|   |   |   | P2RY1        | purinergic receptor P2Y, G-protein coupled, 1                                            | 13.8               | 9.1    | ns     |
|   |   |   | SNORD113-5   | small nucleolar RNA, C                                                                   | 6.3                | 13.1   | ns     |
|   |   |   | LOC101927482 | uncharacterized LOC101927482                                                             | 12.7               | 7.7    | ns     |
|   |   |   | LINC00474    | long intergenic non-protein coding RNA 474                                               | 9.0                | 12.6   | ns     |
|   |   |   | HIGD1B       | HIG1 hypoxia inducible domain family, member 1B                                          | 12.2               | 8.4    | ns     |
|   |   |   | USP27X       | ubiquitin specific peptidase 27, X-linked                                                | 4.7                | 11.9   | ns     |
|   |   |   | ABCB1        | ATP binding cassette subfamily B member 1                                                | 11.7               | 11.0   | ns     |
|   |   |   | SNORD113-1   | small nucleolar RNA, C                                                                   | 6.9                | 11.4   | ns     |
|   |   |   | TTPA         | tocopherol (alpha) transfer protein                                                      | 8.4                | 11.3   | ns     |
|   |   |   | AGTR1        | angiotensin II receptor, type 1                                                          | 7.1                | 10.7   | ns     |
|   |   |   | LOC730101    | uncharacterized LOC730101                                                                | 6.9                | 10.7   | ns     |
|   |   |   | ZNF554       | zinc finger protein 554                                                                  | 4.1                | 10.6   | ns     |
|   |   |   | MUCL1        | mucin-like 1                                                                             | 10.1               | 9.9    | ns     |
|   |   |   | ISM1-AS1     | ISM1 antisense RNA 1                                                                     | 4.3                | 9.9    | ns     |
|   |   |   | GNGT1        | guanine nucleotide binding protein (G protein), gamma transducing activity polypeptide 1 | 4.1                | 9.8    | ns     |
|   |   |   | SMAGP        | small cell adhesion glycoprotein                                                         | 5.4                | 9.7    | ns     |
|   |   |   | ENDOU        | endonuclease, polyU-specific                                                             | 5.2                | 9.6    | ns     |
|   |   |   | CRISPLD1     | cysteine-rich secretory protein LCCL domain containing 1                                 | 8.7                | 9.6    | ns     |
|   |   |   | MIR181B1     | microRNA 181b-1                                                                          | 5.1                | 9.6    | ns     |
|   |   |   | LOC100128386 | uncharacterized LOC100128386                                                             | 5.4                | 9.5    | ns     |
|   |   |   | COX4I2       | cytochrome c oxidase subunit IV isoform 2 (lung)                                         | 9.5                | 8.5    | ns     |
|   |   |   | LOC100129345 | uncharacterized LOC100129345                                                             | 4.8                | 9.2    | ns     |
|   |   |   | SNHG24       | small nucleolar RNA host gene 24                                                         | 5.7                | 9.0    | ns     |
|   |   |   | PHYHIPL      | phytanoyl-CoA 2-hydroxylase interacting protein-like                                     | 5.3                | 8.9    | ns     |
|   |   |   | SNORD114-31  | small nucleolar RNA, C                                                                   | 3.5                | 8.9    | ns     |
|   |   |   | HSD17B2      | hydroxysteroid (17-beta) dehydrogenase 2                                                 | 8.8                | 4.1    | ns     |
|   |   |   | ADAMTS19     | ADAM metalloproteinase with thrombospondin type 1 motif 19                               | 8.6                | 4.0    | ns     |
|   |   |   | PCDH11X      | protocadherin 11 X-linked                                                                | 8.5                | 6.3    | ns     |
|   |   |   | CRHBP        | corticotropin releasing hormone binding protein                                          | 8.4                | 5.5    | ns     |
|   |   |   | IL22RA2      | interleukin 22 receptor, alpha 2                                                         | 4.9                | 8.3    | ns     |
|   |   |   | ZNF91        | zinc finger protein 91                                                                   | 5.1                | 8.2    | ns     |
|   |   |   | FRAS1        | Fraser extracellular matrix complex subunit 1                                            | 5.4                | 8.0    | ns     |
|   |   |   | COLEC10      | collectin sub-family member 10 (C-type lectin)                                           | 6.4                | 7.9    | ns     |
|   |   |   | EGFEM1P      | EGF-like and EMI domain containing 1, pseudogene                                         | 7.7                | 6.8    | ns     |
|   |   |   | GCNT4        | glucosaminyl (N-acetyl) transferase 4, core 2                                            | 7.7                | 5.1    | ns     |
|   |   |   | TRIM40       | tripartite motif containing 40                                                           | 3.6                | 7.7    | ns     |
|   |   |   | TBX5         | T-box 5                                                                                  | 5.5                | 7.7    | ns     |
|   |   |   | LOC105376429 | uncharacterized LOC105376429                                                             | 3.1                | 7.0    | ns     |
|   |   |   | LINC01336    | long intergenic non-protein coding RNA 1336                                              | 6.9                | 6.1    | ns     |
|   |   |   | RAB38        | RAB38, member RAS oncogene family                                                        | 6.8                | 3.8    | ns     |
|   |   |   | EPHA3        | EPH receptor A3                                                                          | 5.3                | 6.7    | ns     |
|   |   |   | SNORD114-28  | small nucleolar RNA, C                                                                   | 6.3                | 6.7    | ns     |
|   |   |   | MINDY4B      | MINDY family member 4B                                                                   | 3.4                | 6.6    | ns     |
|   |   |   | LOC100507661 | uncharacterized LOC100507661                                                             | 5.7                | 6.5    | ns     |
|   |   |   | SLC6A4       | solute carrier family 6 (neurotransmitter transporter), member 4                         | 4.1                | 6.4    | ns     |
|   |   |   | CLRN1        | clarin 1                                                                                 | 3.9                | 6.3    | ns     |
|   |   |   | MAP7D2       | MAP7 domain containing 2                                                                 | 3.6                | 6.3    | ns     |
|   |   |   | MIR181A1HG   | MIR181A1 host gene                                                                       | 4.0                | 6.3    | ns     |

| S | C | E | Symbol       | Name                                                                    | Linear Fold Change |        |        |
|---|---|---|--------------|-------------------------------------------------------------------------|--------------------|--------|--------|
|   |   |   |              |                                                                         | S vs C             | S vs E | E vs C |
|   |   |   | MTMR10       | myotubularin related protein 10                                         | 3.7                | 6.2    | ns     |
|   |   |   | LINC01118    | long intergenic non-protein coding RNA 1118                             | 3.1                | 6.2    | ns     |
|   |   |   | ACSS1        | acyl-CoA synthetase short-chain family member 1                         | 4.5                | 6.1    | ns     |
|   |   |   | C4orf36      | chromosome 4 open reading frame 36                                      | 3.5                | 6.1    | ns     |
|   |   |   | LINC02365    | long intergenic non-protein coding RNA 2365                             | 4.0                | 6.1    | ns     |
|   |   |   | CCDC102B     | coiled-coil domain containing 102B                                      | 6.1                | 3.8    | ns     |
|   |   |   | ADAMTS18     | ADAM metalloproteinase with thrombospondin type 1 motif 18              | 4.5                | 5.9    | ns     |
|   |   |   | MED12L       | mediator complex subunit 12 like                                        | 3.2                | 5.9    | ns     |
|   |   |   | AFF2         | AF4                                                                     | 5.8                | 5.7    | ns     |
|   |   |   | HSPA4L       | heat shock 70kDa protein 4-like                                         | 5.2                | 5.8    | ns     |
|   |   |   | AHR          | aryl hydrocarbon receptor                                               | 3.5                | 5.8    | ns     |
|   |   |   | NRCAM        | neuronal cell adhesion molecule                                         | 5.7                | 3.7    | ns     |
|   |   |   | SLC20A1      | solute carrier family 20 (phosphate transporter), member 1              | 3.8                | 5.7    | ns     |
|   |   |   | HS6ST2       | heparan sulfate 6-O-sulfotransferase 2                                  | 4.9                | 5.7    | ns     |
|   |   |   | SERPINB2     | serpin peptidase inhibitor, clade B (ovalbumin), member 2               | 5.0                | 5.6    | ns     |
|   |   |   | CROT         | camitine O-octanoyltransferase                                          | 2.9                | 5.6    | ns     |
|   |   |   | FAM3B        | family with sequence similarity 3, member B                             | 3.1                | 5.4    | ns     |
|   |   |   | TCHH         | trichohyalin                                                            | 2.7                | 5.4    | ns     |
|   |   |   | MEG3         | maternally expressed 3 (non-protein coding)                             | 2.9                | 5.4    | ns     |
|   |   |   | SLC16A12     | solute carrier family 16, member 12                                     | 4.2                | 5.3    | ns     |
|   |   |   | CADM3        | cell adhesion molecule 3                                                | 4.0                | 5.3    | ns     |
|   |   |   | PMAIP1       | phorbol-12-myristate-13-acetate-induced protein 1                       | 3.0                | 5.3    | ns     |
|   |   |   | LOC105375161 | uncharacterized LOC105375161                                            | 4.0                | 5.3    | ns     |
|   |   |   | ARHGAP42     | Rho GTPase activating protein 42                                        | 5.3                | 4.9    | ns     |
|   |   |   | IGHA1        | immunoglobulin heavy constant alpha 1                                   | 5.0                | 5.2    | ns     |
|   |   |   | WNT2         | wingless-type MMTV integration site family member 2                     | 3.0                | 5.2    | ns     |
|   |   |   | FLJ90680     | FLJ90680 protein                                                        | 3.7                | 5.1    | ns     |
|   |   |   | VXN          | vexin                                                                   | 3.2                | 5.1    | ns     |
|   |   |   | TMEM133      | transmembrane protein 133                                               | 4.2                | 5.0    | ns     |
|   |   |   | GPR183       | G protein-coupled receptor 183                                          | 5.0                | 3.2    | ns     |
|   |   |   | AGPAT5       | 1-acylglycerol-3-phosphate O-acyltransferase 5                          | 4.1                | 5.0    | ns     |
|   |   |   | TWIST1       | twist family bHLH transcription factor 1                                | 4.5                | 5.0    | ns     |
|   |   |   | ISM1         | isthmin 1, angiogenesis inhibitor                                       | 3.8                | 4.9    | ns     |
|   |   |   | LOC101927139 | uncharacterized LOC101927139                                            | 4.9                | 3.4    | ns     |
|   |   |   | MIR181A1     | microRNA 181a-1                                                         | 4.9                | 4.6    | ns     |
|   |   |   | SEMA3B       | semaphorin 3B                                                           | 3.2                | 4.8    | ns     |
|   |   |   | PART1        | prostate androgen-regulated transcript 1 (non-protein coding)           | 3.3                | 4.8    | ns     |
|   |   |   | PTPRD        | protein tyrosine phosphatase, receptor type, D                          | 4.8                | 3.4    | ns     |
|   |   |   | OTOGL        | otogelin-like                                                           | 3.3                | 4.8    | ns     |
|   |   |   | CSTA         | cystatin A (stefin A)                                                   | 4.8                | 4.6    | ns     |
|   |   |   | NRAD1        | non-coding RNA in the aldehyde dehydrogenase 1A pathway                 | 3.8                | 4.8    | ns     |
|   |   |   | MPP1         | membrane protein, palmitoylated 1                                       | 4.8                | 3.6    | ns     |
|   |   |   | AFF1         | AF4                                                                     | 2.6                | 4.7    | ns     |
|   |   |   | ITGA9        | integrin alpha 9                                                        | 4.7                | 2.7    | ns     |
|   |   |   | BLID         | BH3-like motif containing, cell death inducer                           | 3.9                | 4.7    | ns     |
|   |   |   | SEL1L3       | sel-1 suppressor of lin-12-like 3 (C. elegans)                          | 4.7                | 3.1    | ns     |
|   |   |   | ARHGAP28     | Rho GTPase activating protein 28                                        | 4.7                | 4.3    | ns     |
|   |   |   | CKMT1A       | creatine kinase, mitochondrial 1A                                       | 3.1                | 4.6    | ns     |
|   |   |   | RFX6         | regulatory factor X, 6                                                  | 4.6                | 4.6    | ns     |
|   |   |   | SNORD114-25  | small nucleolar RNA, C                                                  | 3.9                | 4.6    | ns     |
|   |   |   | MYLIP        | myosin regulatory light chain interacting protein                       | 2.5                | 4.6    | ns     |
|   |   |   | CCK          | cholecystokinin                                                         | 3.0                | 4.6    | ns     |
|   |   |   | HACE1        | HECT domain and ankyrin repeat containing E3 ubiquitin protein ligase 1 | 3.3                | 4.5    | ns     |
|   |   |   | CADM3-AS1    | CADM3 antisense RNA 1                                                   | 3.3                | 4.5    | ns     |
|   |   |   | PRKCZ        | protein kinase C, zeta                                                  | 2.6                | 4.5    | ns     |

| S | C | E | Symbol       | Name                                                                          | Linear Fold Change |        |        |
|---|---|---|--------------|-------------------------------------------------------------------------------|--------------------|--------|--------|
|   |   |   |              |                                                                               | S vs C             | S vs E | E vs C |
|   |   |   | SH3BGRL2     | SH3 domain binding glutamate-rich protein like 2                              | 3.1                | 4.5    | ns     |
|   |   |   | FRMD6        | FERM domain containing 6                                                      | 3.6                | 4.5    | ns     |
|   |   |   | MIR30A       | microRNA 30a                                                                  | 2.8                | 4.5    | ns     |
|   |   |   | USP46        | ubiquitin specific peptidase 46                                               | 3.0                | 4.5    | ns     |
|   |   |   | PIP5K1       | diphosphoinositol pentakisphosphate kinase 1                                  | 3.0                | 4.5    | ns     |
|   |   |   | LRP8         | LDL receptor related protein 8                                                | 2.7                | 4.5    | ns     |
|   |   |   | GATM         | glycine amidinotransferase (L-arginine:glycine amidinotransferase)            | 4.4                | 2.8    | ns     |
|   |   |   | SCNN1B       | sodium channel, non voltage gated 1 beta subunit                              | 4.0                | 4.4    | ns     |
|   |   |   | DYSF         | dysferlin                                                                     | 4.1                | 4.4    | ns     |
|   |   |   | GSTA4        | glutathione S-transferase alpha 4                                             | 2.5                | 4.4    | ns     |
|   |   |   | ANXA6        | annexin A6                                                                    | 3.2                | 4.4    | ns     |
|   |   |   | SLC26A2      | solute carrier family 26 (anion exchanger), member 2                          | 2.9                | 4.4    | ns     |
|   |   |   | CA8          | carbonic anhydrase VIII                                                       | 4.3                | 3.3    | ns     |
|   |   |   | LINC01119    | long intergenic non-protein coding RNA 1119                                   | 4.3                | 4.3    | ns     |
|   |   |   | PLAGL1       | pleiomorphic adenoma gene-like 1                                              | 4.3                | 3.2    | ns     |
|   |   |   | GS1-594A7.3  | uncharacterized LOC104798195                                                  | 4.2                | 3.6    | ns     |
|   |   |   | CHN1         | chimerin 1                                                                    | 4.2                | 3.6    | ns     |
|   |   |   | ADHFE1       | alcohol dehydrogenase, iron containing 1                                      | 2.7                | 4.2    | ns     |
|   |   |   | MCOLN3       | mucolipin 3                                                                   | 3.4                | 4.1    | ns     |
|   |   |   | PAPPA-AS2    | PAPPA antisense RNA 2                                                         | 3.0                | 4.1    | ns     |
|   |   |   | LOC101927354 | uncharacterized LOC101927354                                                  | 2.9                | 4.1    | ns     |
|   |   |   | KANK1        | KN motif and ankyrin repeat domains 1                                         | 3.9                | 4.0    | ns     |
|   |   |   | IQGAP2       | IQ motif containing GTPase activating protein 2                               | 4.0                | 3.2    | ns     |
|   |   |   | MIR4659A     | microRNA 4659a                                                                | 4.0                | 4.0    | ns     |
|   |   |   | LINC00472    | long intergenic non-protein coding RNA 472                                    | 4.0                | 2.4    | ns     |
|   |   |   | HSPB8        | heat shock 22kDa protein 8                                                    | 2.0                | 4.0    | ns     |
|   |   |   | ANKH         | ANKH inorganic pyrophosphate transport regulator                              | 4.0                | 2.4    | ns     |
|   |   |   | MIR30C2      | microRNA 30c-2                                                                | 3.4                | 4.0    | ns     |
|   |   |   | PLEKHG1      | pleckstrin homology domain containing, family G (with RhoGef domain) member 1 | 4.0                | 2.4    | ns     |
|   |   |   | COLEC12      | collectin sub-family member 12                                                | 4.0                | 3.9    | ns     |
|   |   |   | ELF5         | E74-like factor 5 (ets domain transcription factor)                           | 2.9                | 4.0    | ns     |
|   |   |   | ATP6V0A4     | ATPase, H <sup>+</sup> transporting, lysosomal V0 subunit a4                  | 2.8                | 4.0    | ns     |
|   |   |   | FAM171B      | family with sequence similarity 171, member B                                 | 3.3                | 4.0    | ns     |
|   |   |   | OR2F1        | olfactory receptor, family 2, subfamily F, member 1 (gene                     | 2.7                | 3.9    | ns     |
|   |   |   | GALNT11      | polypeptide N-acetylgalactosaminyltransferase 11                              | 3.3                | 3.9    | ns     |
|   |   |   | LOC105370312 | uncharacterized LOC105370312                                                  | 3.1                | 3.9    | ns     |
|   |   |   | CNTN5        | contactin 5                                                                   | 3.9                | 3.9    | ns     |
|   |   |   | SYT7         | synaptotagmin VII                                                             | 2.1                | 3.9    | ns     |
|   |   |   | MIR3120      | microRNA 3120                                                                 | 3.9                | 3.5    | ns     |
|   |   |   | CDH3         | cadherin 3, type 1, P-cadherin (placental)                                    | 2.7                | 3.9    | ns     |
|   |   |   | LINC00597    | long intergenic non-protein coding RNA 597                                    | 3.8                | 3.2    | ns     |
|   |   |   | MPP5         | membrane protein, palmitoylated 5                                             | 2.7                | 3.8    | ns     |
|   |   |   | LOC105378239 | uncharacterized LOC105378239                                                  | 3.5                | 3.8    | ns     |
|   |   |   | ANKFN1       | ankyrin-repeat and fibronectin type III domain containing 1                   | 3.1                | 3.8    | ns     |
|   |   |   | TGFB3        | transforming growth factor beta 3                                             | 3.3                | 3.8    | ns     |
|   |   |   | GRB14        | growth factor receptor bound protein 14                                       | 3.8                | 3.3    | ns     |
|   |   |   | CARD18       | caspase recruitment domain family, member 18                                  | 2.4                | 3.7    | ns     |
|   |   |   | SERINC5      | serine incorporator 5                                                         | 2.0                | 3.7    | ns     |
|   |   |   | ISL1         | ISL LIM homeobox 1                                                            | 2.8                | 3.7    | ns     |
|   |   |   | LOC101929325 | uncharacterized LOC101929325                                                  | 2.7                | 3.7    | ns     |
|   |   |   | CEP85        | centrosomal protein 85kDa                                                     | 2.2                | 3.7    | ns     |
|   |   |   | CLRN1-AS1    | CLRN1 antisense RNA 1                                                         | 2.2                | 3.6    | ns     |
|   |   |   | LRP6         | LDL receptor related protein 6                                                | 3.6                | 2.3    | ns     |
|   |   |   | PLCXD2-AS1   | PLCXD2 antisense RNA 1                                                        | 2.6                | 3.6    | ns     |
|   |   |   | TMEM88       | transmembrane protein 88                                                      | 3.6                | 3.6    | ns     |



| S | C | E | Symbol       | Name                                                                 | Linear Fold Change |        |        |
|---|---|---|--------------|----------------------------------------------------------------------|--------------------|--------|--------|
|   |   |   |              |                                                                      | S vs C             | S vs E | E vs C |
|   |   |   | INTS6L       | integrator complex subunit 6 like                                    | 3.5                | 2.5    | ns     |
|   |   |   | FUT9         | fucosyltransferase 9 (alpha (1,3) fucosyltransferase)                | 3.1                | 3.5    | ns     |
|   |   |   | ARL4C        | ADP-ribosylation factor like GTPase 4C                               | 2.4                | 3.5    | ns     |
|   |   |   | CDKL5        | cyclin-dependent kinase-like 5                                       | 2.0                | 3.5    | ns     |
|   |   |   | SORBS1       | sorbin and SH3 domain containing 1                                   | 2.8                | 3.5    | ns     |
|   |   |   | NCMAP        | noncompact myelin associated protein                                 | 2.8                | 3.5    | ns     |
|   |   |   | CD99P1       | CD99 molecule pseudogene 1                                           | 2.7                | 3.4    | ns     |
|   |   |   | PNP          | purine nucleoside phosphorylase                                      | 3.4                | 3.2    | ns     |
|   |   |   | TFCP2L1      | transcription factor CP2-like 1                                      | 3.1                | 3.4    | ns     |
|   |   |   | ARHGAP17     | Rho GTPase activating protein 17                                     | 3.3                | 3.4    | ns     |
|   |   |   | CECR2        | cat eye syndrome chromosome region, candidate 2                      | 2.1                | 3.4    | ns     |
|   |   |   | GABRA3       | gamma-aminobutyric acid (GABA) A receptor, alpha 3                   | 3.2                | 3.3    | ns     |
|   |   |   | LOC105378032 | uncharacterized LOC105378032                                         | 2.9                | 3.3    | ns     |
|   |   |   | PPP1R14C     | protein phosphatase 1, regulatory (inhibitor) subunit 14C            | 2.2                | 3.3    | ns     |
|   |   |   | MAPK4        | mitogen-activated protein kinase 4                                   | 3.3                | 3.1    | ns     |
|   |   |   | NOSTRIN      | nitric oxide synthase trafficking                                    | 3.3                | 3.2    | ns     |
|   |   |   | C2CD3        | C2 calcium-dependent domain containing 3                             | 2.5                | 3.3    | ns     |
|   |   |   | AP1S3        | adaptor-related protein complex 1 sigma 3 subunit                    | 2.5                | 3.2    | ns     |
|   |   |   | PDE5A        | phosphodiesterase 5A, cGMP-specific                                  | 3.2                | 2.6    | ns     |
|   |   |   | TMEM155      | transmembrane protein 155                                            | 2.9                | 3.2    | ns     |
|   |   |   | LOC105369592 | uncharacterized LOC105369592                                         | 3.2                | 3.0    | ns     |
|   |   |   | RALGAPA2     | Ral GTPase activating protein, alpha subunit 2 (catalytic)           | 3.1                | 3.2    | ns     |
|   |   |   | FREM2        | FRAS1 related extracellular matrix protein 2                         | 3.2                | 2.8    | ns     |
|   |   |   | BTG3         | BTG family, member 3                                                 | 2.6                | 3.2    | ns     |
|   |   |   | ELMO1        | engulfment and cell motility 1                                       | 2.7                | 3.2    | ns     |
|   |   |   | LOC105369683 | uncharacterized LOC105369683                                         | 2.5                | 3.2    | ns     |
|   |   |   | NOS3         | nitric oxide synthase 3 (endothelial cell)                           | 2.6                | 3.2    | ns     |
|   |   |   | SCN11A       | sodium channel, voltage gated, type XI alpha subunit                 | 3.1                | 3.1    | ns     |
|   |   |   | PP12613      | uncharacterized LOC100192379                                         | 3.1                | 3.0    | ns     |
|   |   |   | ST3GAL1      | ST3 beta-galactoside alpha-2,3-sialyltransferase 1                   | 2.4                | 3.1    | ns     |
|   |   |   | BMP2         | bone morphogenetic protein 2                                         | 3.1                | 2.1    | ns     |
|   |   |   | FURIN        | furin (paired basic amino acid cleaving enzyme)                      | 2.7                | 3.1    | ns     |
|   |   |   | LOC105374693 | spidroin-2-like                                                      | 3.1                | 3.0    | ns     |
|   |   |   | AZIN1        | antizyme inhibitor 1                                                 | 2.1                | 3.1    | ns     |
|   |   |   | STARD4-AS1   | STARD4 antisense RNA 1                                               | 2.6                | 3.1    | ns     |
|   |   |   | GCLM         | glutamate-cysteine ligase, modifier subunit                          | 3.1                | 2.6    | ns     |
|   |   |   | SLC16A12-AS1 | SLC16A12 antisense RNA 1                                             | 3.1                | 3.0    | ns     |
|   |   |   | HOXA13       | homeobox A13                                                         | 2.1                | 3.1    | ns     |
|   |   |   | PHACTR2      | phosphatase and actin regulator 2                                    | 2.5                | 3.0    | ns     |
|   |   |   | WWC1         | WW and C2 domain containing 1                                        | 2.8                | 3.0    | ns     |
|   |   |   | NCBP3        | nuclear cap binding subunit 3                                        | 2.8                | 3.0    | ns     |
|   |   |   | CTB-99A3.1   | uncharacterized LOC105378215                                         | 2.6                | 3.0    | ns     |
|   |   |   | CHSY1        | chondroitin sulfate synthase 1                                       | 3.0                | 2.3    | ns     |
|   |   |   | LOC102723465 | uncharacterized LOC102723465                                         | 2.2                | 3.0    | ns     |
|   |   |   | LOC105369748 | uncharacterized LOC105369748                                         | 2.1                | 2.9    | ns     |
|   |   |   | TMTC2        | transmembrane and tetratricopeptide repeat containing 2              | 2.9                | 2.1    | ns     |
|   |   |   | GOLT1A       | golgi transport 1A                                                   | 2.6                | 2.9    | ns     |
|   |   |   | SLC4A4       | solute carrier family 4 (sodium bicarbonate cotransporter), member 4 | 2.9                | 2.7    | ns     |
|   |   |   | LINC00882    | long intergenic non-protein coding RNA 882                           | 2.9                | 2.8    | ns     |
|   |   |   | SLC25A35     | solute carrier family 25, member 35                                  | 2.7                | 2.9    | ns     |
|   |   |   | SCAPER       | S-phase cyclin A-associated protein in the ER                        | 2.0                | 2.9    | ns     |
|   |   |   | TSHZ1        | teashirt zinc finger homeobox 1                                      | 2.9                | 2.0    | ns     |
|   |   |   | MIR4501      | microRNA 4501                                                        | 2.8                | 2.1    | ns     |
|   |   |   | LYPD8        | LY6                                                                  | 2.8                | 2.3    | ns     |
|   |   |   | KDM7A-DT     | KDM7A divergent transcript                                           | 2.4                | 2.8    | ns     |

| S | C | E | Symbol       | Name                                                                 | Linear Fold Change |        |        |
|---|---|---|--------------|----------------------------------------------------------------------|--------------------|--------|--------|
|   |   |   |              |                                                                      | S vs C             | S vs E | E vs C |
|   |   |   | CRNDE        | colorectal neoplasia differentially expressed (non-protein coding)   | 2.8                | 2.8    | ns     |
|   |   |   | CADM1        | cell adhesion molecule 1                                             | 2.8                | 2.6    | ns     |
|   |   |   | ATP2B1       | ATPase, Ca <sup>++</sup> transporting, plasma membrane 1             | 2.8                | 2.4    | ns     |
|   |   |   | CALHM4       | calcium homeostasis modulator family member 4                        | 2.6                | 2.8    | ns     |
|   |   |   | MYLK         | myosin light chain kinase                                            | 2.8                | 2.2    | ns     |
|   |   |   | GPR171       | G protein-coupled receptor 171                                       | 2.8                | 2.7    | ns     |
|   |   |   | SLC18B1      | solute carrier family 18, subfamily B, member 1                      | 2.8                | 2.5    | ns     |
|   |   |   | MIR199A2     | microRNA 199a-2                                                      | 2.6                | 2.7    | ns     |
|   |   |   | ETFDH        | electron-transferring-flavoprotein dehydrogenase                     | 2.5                | 2.7    | ns     |
|   |   |   | FAM234B      | family with sequence similarity 234, member B                        | 2.4                | 2.7    | ns     |
|   |   |   | PRTG         | protogenin                                                           | 2.7                | 2.7    | ns     |
|   |   |   | ABCC2        | ATP binding cassette subfamily C member 2                            | 2.7                | 2.5    | ns     |
|   |   |   | STAT5B       | signal transducer and activator of transcription 5B                  | 2.0                | 2.7    | ns     |
|   |   |   | PRKCE        | protein kinase C, epsilon                                            | 2.7                | 2.4    | ns     |
|   |   |   | C16orf74     | chromosome 16 open reading frame 74                                  | 2.2                | 2.7    | ns     |
|   |   |   | CAST         | calpastatin                                                          | 2.1                | 2.6    | ns     |
|   |   |   | ETV5         | ets variant 5                                                        | 2.2                | 2.6    | ns     |
|   |   |   | NRP2         | neuropilin 2                                                         | 2.6                | 2.4    | ns     |
|   |   |   | LOC105370632 | uncharacterized LOC105370632                                         | 2.1                | 2.6    | ns     |
|   |   |   | PARP1        | poly(ADP-ribose) polymerase 1                                        | 2.4                | 2.6    | ns     |
|   |   |   | RYR2         | ryanodine receptor 2 (cardiac)                                       | 2.6                | 2.3    | ns     |
|   |   |   | WFDC1        | WAP four-disulfide core domain 1                                     | 2.6                | 2.2    | ns     |
|   |   |   | MRPS31P5     | mitochondrial ribosomal protein S31 pseudogene 5                     | 2.1                | 2.6    | ns     |
|   |   |   | MAGEA10      | MAGE family member A10                                               | 2.3                | 2.6    | ns     |
|   |   |   | AK3          | adenylate kinase 3                                                   | 2.5                | 2.4    | ns     |
|   |   |   | CTDSPL       | CTD small phosphatase like                                           | 2.3                | 2.5    | ns     |
|   |   |   | CASP4        | caspase 4                                                            | 2.2                | 2.5    | ns     |
|   |   |   | PNPO         | pyridoxamine 5-phosphate oxidase                                     | 2.5                | 2.5    | ns     |
|   |   |   | BHLHE41      | basic helix-loop-helix family, member e41                            | 2.5                | 2.0    | ns     |
|   |   |   | JCAD         | junctional cadherin 5 associated                                     | 2.5                | 2.2    | ns     |
|   |   |   | PGAP6        | post-glycosylphosphatidylinositol attachment to proteins 6           | 2.3                | 2.5    | ns     |
|   |   |   | CATSPER2     | cation channel, sperm associated 2                                   | 2.2                | 2.5    | ns     |
|   |   |   | NREP         | neuronal regeneration related protein                                | 2.4                | 2.5    | ns     |
|   |   |   | DOCK8        | dedicator of cytokinesis 8                                           | 2.5                | 2.4    | ns     |
|   |   |   | DGKD         | diacylglycerol kinase, delta 130kDa                                  | 2.1                | 2.5    | ns     |
|   |   |   | EID2         | EP300 interacting inhibitor of differentiation 2                     | 2.3                | 2.4    | ns     |
|   |   |   | RARB         | retinoic acid receptor, beta                                         | 2.3                | 2.4    | ns     |
|   |   |   | BMP1         | bone morphogenetic protein 1                                         | 2.4                | 2.3    | ns     |
|   |   |   | NPAS2        | neuronal PAS domain protein 2                                        | 2.3                | 2.4    | ns     |
|   |   |   | ZSCAN12P1    | zinc finger and SCAN domain containing 12 pseudogene 1               | 2.4                | 2.4    | ns     |
|   |   |   | CDYL2        | chromodomain protein, Y-like 2                                       | 2.4                | 2.4    | ns     |
|   |   |   | SPRY4        | sprouty RTK signaling antagonist 4                                   | 2.4                | 2.1    | ns     |
|   |   |   | COQ9         | coenzyme Q9                                                          | 2.4                | 2.1    | ns     |
|   |   |   | MAGI3        | membrane associated guanylate kinase, WW and PDZ domain containing 3 | 2.4                | 2.2    | ns     |
|   |   |   | ELK1         | ELK1, member of ETS oncogene family                                  | 2.3                | 2.3    | ns     |
|   |   |   | LOC105375423 | uncharacterized LOC105375423                                         | 2.3                | 2.3    | ns     |
|   |   |   | LOC101928092 | uncharacterized LOC101928092                                         | 2.3                | 2.3    | ns     |
|   |   |   | MMP16        | matrix metalloproteinase 16 (membrane-inserted)                      | 2.2                | 2.3    | ns     |
|   |   |   | LOC105379091 | uncharacterized LOC105379091                                         | 2.2                | 2.3    | ns     |
|   |   |   | VSIR         | V-set immunoregulatory receptor                                      | 2.2                | 2.3    | ns     |
|   |   |   | KIAA0319     | KIAA0319                                                             | 2.2                | 2.2    | ns     |
|   |   |   | ORMDL1       | ORMDL sphingolipid biosynthesis regulator 1                          | 2.1                | 2.2    | ns     |
|   |   |   | PDE4D        | phosphodiesterase 4D, cAMP-specific                                  | 2.1                | 2.2    | ns     |
|   |   |   | CDK6         | cyclin-dependent kinase 6                                            | 2.2                | 2.1    | ns     |
|   |   |   | NETO2        | neuropilin (NRP) and tolloid (TLL)-like 2                            | 2.2                | 2.1    | ns     |



| S | C | E | Symbol       | Name                                                                   | Linear Fold Change |        |        |
|---|---|---|--------------|------------------------------------------------------------------------|--------------------|--------|--------|
|   |   |   |              |                                                                        | S vs C             | S vs E | E vs C |
|   |   |   | NAV2-AS4     | NAV2 antisense RNA 4                                                   | 2.2                | 2.1    | ns     |
|   |   |   | ASB2         | ankyrin repeat and SOCS box containing 2                               | 2.1                | 2.1    | ns     |
|   |   |   | FNDC3A       | fibronectin type III domain containing 3A                              | 2.1                | 2.1    | ns     |
|   |   |   | LDHB         | lactate dehydrogenase B                                                | 2.1                | 2.0    | ns     |
|   |   |   | OXGR1        | oxoglutarate (alpha-ketoglutarate) receptor 1                          | -15.0              | ns     | -7.4   |
|   |   |   | FABP7        | fatty acid binding protein 7, brain                                    | -12.6              | ns     | -9.7   |
|   |   |   | LOC102723596 | uncharacterized LOC102723596                                           | -9.3               | ns     | -11.5  |
|   |   |   | LOC105377976 | uncharacterized LOC105377976                                           | -10.3              | ns     | -8.0   |
|   |   |   | TNNI2        | troponin I type 2 (skeletal, fast)                                     | -10.1              | ns     | -4.6   |
|   |   |   | ITGB6        | integrin beta 6                                                        | -8.3               | ns     | -7.0   |
|   |   |   | COL17A1      | collagen, type XVII, alpha 1                                           | -8.2               | ns     | -3.7   |
|   |   |   | SERPINB7     | serpin peptidase inhibitor, clade B (ovalbumin), member 7              | -7.1               | ns     | -7.3   |
|   |   |   | RAB9BP1      | RAB9B, member RAS oncogene family pseudogene 1                         | -4.4               | ns     | -6.9   |
|   |   |   | NLRP2        | NLR family, pyrin domain containing 2                                  | -6.8               | ns     | -5.3   |
|   |   |   | ACAN         | aggrecan                                                               | -4.6               | ns     | -6.2   |
|   |   |   | SERTAD4      | SERTA domain containing 4                                              | -5.9               | ns     | -3.0   |
|   |   |   | FAM83B       | family with sequence similarity 83, member B                           | -3.4               | ns     | -5.7   |
|   |   |   | LOC102723854 | uncharacterized LOC102723854                                           | -5.2               | ns     | -3.4   |
|   |   |   | VIT          | vitrin                                                                 | -4.7               | ns     | -5.1   |
|   |   |   | KRT7         | keratin 7, type II                                                     | -5.0               | ns     | -3.7   |
|   |   |   | LOC105377408 | uncharacterized LOC105377408                                           | -4.8               | ns     | -2.7   |
|   |   |   | TET1         | tet methylcytosine dioxygenase 1                                       | -2.9               | ns     | -4.7   |
|   |   |   | KRT14        | keratin 14, type I                                                     | -4.7               | ns     | -3.5   |
|   |   |   | SRI          | sorcin                                                                 | -4.6               | ns     | -2.3   |
|   |   |   | IGSF10       | immunoglobulin superfamily, member 10                                  | -4.2               | ns     | -4.1   |
|   |   |   | CMTM4        | CKLF-like MARVEL transmembrane domain containing 4                     | -4.2               | ns     | -2.3   |
|   |   |   | SEMA4C       | semaphorin 4C                                                          | -4.0               | ns     | -2.3   |
|   |   |   | GDPD2        | glycerophosphodiester phosphodiesterase domain containing 2            | -4.0               | ns     | -3.8   |
|   |   |   | EFNA1        | ephrin-A1                                                              | -3.8               | ns     | -2.1   |
|   |   |   | LINC00456    | long intergenic non-protein coding RNA 456                             | -2.9               | ns     | -3.7   |
|   |   |   | CCDC81       | coiled-coil domain containing 81                                       | -3.6               | ns     | -2.7   |
|   |   |   | PKP2         | plakophilin 2                                                          | -3.6               | ns     | -2.1   |
|   |   |   | BMS1P18      | BMS1 ribosome biogenesis factor pseudogene 18                          | -3.6               | ns     | -2.4   |
|   |   |   | VLDLR        | very low density lipoprotein receptor                                  | -3.5               | ns     | -2.9   |
|   |   |   | PTBP3        | polypyrimidine tract binding protein 3                                 | -3.2               | ns     | -2.0   |
|   |   |   | GATA3        | GATA binding protein 3                                                 | -3.2               | ns     | -2.0   |
|   |   |   | APOBR        | apolipoprotein B receptor                                              | -3.1               | ns     | -2.2   |
|   |   |   | PPARG        | peroxisome proliferator-activated receptor gamma                       | -3.1               | ns     | -2.9   |
|   |   |   | INHA         | inhibin alpha                                                          | -3.0               | ns     | -2.4   |
|   |   |   | DLX3         | distal-less homeobox 3                                                 | -2.8               | ns     | -3.0   |
|   |   |   | CTSV         | cathepsin V                                                            | -2.6               | ns     | -3.0   |
|   |   |   | NOCT         | nocturnin                                                              | -2.6               | ns     | -2.9   |
|   |   |   | LOC101927431 | uncharacterized LOC101927431                                           | -2.8               | ns     | -2.9   |
|   |   |   | GPR37        | G protein-coupled receptor 37 (endothelin receptor type B-like)        | -2.7               | ns     | -2.8   |
|   |   |   | ZNF257       | zinc finger protein 257                                                | -2.7               | ns     | -2.8   |
|   |   |   | TRABD2A      | TraB domain containing 2A                                              | -2.8               | ns     | -2.3   |
|   |   |   | LOC105379110 | uncharacterized LOC105379110                                           | -2.3               | ns     | -2.7   |
|   |   |   | SYDE1        | synapse defective 1, Rho GTPase, homolog 1 (C. elegans)                | -2.7               | ns     | -2.3   |
|   |   |   | RFK          | riboflavin kinase                                                      | -2.6               | ns     | -2.3   |
|   |   |   | RTN2         | reticulon 2                                                            | -2.3               | ns     | -2.1   |
|   |   |   | PIK3CB       | phosphatidylinositol-4,5-bisphosphate 3-kinase, catalytic subunit beta | -2.0               | ns     | -2.3   |
|   |   |   | SLPI         | secretory leukocyte peptidase inhibitor                                | ns                 | -157.1 | 24.7   |
|   |   |   | GZMA         | granzyme A                                                             | ns                 | -92.6  | 15.0   |
|   |   |   | CFH          | complement factor H                                                    | ns                 | -83.1  | 16.5   |
|   |   |   | TRDC         | T cell receptor delta constant                                         | ns                 | -76.6  | 17.0   |

| S | C | E | Symbol       | Name                                                               | Linear Fold Change |        |        |
|---|---|---|--------------|--------------------------------------------------------------------|--------------------|--------|--------|
|   |   |   |              |                                                                    | S vs C             | S vs E | E vs C |
|   |   |   | TRDJ2        | T cell receptor delta joining 2                                    | ns                 | -75.4  | 19.3   |
|   |   |   | OMD          | osteomodulin                                                       | ns                 | -64.4  | 14.7   |
|   |   |   | RXFP1        | relaxin                                                            | ns                 | -57.4  | 17.9   |
|   |   |   | C3           | complement component 3                                             | ns                 | -44.8  | 15.5   |
|   |   |   | FGG          | fibrinogen gamma chain                                             | ns                 | -35.1  | 18.2   |
|   |   |   | KLRC1        | killer cell lectin-like receptor subfamily C, member 1             | ns                 | -34.8  | 14.2   |
|   |   |   | MEDAG        | mesenteric estrogen-dependent adipogenesis                         | ns                 | -34.7  | 12.1   |
|   |   |   | KLRC3        | killer cell lectin-like receptor subfamily C, member 3             | ns                 | -33.6  | 16.2   |
|   |   |   | CXCL10       | chemokine (C-X-C motif) ligand 10                                  | ns                 | -29.6  | 11.6   |
|   |   |   | CNR1         | cannabinoid receptor 1 (brain)                                     | ns                 | -28.0  | 13.4   |
|   |   |   | DKK1         | dickkopf WNT signaling pathway inhibitor 1                         | ns                 | -27.5  | 9.5    |
|   |   |   | ANKRD1       | ankyrin repeat domain 1 (cardiac muscle)                           | ns                 | -26.4  | 8.9    |
|   |   |   | CP           | ceruloplasmin (ferroxidase)                                        | ns                 | -24.8  | 15.9   |
|   |   |   | TRPC4        | transient receptor potential cation channel, subfamily C, member 4 | ns                 | -24.1  | 23.2   |
|   |   |   | P115         | peptidase inhibitor 15                                             | ns                 | -23.3  | 18.2   |
|   |   |   | CYP7B1       | cytochrome P450, family 7, subfamily B, polypeptide 1              | ns                 | -22.9  | 9.8    |
|   |   |   | NKG7         | natural killer cell granule protein 7                              | ns                 | -22.7  | 11.1   |
|   |   |   | NDP          | Norrie disease (pseudoglioma)                                      | ns                 | -21.0  | 9.2    |
|   |   |   | APOD         | apolipoprotein D                                                   | ns                 | -20.3  | 8.9    |
|   |   |   | CPXM1        | carboxypeptidase X (M14 family), member 1                          | ns                 | -19.4  | 13.0   |
|   |   |   | CCL4         | chemokine (C-C motif) ligand 4                                     | ns                 | -19.2  | 16.3   |
|   |   |   | PROK1        | prokineticin 1                                                     | ns                 | -19.1  | 9.9    |
|   |   |   | HSPB6        | heat shock protein, alpha-crystallin-related, B6                   | ns                 | -18.6  | 8.1    |
|   |   |   | TRDJ1        | T cell receptor delta joining 1                                    | ns                 | -17.8  | 11.1   |
|   |   |   | ALDH1A1      | aldehyde dehydrogenase 1 family, member A1                         | ns                 | -17.7  | 12.9   |
|   |   |   | PRUNE2       | prune homolog 2 (Drosophila)                                       | ns                 | -16.6  | 9.0    |
|   |   |   | TRBV3-1      | T cell receptor beta variable 3-1                                  | ns                 | -16.0  | 10.4   |
|   |   |   | RGS1         | regulator of G-protein signaling 1                                 | ns                 | -15.9  | 7.6    |
|   |   |   | CTSK         | cathepsin K                                                        | ns                 | -15.2  | 9.6    |
|   |   |   | RBP4         | retinol binding protein 4, plasma                                  | ns                 | -14.8  | 8.9    |
|   |   |   | GZMK         | granzyme K                                                         | ns                 | -14.7  | 9.3    |
|   |   |   | MAOB         | monoamine oxidase B                                                | ns                 | -14.5  | 6.7    |
|   |   |   | ABCA8        | ATP binding cassette subfamily A member 8                          | ns                 | -11.2  | 14.4   |
|   |   |   | LOC100507639 | uncharacterized LOC100507639                                       | ns                 | -14.4  | 8.9    |
|   |   |   | PALMD        | palmdelphin                                                        | ns                 | -5.0   | 14.1   |
|   |   |   | MACC1-AS1    | MACC1 antisense RNA 1                                              | ns                 | -13.9  | 6.8    |
|   |   |   | MAP3K5       | mitogen-activated protein kinase kinase kinase 5                   | ns                 | -13.9  | 7.6    |
|   |   |   | FPR3         | formyl peptide receptor 3                                          | ns                 | -13.9  | 10.1   |
|   |   |   | KLRC4-KLRK1  | KLRC4-KLRK1 readthrough                                            | ns                 | -13.9  | 11.4   |
|   |   |   | IFI44        | interferon-induced protein 44                                      | ns                 | -13.5  | 12.3   |
|   |   |   | TRGJP1       | T cell receptor gamma joining P1                                   | ns                 | -13.4  | 12.6   |
|   |   |   | PGR          | progesterone receptor                                              | ns                 | -13.3  | 9.8    |
|   |   |   | SULF2        | sulfatase 2                                                        | ns                 | -13.1  | 10.5   |
|   |   |   | PARM1        | prostate androgen-regulated mucin-like protein 1                   | ns                 | -13.0  | 12.1   |
|   |   |   | TRGJP2       | T cell receptor gamma joining P2                                   | ns                 | -13.0  | 11.4   |
|   |   |   | CST11        | cystatin 11                                                        | ns                 | -12.9  | 9.3    |
|   |   |   | ABI3BP       | ABI family, member 3 (NESH) binding protein                        | ns                 | -12.8  | 8.4    |
|   |   |   | AOX1         | aldehyde oxidase 1                                                 | ns                 | -12.7  | 11.5   |
|   |   |   | XCL2         | chemokine (C motif) ligand 2                                       | ns                 | -12.6  | 6.5    |
|   |   |   | SPARCL1      | SPARC like 1                                                       | ns                 | -3.9   | 12.5   |
|   |   |   | HSD11B1      | hydroxysteroid (11-beta) dehydrogenase 1                           | ns                 | -11.8  | 12.4   |
|   |   |   | IL15         | interleukin 15                                                     | ns                 | -12.4  | 11.8   |
|   |   |   | FGA          | fibrinogen alpha chain                                             | ns                 | -11.2  | 12.2   |
|   |   |   | COX7A1       | cytochrome c oxidase subunit VIIa polypeptide 1 (muscle)           | ns                 | -7.1   | 12.1   |
|   |   |   | CD96         | CD96 molecule                                                      | ns                 | -12.1  | 9.0    |

| S | C | E | Symbol       | Name                                                                                | Linear Fold Change |        |        |
|---|---|---|--------------|-------------------------------------------------------------------------------------|--------------------|--------|--------|
|   |   |   |              |                                                                                     | S vs C             | S vs E | E vs C |
|   |   |   | SQOR         | sulfide quinone oxidoreductase                                                      | ns                 | -12.1  | 9.5    |
|   |   |   | PLPP1        | phospholipid phosphatase 1                                                          | ns                 | -11.7  | 7.4    |
|   |   |   | GALNT15      | polypeptide N-acetylgalactosaminyltransferase 15                                    | ns                 | -11.6  | 8.7    |
|   |   |   | CLIC2        | chloride intracellular channel 2                                                    | ns                 | -11.6  | 10.9   |
|   |   |   | FHL5         | four and a half LIM domains 5                                                       | ns                 | -11.4  | 8.7    |
|   |   |   | GZMB         | granzyme B                                                                          | ns                 | -11.4  | 7.5    |
|   |   |   | STAP1        | signal transducing adaptor family member 1                                          | ns                 | -10.9  | 11.2   |
|   |   |   | AVPR1A       | arginine vasopressin receptor 1A                                                    | ns                 | -11.1  | 7.5    |
|   |   |   | WT1          | Wilms tumor 1                                                                       | ns                 | -11.0  | 5.6    |
|   |   |   | LOC105372762 | uncharacterized LOC105372762                                                        | ns                 | -8.5   | 10.9   |
|   |   |   | PTPN22       | protein tyrosine phosphatase, non-receptor type 22 (lymphoid)                       | ns                 | -10.8  | 8.8    |
|   |   |   | CHI3L2       | chitinase 3-like 2                                                                  | ns                 | -10.6  | 4.4    |
|   |   |   | IL2RG        | interleukin 2 receptor, gamma                                                       | ns                 | -10.6  | 7.9    |
|   |   |   | GPR174       | G protein-coupled receptor 174                                                      | ns                 | -10.6  | 8.6    |
|   |   |   | PDGFD        | platelet derived growth factor D                                                    | ns                 | -10.5  | 8.3    |
|   |   |   | MXRA7        | matrix-remodelling associated 7                                                     | ns                 | -10.5  | 4.1    |
|   |   |   | HLA-DPA1     | major histocompatibility complex, class II, DP alpha 1                              | ns                 | -10.4  | 5.6    |
|   |   |   | SULF1        | sulfatase 1                                                                         | ns                 | -10.3  | 8.5    |
|   |   |   | PRF1         | perforin 1 (pore forming protein)                                                   | ns                 | -10.1  | 6.2    |
|   |   |   | ZNF727       | zinc finger protein 727                                                             | ns                 | -10.1  | 6.9    |
|   |   |   | FGF2         | fibroblast growth factor 2 (basic)                                                  | ns                 | -5.9   | 10.0   |
|   |   |   | PILRA        | paired immunoglobulin-like type 2 receptor alpha                                    | ns                 | -10.0  | 6.7    |
|   |   |   | CD74         | CD74 molecule, major histocompatibility complex, class II invariant chain           | ns                 | -10.0  | 5.0    |
|   |   |   | ME1          | malic enzyme 1, NADP(+)-dependent, cytosolic                                        | ns                 | -10.0  | 6.6    |
|   |   |   | GZMH         | granzyme H                                                                          | ns                 | -9.7   | 6.9    |
|   |   |   | IGFBP2       | insulin like growth factor binding protein 2                                        | ns                 | -9.7   | 6.6    |
|   |   |   | PLN          | phospholamban                                                                       | ns                 | -3.7   | 9.7    |
|   |   |   | TM6SF1       | transmembrane 6 superfamily member 1                                                | ns                 | -5.4   | 9.6    |
|   |   |   | CABCOCO1     | ciliary associated calcium binding coiled-coil 1                                    | ns                 | -9.5   | 6.5    |
|   |   |   | TMTC1        | transmembrane and tetratricopeptide repeat containing 1                             | ns                 | -9.5   | 9.2    |
|   |   |   | PTPRC        | protein tyrosine phosphatase, receptor type, C                                      | ns                 | -9.3   | 9.4    |
|   |   |   | SEMA3A       | semaphorin 3A                                                                       | ns                 | -6.4   | 9.3    |
|   |   |   | SCARA5       | scavenger receptor class A, member 5                                                | ns                 | -9.3   | 7.0    |
|   |   |   | SPOCK1       | sparc                                                                               | ns                 | -9.3   | 5.1    |
|   |   |   | CLEC2B       | C-type lectin domain family 2, member B                                             | ns                 | -5.7   | 9.3    |
|   |   |   | TRAV20       | T cell receptor alpha variable 20                                                   | ns                 | -9.3   | 7.4    |
|   |   |   | CFI          | complement factor I                                                                 | ns                 | -6.8   | 9.2    |
|   |   |   | SYNPO2       | synaptopodin 2                                                                      | ns                 | -8.5   | 9.2    |
|   |   |   | PLEKHH2      | pleckstrin homology domain containing, family H (with MyTH4 domain) member 2        | ns                 | -5.9   | 9.1    |
|   |   |   | ABCA6        | ATP binding cassette subfamily A member 6                                           | ns                 | -7.7   | 9.1    |
|   |   |   | PTH1H        | parathyroid hormone-like hormone                                                    | ns                 | -9.1   | 5.6    |
|   |   |   | CTSW         | cathepsin W                                                                         | ns                 | -9.0   | 7.7    |
|   |   |   | SLC1A1       | solute carrier family 1 (neuronal                                                   | ns                 | -7.0   | 9.0    |
|   |   |   | FGB          | fibrinogen beta chain                                                               | ns                 | -9.0   | 8.7    |
|   |   |   | P2RY14       | purinergic receptor P2Y, G-protein coupled, 14                                      | ns                 | -4.1   | 8.9    |
|   |   |   | PTPN13       | protein tyrosine phosphatase, non-receptor type 13 (APO-1                           | ns                 | -6.6   | 8.9    |
|   |   |   | IGFBP4       | insulin like growth factor binding protein 4                                        | ns                 | -8.8   | 7.3    |
|   |   |   | IGFBP6       | insulin like growth factor binding protein 6                                        | ns                 | -8.8   | 4.4    |
|   |   |   | GPR82        | G protein-coupled receptor 82                                                       | ns                 | -8.7   | 8.2    |
|   |   |   | RNASE2       | ribonuclease, RNase A family, 2 (liver, eosinophil-derived neurotoxin)              | ns                 | -8.6   | 6.9    |
|   |   |   | PDZK1IP1     | PDZK1 interacting protein 1                                                         | ns                 | -8.6   | 4.5    |
|   |   |   | SERPINA3     | serpin peptidase inhibitor, clade A (alpha-1 antiproteinase, antitrypsin), member 3 | ns                 | -8.4   | 4.2    |
|   |   |   | DEPTOR       | DEP domain containing MTOR-interacting protein                                      | ns                 | -8.4   | 5.1    |
|   |   |   | PTPRCAP      | protein tyrosine phosphatase, receptor type, C-associated protein                   | ns                 | -8.2   | 5.4    |
|   |   |   | NAV3         | neuron navigator 3                                                                  | ns                 | -5.3   | 8.2    |

| S | C | E | Symbol       | Name                                                                            | Linear Fold Change |        |        |
|---|---|---|--------------|---------------------------------------------------------------------------------|--------------------|--------|--------|
|   |   |   |              |                                                                                 | S vs C             | S vs E | E vs C |
|   |   |   | PLCL1        | phospholipase C-like 1                                                          | ns                 | -4.1   | 8.1    |
|   |   |   | IGFBP7       | insulin like growth factor binding protein 7                                    | ns                 | -7.2   | 8.1    |
|   |   |   | CD52         | CD52 molecule                                                                   | ns                 | -8.1   | 5.6    |
|   |   |   | ADAMTS5      | ADAM metalloproteinase with thrombospondin type 1 motif 5                       | ns                 | -7.9   | 8.0    |
|   |   |   | GAS1         | growth arrest-specific 1                                                        | ns                 | -8.0   | 5.8    |
|   |   |   | LRRK2        | leucine-rich repeat kinase 2                                                    | ns                 | -7.0   | 7.9    |
|   |   |   | CCL4L2       | chemokine (C-C motif) ligand 4-like 2                                           | ns                 | -7.9   | 6.5    |
|   |   |   | HAND2-AS1    | HAND2 antisense RNA 1 (head to head)                                            | ns                 | -7.8   | 7.6    |
|   |   |   | PRDM1        | PR domain containing 1, with ZNF domain                                         | ns                 | -7.8   | 6.2    |
|   |   |   | HAMP         | hepcidin antimicrobial peptide                                                  | ns                 | -7.7   | 4.1    |
|   |   |   | ENTPD3       | ectonucleoside triphosphate diphosphohydrolase 3                                | ns                 | -7.7   | 6.4    |
|   |   |   | REN          | renin                                                                           | ns                 | -7.7   | 6.8    |
|   |   |   | MYL9         | myosin light chain 9                                                            | ns                 | -7.5   | 6.6    |
|   |   |   | CCL21        | chemokine (C-C motif) ligand 21                                                 | ns                 | -7.5   | 7.2    |
|   |   |   | LOC105379342 | uncharacterized LOC105379342                                                    | ns                 | -7.4   | 5.0    |
|   |   |   | ITGB8        | integrin beta 8                                                                 | ns                 | -3.2   | 7.4    |
|   |   |   | HLA-DQA2     | major histocompatibility complex, class II, DQ alpha 2                          | ns                 | -7.3   | 4.2    |
|   |   |   | DOCK10       | dedicator of cytokinesis 10                                                     | ns                 | -7.3   | 6.7    |
|   |   |   | DTNA         | dystrobrevin, alpha                                                             | ns                 | -7.3   | 6.1    |
|   |   |   | CD226        | CD226 molecule                                                                  | ns                 | -6.7   | 7.2    |
|   |   |   | ADRA2C       | adrenoceptor alpha 2C                                                           | ns                 | -7.1   | 4.5    |
|   |   |   | TLR4         | toll-like receptor 4                                                            | ns                 | -4.9   | 7.1    |
|   |   |   | TRDJ3        | T cell receptor delta joining 3                                                 | ns                 | -7.1   | 6.6    |
|   |   |   | PRR15        | proline rich 15                                                                 | ns                 | -7.0   | 3.0    |
|   |   |   | ASPN         | asporin                                                                         | ns                 | -7.0   | 5.9    |
|   |   |   | NPR3         | natriuretic peptide receptor 3                                                  | ns                 | -6.9   | 7.0    |
|   |   |   | CXCL13       | chemokine (C-X-C motif) ligand 13                                               | ns                 | -7.0   | 4.9    |
|   |   |   | ZEB1         | zinc finger E-box binding homeobox 1                                            | ns                 | -3.9   | 7.0    |
|   |   |   | TXNIP        | thioredoxin interacting protein                                                 | ns                 | -2.6   | 7.0    |
|   |   |   | TRGV10       | T cell receptor gamma variable 10 (non-functional)                              | ns                 | -6.9   | 6.8    |
|   |   |   | RGS2         | regulator of G-protein signaling 2                                              | ns                 | -3.4   | 6.9    |
|   |   |   | TMEM47       | transmembrane protein 47                                                        | ns                 | -6.9   | 6.8    |
|   |   |   | EMILIN2      | elastin microfibril interfacier 2                                               | ns                 | -4.7   | 6.9    |
|   |   |   | CD2          | CD2 molecule                                                                    | ns                 | -6.3   | 6.8    |
|   |   |   | RGS22        | regulator of G-protein signaling 22                                             | ns                 | -6.8   | 5.1    |
|   |   |   | DPYD         | dihydropyrimidine dehydrogenase                                                 | ns                 | -5.0   | 6.8    |
|   |   |   | OSGIN2       | oxidative stress induced growth inhibitor family member 2                       | ns                 | -6.7   | 3.1    |
|   |   |   | SAMD9L       | sterile alpha motif domain containing 9-like                                    | ns                 | -6.7   | 4.9    |
|   |   |   | KIR2DL3      | killer cell immunoglobulin-like receptor, two domains, long cytoplasmic tail, 3 | ns                 | -6.6   | 5.6    |
|   |   |   | RNASE6       | ribonuclease, RNase A family, k6                                                | ns                 | -4.7   | 6.6    |
|   |   |   | CXCL16       | chemokine (C-X-C motif) ligand 16                                               | ns                 | -6.6   | 3.8    |
|   |   |   | CD248        | CD248 molecule, endosialin                                                      | ns                 | -4.3   | 6.6    |
|   |   |   | PDGFRA       | platelet-derived growth factor receptor, alpha polypeptide                      | ns                 | -2.9   | 6.6    |
|   |   |   | KCND2        | potassium channel, voltage gated Shal related subfamily D, member 2             | ns                 | -6.5   | 5.6    |
|   |   |   | ANG          | angiogenin, ribonuclease, RNase A family, 5                                     | ns                 | -6.5   | 3.1    |
|   |   |   | METRNL       | meteorin, glial cell differentiation regulator                                  | ns                 | -6.5   | 2.9    |
|   |   |   | GLB1L2       | galactosidase beta 1 like 2                                                     | ns                 | -6.5   | 4.1    |
|   |   |   | GPR155       | G protein-coupled receptor 155                                                  | ns                 | -6.5   | 3.5    |
|   |   |   | OGN          | osteoglycin                                                                     | ns                 | -5.3   | 6.4    |
|   |   |   | KLRB1        | killer cell lectin-like receptor subfamily B, member 1                          | ns                 | -6.4   | 5.0    |
|   |   |   | EMP3         | epithelial membrane protein 3                                                   | ns                 | -6.3   | 4.3    |
|   |   |   | LOC102724994 | putative POM121-like protein 1-like                                             | ns                 | -6.3   | 5.5    |
|   |   |   | LOC441081    | POM121 membrane glycoprotein (rat) pseudogene                                   | ns                 | -6.3   | 5.5    |
|   |   |   | LOC728093    | putative POM121-like protein 1-like                                             | ns                 | -6.3   | 5.5    |
|   |   |   | CTSS         | cathepsin S                                                                     | ns                 | -5.1   | 6.3    |

| S | C | E | Symbol       | Name                                                                | Linear Fold Change |        |        |
|---|---|---|--------------|---------------------------------------------------------------------|--------------------|--------|--------|
|   |   |   |              |                                                                     | S vs C             | S vs E | E vs C |
|   |   |   | LAPTM5       | lysosomal protein transmembrane 5                                   | ns                 | -4.9   | 6.3    |
|   |   |   | MS4A6A       | membrane-spanning 4-domains, subfamily A, member 6A                 | ns                 | -4.7   | 6.2    |
|   |   |   | TUBA3E       | tubulin, alpha 3e                                                   | ns                 | -6.2   | 3.9    |
|   |   |   | SCPEP1       | serine carboxypeptidase 1                                           | ns                 | -5.8   | 6.1    |
|   |   |   | FGL2         | fibrinogen-like 2                                                   | ns                 | -4.2   | 6.1    |
|   |   |   | CCL2         | chemokine (C-C motif) ligand 2                                      | ns                 | -3.5   | 6.1    |
|   |   |   | CERS6-AS1    | CERS6 antisense RNA 1                                               | ns                 | -6.1   | 4.1    |
|   |   |   | GREB1        | growth regulation by estrogen in breast cancer 1                    | ns                 | -6.1   | 5.3    |
|   |   |   | APOBEC3C     | apolipoprotein B mRNA editing enzyme, catalytic polypeptide-like 3C | ns                 | -4.5   | 6.0    |
|   |   |   | KLF9         | Kruppel-like factor 9                                               | ns                 | -6.0   | 4.9    |
|   |   |   | EVA1C        | eva-1 homolog C (C. elegans)                                        | ns                 | -5.9   | 5.2    |
|   |   |   | STAMBPL1     | STAM binding protein-like 1                                         | ns                 | -4.1   | 5.9    |
|   |   |   | MCTP1        | multiple C2 domains, transmembrane 1                                | ns                 | -3.7   | 5.9    |
|   |   |   | MS4A7        | membrane-spanning 4-domains, subfamily A, member 7                  | ns                 | -3.5   | 5.9    |
|   |   |   | ISLR         | immunoglobulin superfamily containing leucine-rich repeat           | ns                 | -5.8   | 4.1    |
|   |   |   | THBS1        | thrombospondin 1                                                    | ns                 | -3.6   | 5.8    |
|   |   |   | RBP1         | retinol binding protein 1, cellular                                 | ns                 | -5.8   | 2.9    |
|   |   |   | MECOM        | MDS1 and EVI1 complex locus                                         | ns                 | -2.6   | 5.7    |
|   |   |   | MGP          | matrix Gla protein                                                  | ns                 | -5.7   | 5.4    |
|   |   |   | DHRS3        | dehydrogenase                                                       | ns                 | -5.7   | 2.4    |
|   |   |   | KERA         | keratocan                                                           | ns                 | -5.7   | 4.8    |
|   |   |   | HTR2B        | 5-hydroxytryptamine (serotonin) receptor 2B, G protein-coupled      | ns                 | -5.7   | 4.1    |
|   |   |   | TNFRSF11B    | tumor necrosis factor receptor superfamily, member 11b              | ns                 | -5.7   | 5.2    |
|   |   |   | LOC105376125 | uncharacterized LOC105376125                                        | ns                 | -5.7   | 5.1    |
|   |   |   | CAB39L       | calcium binding protein 39-like                                     | ns                 | -5.7   | 4.8    |
|   |   |   | FCER1G       | Fc fragment of IgE, high affinity I, receptor for gamma polypeptide | ns                 | -3.5   | 5.6    |
|   |   |   | LYZ          | lysozyme                                                            | ns                 | -5.5   | 4.1    |
|   |   |   | CST7         | cystatin F (leukocystatin)                                          | ns                 | -5.5   | 3.0    |
|   |   |   | MGST1        | microsomal glutathione S-transferase 1                              | ns                 | -5.5   | 3.6    |
|   |   |   | MFGE8        | milk fat globule-EGF factor 8 protein                               | ns                 | -5.5   | 3.8    |
|   |   |   | HAND2        | heart and neural crest derivatives expressed 2                      | ns                 | -5.5   | 4.2    |
|   |   |   | S100A3       | S100 calcium binding protein A3                                     | ns                 | -5.5   | 4.6    |
|   |   |   | CD38         | CD38 molecule                                                       | ns                 | -5.5   | 3.6    |
|   |   |   | MACC1        | metastasis associated in colon cancer 1                             | ns                 | -5.5   | 3.7    |
|   |   |   | LMOD1        | leiomodulin 1 (smooth muscle)                                       | ns                 | -3.6   | 5.5    |
|   |   |   | CEP126       | centrosomal protein 126kDa                                          | ns                 | -5.4   | 3.3    |
|   |   |   | CD53         | CD53 molecule                                                       | ns                 | -3.6   | 5.4    |
|   |   |   | MAP1LC3C     | microtubule associated protein 1 light chain 3 gamma                | ns                 | -4.1   | 5.4    |
|   |   |   | BTBD3        | BTB (POZ) domain containing 3                                       | ns                 | -2.4   | 5.3    |
|   |   |   | TLR1         | toll-like receptor 1                                                | ns                 | -5.3   | 4.1    |
|   |   |   | CERS6        | ceramide synthase 6                                                 | ns                 | -5.3   | 4.4    |
|   |   |   | TYROBP       | TYRO protein tyrosine kinase binding protein                        | ns                 | -4.7   | 5.3    |
|   |   |   | AXL          | AXL receptor tyrosine kinase                                        | ns                 | -5.0   | 5.2    |
|   |   |   | CCDC170      | coiled-coil domain containing 170                                   | ns                 | -5.2   | 3.5    |
|   |   |   | LCP2         | lymphocyte cytosolic protein 2                                      | ns                 | -3.5   | 5.2    |
|   |   |   | LINC00707    | long intergenic non-protein coding RNA 707                          | ns                 | -5.2   | 4.8    |
|   |   |   | TSPAN1       | tetraspanin 1                                                       | ns                 | -4.9   | 5.2    |
|   |   |   | LOC389033    | placenta-specific 9 pseudogene                                      | ns                 | -5.1   | 3.5    |
|   |   |   | APOO         | apolipoprotein O                                                    | ns                 | -5.0   | 5.1    |
|   |   |   | OTULINL      | OTU deubiquitinase with linear linkage specificity like             | ns                 | -4.6   | 5.0    |
|   |   |   | APCS         | amyloid P component, serum                                          | ns                 | -4.5   | 5.0    |
|   |   |   | TLR7         | toll-like receptor 7                                                | ns                 | -3.9   | 4.9    |
|   |   |   | MYO5A        | myosin VA                                                           | ns                 | -2.8   | 4.9    |
|   |   |   | C1QC         | complement component 1, q subcomponent, C chain                     | ns                 | -4.7   | 4.8    |
|   |   |   | GTF2A1L      | general transcription factor IIA 1-like                             | ns                 | -3.9   | 4.8    |



| S | C | E | Symbol       | Name                                              | Linear Fold Change |        |        |
|---|---|---|--------------|---------------------------------------------------|--------------------|--------|--------|
|   |   |   |              |                                                   | S vs C             | S vs E | E vs C |
|   |   |   | PRPS2        | phosphoribosyl pyrophosphate synthetase 2         | ns                 | -4.7   | 4.8    |
|   |   |   | NCAM1        | neural cell adhesion molecule 1                   | ns                 | -4.8   | 3.5    |
|   |   |   | SH3BGRL      | SH3 domain binding glutamate-rich protein like    | ns                 | -2.5   | 4.8    |
|   |   |   | C1QA         | complement component 1, q subcomponent, A chain   | ns                 | -3.1   | 4.8    |
|   |   |   | MSN          | moesin                                            | ns                 | -2.5   | 4.8    |
|   |   |   | ODC1         | ornithine decarboxylase 1                         | ns                 | -3.1   | 4.8    |
|   |   |   | CD68         | CD68 molecule                                     | ns                 | -4.8   | 3.0    |
|   |   |   | LONRF2       | LON peptidase N-terminal domain and ring finger 2 | ns                 | -2.3   | 4.8    |
|   |   |   | SETDB2       | SET domain, bifurcated 2                          | ns                 | -4.8   | 3.3    |
|   |   |   | HOXA11       | homeobox A11                                      | ns                 | -4.5   | 4.7    |
|   |   |   | GBP5         | guanylate binding protein 5                       | ns                 | -4.6   | 4.7    |
|   |   |   | ICAM2        | intercellular adhesion molecule 2                 | ns                 | -2.2   | 4.7    |
|   |   |   | C1GALT1C1L   | C1GALT1-specific chaperone 1 like                 | ns                 | -4.7   | 3.8    |
|   |   |   | TMEM132C     | transmembrane protein 132C                        | ns                 | -4.7   | 2.9    |
|   |   |   | SYTL4        | synaptotagmin-like 4                              | ns                 | -3.0   | 4.6    |
|   |   |   | C1S          | complement component 1, s subcomponent            | ns                 | -4.5   | 4.6    |
|   |   |   | GPRIN3       | GPRIN family member 3                             | ns                 | -4.6   | 3.8    |
|   |   |   | EOMES        | eomesodermin                                      | ns                 | -4.0   | 4.6    |
|   |   |   | C5AR1        | complement component 5a receptor 1                | ns                 | -4.6   | 4.0    |
|   |   |   | C1QB         | complement component 1, q subcomponent, B chain   | ns                 | -4.6   | 4.1    |
|   |   |   | C1R          | complement component 1, r subcomponent            | ns                 | -4.6   | 3.6    |
|   |   |   | MTDH         | metadherin                                        | ns                 | -4.5   | 2.4    |
|   |   |   | NNMT         | nicotinamide N-methyltransferase                  | ns                 | -4.5   | 4.2    |
|   |   |   | PLA2R1       | phospholipase A2 receptor 1                       | ns                 | -4.5   | 2.8    |
|   |   |   | EMCN         | endomucin                                         | ns                 | -4.5   | 3.9    |
|   |   |   | CCN4         | cellular communication network factor 4           | ns                 | -4.5   | 3.6    |
|   |   |   | TLR2         | toll-like receptor 2                              | ns                 | -4.5   | 4.0    |
|   |   |   | TIPARP       | TCDD-inducible poly(ADP-ribose) polymerase        | ns                 | -4.5   | 2.5    |
|   |   |   | MAP1B        | microtubule associated protein 1B                 | ns                 | -2.1   | 4.5    |
|   |   |   | CD3D         | CD3d molecule, delta (CD3-TCR complex)            | ns                 | -4.5   | 4.3    |
|   |   |   | FOXO1        | forkhead box O1                                   | ns                 | -4.4   | 2.3    |
|   |   |   | HCST         | hematopoietic cell signal transducer              | ns                 | -3.2   | 4.4    |
|   |   |   | PRKACB       | protein kinase, cAMP-dependent, catalytic, beta   | ns                 | -3.0   | 4.4    |
|   |   |   | ANOS1        | anosmin 1                                         | ns                 | -4.4   | 2.6    |
|   |   |   | LOC105369863 | uncharacterized LOC105369863                      | ns                 | -3.7   | 4.4    |
|   |   |   | DDR2         | discoidin domain receptor tyrosine kinase 2       | ns                 | -3.3   | 4.4    |
|   |   |   | LOC101926934 | uncharacterized LOC101926934                      | ns                 | -4.4   | 3.2    |
|   |   |   | CCL23        | chemokine (C-C motif) ligand 23                   | ns                 | -3.4   | 4.4    |
|   |   |   | VWF          | von Willebrand factor                             | ns                 | -2.7   | 4.4    |
|   |   |   | LOC101927414 | uncharacterized LOC101927414                      | ns                 | -2.8   | 4.4    |
|   |   |   | IFI16        | interferon, gamma-inducible protein 16            | ns                 | -2.4   | 4.4    |
|   |   |   | EMP1         | epithelial membrane protein 1                     | ns                 | -2.3   | 4.4    |
|   |   |   | FBLN5        | fibulin 5                                         | ns                 | -4.3   | 4.4    |
|   |   |   | MIR4263      | microRNA 4263                                     | ns                 | -3.5   | 4.3    |
|   |   |   | PCBD1        | pterin-4 alpha-carbinolamine dehydratase          | ns                 | -3.0   | 4.3    |
|   |   |   | STK39        | serine threonine kinase 39                        | ns                 | -3.4   | 4.3    |
|   |   |   | OLFML2B      | olfactomedin like 2B                              | ns                 | -2.6   | 4.3    |
|   |   |   | RNF144B      | ring finger protein 144B                          | ns                 | -4.3   | 3.1    |
|   |   |   | RGCC         | regulator of cell cycle                           | ns                 | -4.2   | 3.8    |
|   |   |   | LSAMP        | limbic system-associated membrane protein         | ns                 | -4.1   | 4.2    |
|   |   |   | LOC100505851 | uncharacterized LOC100505851                      | ns                 | -4.2   | 2.2    |
|   |   |   | DPYD-AS1     | DPYD antisense RNA 1                              | ns                 | -4.2   | 3.8    |
|   |   |   | JUN          | jun proto-oncogene                                | ns                 | -3.4   | 4.2    |
|   |   |   | CCL4L1       | chemokine (C-C motif) ligand 4-like 1             | ns                 | -3.7   | 4.2    |
|   |   |   | COPZ2        | coatamer protein complex subunit zeta 2           | ns                 | -4.2   | 3.0    |



| S | C | E | Symbol       | Name                                                                                                          | Linear Fold Change |        |        |
|---|---|---|--------------|---------------------------------------------------------------------------------------------------------------|--------------------|--------|--------|
|   |   |   |              |                                                                                                               | S vs C             | S vs E | E vs C |
|   |   |   | IFITM2       | interferon induced transmembrane protein 2                                                                    | ns                 | -2.4   | 4.2    |
|   |   |   | LPAR1        | lysophosphatidic acid receptor 1                                                                              | ns                 | -2.4   | 4.2    |
|   |   |   | IL13RA2      | interleukin 13 receptor, alpha 2                                                                              | ns                 | -4.2   | 3.9    |
|   |   |   | ALDH1A2      | aldehyde dehydrogenase 1 family, member A2                                                                    | ns                 | -4.2   | 2.9    |
|   |   |   | WNT5A        | wingless-type MMTV integration site family, member 5A                                                         | ns                 | -3.1   | 4.2    |
|   |   |   | TPST1        | tyrosylprotein sulfotransferase 1                                                                             | ns                 | -3.9   | 4.1    |
|   |   |   | ST6GALNAC3   | ST6 (alpha-N-acetyl-neuraminyl-2,3-beta-galactosyl-1,3)-N-acetylgalactosaminide alpha-2,6-sialyltransferase 3 | ns                 | -2.9   | 4.1    |
|   |   |   | PDGFRB       | platelet-derived growth factor receptor, beta polypeptide                                                     | ns                 | -2.3   | 4.1    |
|   |   |   | CXCL11       | chemokine (C-X-C motif) ligand 11                                                                             | ns                 | -4.1   | 3.0    |
|   |   |   | PTGER4       | prostaglandin E receptor 4 (subtype EP4)                                                                      | ns                 | -4.1   | 3.3    |
|   |   |   | ARL4D        | ADP-ribosylation factor like GTPase 4D                                                                        | ns                 | -4.1   | 3.3    |
|   |   |   | PTGDR        | prostaglandin D2 receptor (DP)                                                                                | ns                 | -4.1   | 3.6    |
|   |   |   | GNPDA2       | glucosamine-6-phosphate deaminase 2                                                                           | ns                 | -3.2   | 4.1    |
|   |   |   | FAP          | fibroblast activation protein alpha                                                                           | ns                 | -3.7   | 4.1    |
|   |   |   | ZNF667-AS1   | ZNF667 antisense RNA 1 (head to head)                                                                         | ns                 | -2.8   | 4.1    |
|   |   |   | APCDD1       | adenomatosis polyposis coli down-regulated 1                                                                  | ns                 | -3.9   | 4.1    |
|   |   |   | FYN          | FYN proto-oncogene, Src family tyrosine kinase                                                                | ns                 | -3.7   | 4.1    |
|   |   |   | CFD          | complement factor D (adipsin)                                                                                 | ns                 | -3.5   | 4.0    |
|   |   |   | ARMC9        | armadillo repeat containing 9                                                                                 | ns                 | -3.3   | 4.0    |
|   |   |   | RRAS         | related RAS viral (r-ras) oncogene homolog                                                                    | ns                 | -4.0   | 3.0    |
|   |   |   | ARHGAP15     | Rho GTPase activating protein 15                                                                              | ns                 | -3.2   | 4.0    |
|   |   |   | MSR1         | macrophage scavenger receptor 1                                                                               | ns                 | -4.0   | 2.9    |
|   |   |   | INPP4B       | inositol polyphosphate-4-phosphatase type II B                                                                | ns                 | -3.9   | 3.1    |
|   |   |   | KIR2DL4      | killer cell immunoglobulin-like receptor, two domains, long cytoplasmic tail, 4                               | ns                 | -3.9   | 3.8    |
|   |   |   | CXCL12       | chemokine (C-X-C motif) ligand 12                                                                             | ns                 | -3.9   | 3.0    |
|   |   |   | XGY2         | Xg pseudogene, Y-linked 2                                                                                     | ns                 | -3.7   | 3.9    |
|   |   |   | CILP         | cartilage intermediate layer protein, nucleotide pyrophosphohydrolase                                         | ns                 | -3.9   | 3.1    |
|   |   |   | SLC25A30     | solute carrier family 25, member 30                                                                           | ns                 | -3.9   | 2.3    |
|   |   |   | TRGC2        | T cell receptor gamma constant 2                                                                              | ns                 | -3.2   | 3.9    |
|   |   |   | TRGV9        | T cell receptor gamma variable 9                                                                              | ns                 | -3.2   | 3.9    |
|   |   |   | TIMP4        | TIMP metalloproteinase inhibitor 4                                                                            | ns                 | -3.9   | 2.9    |
|   |   |   | CCL3L3       | chemokine (C-C motif) ligand 3-like 3                                                                         | ns                 | -3.9   | 3.4    |
|   |   |   | IL18         | interleukin 18                                                                                                | ns                 | -3.9   | 3.4    |
|   |   |   | PLA1A        | phospholipase A1 member A                                                                                     | ns                 | -2.8   | 3.9    |
|   |   |   | PIK3CG       | phosphatidylinositol-4,5-bisphosphate 3-kinase, catalytic subunit gamma                                       | ns                 | -3.3   | 3.9    |
|   |   |   | FAM155A      | family with sequence similarity 155, member A                                                                 | ns                 | -3.8   | 3.4    |
|   |   |   | BIRC3        | baculoviral IAP repeat containing 3                                                                           | ns                 | -3.8   | 3.0    |
|   |   |   | APBB1IP      | amyloid beta (A4) precursor protein-binding, family B, member 1 interacting protein                           | ns                 | -3.8   | 2.1    |
|   |   |   | SKAP1        | src kinase associated phosphoprotein 1                                                                        | ns                 | -3.8   | 3.2    |
|   |   |   | CD58         | CD58 molecule                                                                                                 | ns                 | -2.6   | 3.8    |
|   |   |   | FAM229B      | family with sequence similarity 229, member B                                                                 | ns                 | -2.7   | 3.8    |
|   |   |   | CFAP300      | cilia and flagella associated protein 300                                                                     | ns                 | -3.7   | 3.8    |
|   |   |   | AOAH         | acyloxyacyl hydrolase (neutrophil)                                                                            | ns                 | -3.2   | 3.8    |
|   |   |   | CLECL1       | C-type lectin-like 1                                                                                          | ns                 | -3.8   | 3.6    |
|   |   |   | CD209        | CD209 molecule                                                                                                | ns                 | -2.8   | 3.8    |
|   |   |   | GADD45A      | growth arrest and DNA-damage-inducible, alpha                                                                 | ns                 | -3.8   | 2.1    |
|   |   |   | SIPA1L2      | signal-induced proliferation-associated 1 like 2                                                              | ns                 | -3.7   | 3.8    |
|   |   |   | IL1B         | interleukin 1 beta                                                                                            | ns                 | -3.1   | 3.8    |
|   |   |   | P2RY10       | purinergic receptor P2Y, G-protein coupled, 10                                                                | ns                 | -3.8   | 2.8    |
|   |   |   | ZNF804A      | zinc finger protein 804A                                                                                      | ns                 | -3.7   | 3.4    |
|   |   |   | PYHIN1       | pyrin and HIN domain family, member 1                                                                         | ns                 | -3.7   | 3.1    |
|   |   |   | NIPAL2       | NIPA-like domain containing 2                                                                                 | ns                 | -3.7   | 3.2    |
|   |   |   | LOC102723721 | uncharacterized LOC102723721                                                                                  | ns                 | -3.7   | 3.1    |
|   |   |   | GLIDR        | glioblastoma down-regulated RNA                                                                               | ns                 | -3.0   | 3.7    |
|   |   |   | PAMR1        | peptidase domain containing associated with muscle regeneration 1                                             | ns                 | -3.7   | 3.4    |

| S | C | E | Symbol       | Name                                                                   | Linear Fold Change |        |        |
|---|---|---|--------------|------------------------------------------------------------------------|--------------------|--------|--------|
|   |   |   |              |                                                                        | S vs C             | S vs E | E vs C |
|   |   |   | LOC101928461 | uncharacterized LOC101928461                                           | ns                 | -3.7   | 3.4    |
|   |   |   | IL18R1       | interleukin 18 receptor 1                                              | ns                 | -3.7   | 2.8    |
|   |   |   | MNDA         | myeloid cell nuclear differentiation antigen                           | ns                 | -3.7   | 3.2    |
|   |   |   | SNORA78      | small nucleolar RNA, H                                                 | ns                 | -3.4   | 3.6    |
|   |   |   | UCHL1        | ubiquitin C-terminal hydrolase L1                                      | ns                 | -3.6   | 3.1    |
|   |   |   | TPM2         | tropomyosin 2 (beta)                                                   | ns                 | -3.2   | 3.6    |
|   |   |   | CD48         | CD48 molecule                                                          | ns                 | -3.6   | 3.5    |
|   |   |   | ZNF25        | zinc finger protein 25                                                 | ns                 | -2.8   | 3.6    |
|   |   |   | CDA          | cytidine deaminase                                                     | ns                 | -3.6   | 2.9    |
|   |   |   | KCNH1        | potassium channel, voltage gated eag related subfamily H, member 1     | ns                 | -3.6   | 3.0    |
|   |   |   | PWWP3B       | PWWP domain containing 3B                                              | ns                 | -3.4   | 3.5    |
|   |   |   | NPR1         | natriuretic peptide receptor 1                                         | ns                 | -2.7   | 3.5    |
|   |   |   | SOD2         | superoxide dismutase 2, mitochondrial                                  | ns                 | -3.5   | 2.7    |
|   |   |   | TASL         | TLR adaptor interacting with endolysosomal SLC15A4                     | ns                 | -3.3   | 3.5    |
|   |   |   | TAGAP        | T-cell activation RhoGTPase activating protein                         | ns                 | -2.8   | 3.5    |
|   |   |   | DOCK2        | dedicator of cytokinesis 2                                             | ns                 | -2.6   | 3.5    |
|   |   |   | SEMA3B-AS1   | SEMA3B antisense RNA 1 (head to head)                                  | ns                 | -3.5   | 2.9    |
|   |   |   | MPZL2        | myelin protein zero-like 2                                             | ns                 | -3.3   | 3.5    |
|   |   |   | RASD1        | RAS, dexamethasone-induced 1                                           | ns                 | -3.5   | 2.6    |
|   |   |   | PRPS1        | phosphoribosyl pyrophosphate synthetase 1                              | ns                 | -3.5   | 2.3    |
|   |   |   | MDM1         | Mdm1 nuclear protein                                                   | ns                 | -2.7   | 3.5    |
|   |   |   | OXT          | oxytocin                                                               | ns                 | -3.5   | 2.9    |
|   |   |   | BRINP2       | bone morphogenetic protein                                             | ns                 | -3.5   | 2.2    |
|   |   |   | TNC          | tenascin C                                                             | ns                 | -3.5   | 2.3    |
|   |   |   | C8orf88      | chromosome 8 open reading frame 88                                     | ns                 | -2.6   | 3.5    |
|   |   |   | SLC46A3      | solute carrier family 46, member 3                                     | ns                 | -3.2   | 3.4    |
|   |   |   | EMX2         | empty spiracles homeobox 2                                             | ns                 | -3.4   | 2.8    |
|   |   |   | DNLZ         | DNL-type zinc finger                                                   | ns                 | -3.4   | 2.7    |
|   |   |   | ID4          | inhibitor of DNA binding 4, dominant negative helix-loop-helix protein | ns                 | -3.4   | 3.1    |
|   |   |   | TAGLN        | transgelin                                                             | ns                 | -3.1   | 3.4    |
|   |   |   | SORL1        | sortilin-related receptor, L(DLR class) A repeats containing           | ns                 | -2.8   | 3.4    |
|   |   |   | FOLR2        | folate receptor 2 (fetal)                                              | ns                 | -2.2   | 3.4    |
|   |   |   | POLR1F       | RNA polymerase I subunit F                                             | ns                 | -2.9   | 3.4    |
|   |   |   | TMSB4X       | thymosin beta 4, X-linked                                              | ns                 | -3.4   | 3.3    |
|   |   |   | TRPS1        | trichorhinophalangeal syndrome I                                       | ns                 | -2.4   | 3.4    |
|   |   |   | ZBTB20       | zinc finger and BTB domain containing 20                               | ns                 | -2.2   | 3.4    |
|   |   |   | WDR41        | WD repeat domain 41                                                    | ns                 | -3.4   | 2.9    |
|   |   |   | LOC101928100 | uncharacterized LOC101928100                                           | ns                 | -2.7   | 3.3    |
|   |   |   | TP53I3       | tumor protein p53 inducible protein 3                                  | ns                 | -3.0   | 3.3    |
|   |   |   | ADA2         | adenosine deaminase 2                                                  | ns                 | -2.7   | 3.3    |
|   |   |   | QPCT         | glutamyl-peptide cyclotransferase                                      | ns                 | -3.3   | 3.2    |
|   |   |   | PLAT         | plasminogen activator, tissue                                          | ns                 | -3.3   | 2.7    |
|   |   |   | TNFSF13B     | tumor necrosis factor (ligand) superfamily, member 13b                 | ns                 | -3.0   | 3.3    |
|   |   |   | SPAG1        | sperm associated antigen 1                                             | ns                 | -3.3   | 2.9    |
|   |   |   | ABLIM3       | actin binding LIM protein family, member 3                             | ns                 | -2.7   | 3.2    |
|   |   |   | LINC00924    | long intergenic non-protein coding RNA 924                             | ns                 | -3.2   | 2.8    |
|   |   |   | GSTM5        | glutathione S-transferase mu 5                                         | ns                 | -3.2   | 3.0    |
|   |   |   | ALCAM        | activated leukocyte cell adhesion molecule                             | ns                 | -2.1   | 3.2    |
|   |   |   | NCOA7        | nuclear receptor coactivator 7                                         | ns                 | -3.2   | 3.2    |
|   |   |   | LCP1         | lymphocyte cytosolic protein 1 (L-plastin)                             | ns                 | -2.5   | 3.2    |
|   |   |   | PRSS23       | protease, serine, 23                                                   | ns                 | -3.2   | 3.1    |
|   |   |   | ACSL1        | acyl-CoA synthetase long-chain family member 1                         | ns                 | -2.3   | 3.2    |
|   |   |   | SMIM10       | small integral membrane protein 10                                     | ns                 | -3.2   | 3.2    |
|   |   |   | LSAMP-AS1    | uncharacterized LOC101926903                                           | ns                 | -3.2   | 2.6    |
|   |   |   | SNCAIP       | synuclein alpha interacting protein                                    | ns                 | -3.2   | 2.9    |

| S | C | E | Symbol      | Name                                                                                  | Linear Fold Change |        |        |
|---|---|---|-------------|---------------------------------------------------------------------------------------|--------------------|--------|--------|
|   |   |   |             |                                                                                       | S vs C             | S vs E | E vs C |
|   |   |   | PLD1        | phospholipase D1, phosphatidylcholine-specific                                        | ns                 | -3.2   | 2.6    |
|   |   |   | MCC         | mutated in colorectal cancers                                                         | ns                 | -2.4   | 3.2    |
|   |   |   | ARMCX1      | armadillo repeat containing, X-linked 1                                               | ns                 | -2.2   | 3.2    |
|   |   |   | CLEC2D      | C-type lectin domain family 2, member D                                               | ns                 | -3.2   | 2.6    |
|   |   |   | LGALS1      | lectin, galactoside-binding, soluble, 1                                               | ns                 | -2.7   | 3.2    |
|   |   |   | UG0898H09   | uncharacterized LOC643763                                                             | ns                 | -2.9   | 3.2    |
|   |   |   | SAMHD1      | SAM domain and HD domain 1                                                            | ns                 | -2.7   | 3.2    |
|   |   |   | HLA-DMB     | major histocompatibility complex, class II, DM beta                                   | ns                 | -3.0   | 3.2    |
|   |   |   | MANEA       | mannosidase, endo-alpha                                                               | ns                 | -3.1   | 2.5    |
|   |   |   | JAKMIP2     | janus kinase and microtubule interacting protein 2                                    | ns                 | -3.0   | 3.1    |
|   |   |   | MEF2A       | myocyte enhancer factor 2A                                                            | ns                 | -2.5   | 3.1    |
|   |   |   | C2CD4B      | C2 calcium-dependent domain containing 4B                                             | ns                 | -2.4   | 3.1    |
|   |   |   | MIR99AHG    | mir-99a-let-7c cluster host gene                                                      | ns                 | -2.9   | 3.1    |
|   |   |   | HLA-DPB1    | major histocompatibility complex, class II, DP beta 1                                 | ns                 | -3.1   | 2.4    |
|   |   |   | WNT4        | wingless-type MMTV integration site family, member 4                                  | ns                 | -3.1   | 2.2    |
|   |   |   | C1RL        | complement component 1, r subcomponent-like                                           | ns                 | -3.1   | 2.2    |
|   |   |   | PRXL2A      | peroxiredoxin like 2A                                                                 | ns                 | -2.5   | 3.1    |
|   |   |   | EVI2B       | ecotropic viral integration site 2B                                                   | ns                 | -3.0   | 3.1    |
|   |   |   | RCBTB1      | regulator of chromosome condensation (RCC1) and BTB (POZ) domain containing protein 1 | ns                 | -3.1   | 2.3    |
|   |   |   | KATNAL1     | katanin p60 subunit A-like 1                                                          | ns                 | -2.5   | 3.1    |
|   |   |   | MID2        | midline 2                                                                             | ns                 | -2.2   | 3.1    |
|   |   |   | ADAMTS2     | ADAM metalloproteinase with thrombospondin type 1 motif 2                             | ns                 | -2.9   | 3.0    |
|   |   |   | INE2        | inactivation escape 2 (non-protein coding)                                            | ns                 | -3.0   | 2.3    |
|   |   |   | KCNK6       | potassium channel, two pore domain subfamily K, member 6                              | ns                 | -2.8   | 3.0    |
|   |   |   | GALNT13     | polypeptide N-acetylgalactosaminyltransferase 13                                      | ns                 | -3.0   | 2.4    |
|   |   |   | PTGDS       | prostaglandin D2 synthase 21kDa (brain)                                               | ns                 | -3.0   | 2.3    |
|   |   |   | RAI2        | retinoic acid induced 2                                                               | ns                 | -3.0   | 2.3    |
|   |   |   | SIGLEC7     | sialic acid binding Ig-like lectin 7                                                  | ns                 | -2.3   | 3.0    |
|   |   |   | EDNRB       | endothelin receptor type B                                                            | ns                 | -3.0   | 2.2    |
|   |   |   | MSANTD4     | Myb                                                                                   | ns                 | -2.5   | 3.0    |
|   |   |   | CLEC14A     | C-type lectin domain family 14, member A                                              | ns                 | -2.4   | 3.0    |
|   |   |   | FBLN2       | fibulin 2                                                                             | ns                 | -3.0   | 2.4    |
|   |   |   | S100A16     | S100 calcium binding protein A16                                                      | ns                 | -2.3   | 3.0    |
|   |   |   | CYBRD1      | cytochrome b reductase 1                                                              | ns                 | -2.8   | 3.0    |
|   |   |   | FAM155A-IT1 | FAM155A intronic transcript 1                                                         | ns                 | -3.0   | 2.8    |
|   |   |   | CORIN       | corin, serine peptidase                                                               | ns                 | -2.9   | 3.0    |
|   |   |   | MLLT11      | myeloid                                                                               | ns                 | -3.0   | 2.9    |
|   |   |   | TMEM220     | transmembrane protein 220                                                             | ns                 | -3.0   | 2.7    |
|   |   |   | RGL1        | ral guanine nucleotide dissociation stimulator-like 1                                 | ns                 | -2.1   | 3.0    |
|   |   |   | SAMD3       | sterile alpha motif domain containing 3                                               | ns                 | -3.0   | 2.1    |
|   |   |   | EPHX4       | epoxide hydrolase 4                                                                   | ns                 | -2.3   | 3.0    |
|   |   |   | DNASE1L3    | deoxyribonuclease I-like 3                                                            | ns                 | -3.0   | 2.2    |
|   |   |   | NFE2L1      | nuclear factor, erythroid 2-like 1                                                    | ns                 | -2.9   | 2.4    |
|   |   |   | KIR2DS3     | killer cell immunoglobulin-like receptor, two domains, short cytoplasmic tail, 3      | ns                 | -2.9   | 2.5    |
|   |   |   | ITGAX       | integrin alpha X                                                                      | ns                 | -2.9   | 2.8    |
|   |   |   | HAVCR2      | hepatitis A virus cellular receptor 2                                                 | ns                 | -2.2   | 2.9    |
|   |   |   | CRYZ        | crystallin zeta                                                                       | ns                 | -2.4   | 2.9    |
|   |   |   | NR1D1       | nuclear receptor subfamily 1, group D, member 1                                       | ns                 | -2.9   | 2.8    |
|   |   |   | TTC30A      | tetratricopeptide repeat domain 30A                                                   | ns                 | -2.9   | 2.9    |
|   |   |   | EOGT        | EGF domain-specific O-linked N-acetylglucosamine (GlcNAc) transferase                 | ns                 | -2.1   | 2.9    |
|   |   |   | KALRN       | kalirin, RhoGEF kinase                                                                | ns                 | -2.3   | 2.8    |
|   |   |   | SMOX        | spermine oxidase                                                                      | ns                 | -2.8   | 2.8    |
|   |   |   | OSBPL1A     | oxysterol binding protein-like 1A                                                     | ns                 | -2.2   | 2.8    |
|   |   |   | CFL2        | cofilin 2 (muscle)                                                                    | ns                 | -2.8   | 2.3    |
|   |   |   | DNAAF4      | dynein axonemal assembly factor 4                                                     | ns                 | -2.4   | 2.8    |

| S | C | E | Symbol       | Name                                                                                                          | Linear Fold Change |        |        |
|---|---|---|--------------|---------------------------------------------------------------------------------------------------------------|--------------------|--------|--------|
|   |   |   |              |                                                                                                               | S vs C             | S vs E | E vs C |
|   |   |   | RNF138P1     | ring finger protein 138, E3 ubiquitin protein ligase pseudogene 1                                             | ns                 | -2.5   | 2.8    |
|   |   |   | IRS2         | insulin receptor substrate 2                                                                                  | ns                 | -2.8   | 2.4    |
|   |   |   | LOC105376272 | uncharacterized LOC105376272                                                                                  | ns                 | -2.6   | 2.8    |
|   |   |   | ARL3         | ADP-ribosylation factor like GTPase 3                                                                         | ns                 | -2.8   | 2.3    |
|   |   |   | CCL3         | chemokine (C-C motif) ligand 3                                                                                | ns                 | -2.3   | 2.8    |
|   |   |   | S1PR4        | sphingosine-1-phosphate receptor 4                                                                            | ns                 | -2.2   | 2.8    |
|   |   |   | FAM110C      | family with sequence similarity 110, member C                                                                 | ns                 | -2.4   | 2.8    |
|   |   |   | HLA-DMA      | major histocompatibility complex, class II, DM alpha                                                          | ns                 | -2.7   | 2.0    |
|   |   |   | NIBAN1       | niban apoptosis regulator 1                                                                                   | ns                 | -2.7   | 2.2    |
|   |   |   | LOC100507195 | uncharacterized LOC100507195                                                                                  | ns                 | -2.7   | 2.4    |
|   |   |   | ZNF287       | zinc finger protein 287                                                                                       | ns                 | -2.2   | 2.7    |
|   |   |   | NUPR1        | nuclear protein 1, transcriptional regulator                                                                  | ns                 | -2.7   | 2.3    |
|   |   |   | ATP2B4       | ATPase, Ca <sup>++</sup> transporting, plasma membrane 4                                                      | ns                 | -2.5   | 2.7    |
|   |   |   | TMEM98       | transmembrane protein 98                                                                                      | ns                 | -2.3   | 2.7    |
|   |   |   | TMEM35B      | transmembrane protein 35B                                                                                     | ns                 | -2.5   | 2.7    |
|   |   |   | C15orf65     | chromosome 15 open reading frame 65                                                                           | ns                 | -2.1   | 2.7    |
|   |   |   | CELF2        | CUGBP, Elav-like family member 2                                                                              | ns                 | -2.5   | 2.7    |
|   |   |   | CERK         | ceramide kinase                                                                                               | ns                 | -2.7   | 2.2    |
|   |   |   | TLR6         | toll-like receptor 6                                                                                          | ns                 | -2.5   | 2.7    |
|   |   |   | SLFN12       | schlafen family member 12                                                                                     | ns                 | -2.7   | 2.4    |
|   |   |   | GJA1         | gap junction protein alpha 1                                                                                  | ns                 | -2.7   | 2.6    |
|   |   |   | IL2RA        | interleukin 2 receptor, alpha                                                                                 | ns                 | -2.7   | 2.6    |
|   |   |   | ZNF438       | zinc finger protein 438                                                                                       | ns                 | -2.6   | 2.2    |
|   |   |   | HLA-A        | major histocompatibility complex, class I, A                                                                  | ns                 | -2.6   | 2.2    |
|   |   |   | SOD3         | superoxide dismutase 3, extracellular                                                                         | ns                 | -2.6   | 2.6    |
|   |   |   | CHST2        | carbohydrate (N-acetylglucosamine-6-O) sulfotransferase 2                                                     | ns                 | -2.1   | 2.6    |
|   |   |   | ZNF516       | zinc finger protein 516                                                                                       | ns                 | -2.6   | 2.5    |
|   |   |   | RBKS         | ribokinase                                                                                                    | ns                 | -2.6   | 2.3    |
|   |   |   | C1orf162     | chromosome 1 open reading frame 162                                                                           | ns                 | -2.2   | 2.6    |
|   |   |   | MRPL33       | mitochondrial ribosomal protein L33                                                                           | ns                 | -2.6   | 2.3    |
|   |   |   | CDKN2C       | cyclin-dependent kinase inhibitor 2C (p18, inhibits CDK4)                                                     | ns                 | -2.1   | 2.6    |
|   |   |   | KANK2        | KN motif and ankyrin repeat domains 2                                                                         | ns                 | -2.6   | 2.5    |
|   |   |   | GLB1L        | galactosidase beta 1 like                                                                                     | ns                 | -2.6   | 2.0    |
|   |   |   | CH25H        | cholesterol 25-hydroxylase                                                                                    | ns                 | -2.6   | 2.5    |
|   |   |   | ALDH3A2      | aldehyde dehydrogenase 3 family, member A2                                                                    | ns                 | -2.3   | 2.6    |
|   |   |   | PLXNC1       | plexin C1                                                                                                     | ns                 | -2.3   | 2.5    |
|   |   |   | SELPLG       | selectin P ligand                                                                                             | ns                 | -2.1   | 2.5    |
|   |   |   | STAB1        | stabilin 1                                                                                                    | ns                 | -2.0   | 2.5    |
|   |   |   | HLA-DPB2     | major histocompatibility complex, class II, DP beta 2 (pseudogene)                                            | ns                 | -2.5   | 2.1    |
|   |   |   | CACNB2       | calcium channel, voltage-dependent, beta 2 subunit                                                            | ns                 | -2.5   | 2.2    |
|   |   |   | ALKBH3       | alkB homolog 3, alpha-ketoglutarate-dependent dioxygenase                                                     | ns                 | -2.1   | 2.5    |
|   |   |   | LY75-CD302   | LY75-CD302 readthrough                                                                                        | ns                 | -2.5   | 2.3    |
|   |   |   | TGFBR2       | transforming growth factor beta receptor II                                                                   | ns                 | -2.0   | 2.5    |
|   |   |   | XG           | Xg blood group                                                                                                | ns                 | -2.5   | 2.1    |
|   |   |   | ZNF271P      | zinc finger protein 271, pseudogene                                                                           | ns                 | -2.5   | 2.3    |
|   |   |   | GLIPR2       | GLI pathogenesis-related 2                                                                                    | ns                 | -2.4   | 2.5    |
|   |   |   | SCIMP        | SLP adaptor and CSK interacting membrane protein                                                              | ns                 | -2.3   | 2.5    |
|   |   |   | EFEMP2       | EGF containing fibulin-like extracellular matrix protein 2                                                    | ns                 | -2.0   | 2.5    |
|   |   |   | ST6GALNAC6   | ST6 (alpha-N-acetyl-neuraminyl-2,3-beta-galactosyl-1,3)-N-acetylgalactosaminide alpha-2,6-sialyltransferase 6 | ns                 | -2.4   | 2.4    |
|   |   |   | LARGE1       | LARGE xylosyl- and glucuronyltransferase 1                                                                    | ns                 | -2.2   | 2.4    |
|   |   |   | ADCY1        | adenylate cyclase 1 (brain)                                                                                   | ns                 | -2.1   | 2.4    |
|   |   |   | LOC105372674 | uncharacterized LOC105372674                                                                                  | ns                 | -2.4   | 2.4    |
|   |   |   | SSC5D        | scavenger receptor cysteine rich family, 5 domains                                                            | ns                 | -2.3   | 2.4    |
|   |   |   | TMX4         | thioredoxin-related transmembrane protein 4                                                                   | ns                 | -2.1   | 2.4    |
|   |   |   | PBX3         | pre-B-cell leukemia homeobox 3                                                                                | ns                 | -2.1   | 2.4    |



| S | C | E | Symbol       | Name                                                                         | Linear Fold Change |        |        |
|---|---|---|--------------|------------------------------------------------------------------------------|--------------------|--------|--------|
|   |   |   |              |                                                                              | S vs C             | S vs E | E vs C |
|   |   |   | RIN2         | Ras and Rab interactor 2                                                     | ns                 | -2.3   | 2.4    |
|   |   |   | TCN2         | transcobalamin II                                                            | ns                 | -2.2   | 2.4    |
|   |   |   | TRGV8        | T cell receptor gamma variable 8                                             | ns                 | -2.4   | 2.2    |
|   |   |   | IMPA1        | inositol(myo)-1(or 4)-monophosphate 1                                        | ns                 | -2.3   | 2.4    |
|   |   |   | KRT37        | keratin 37, type I                                                           | ns                 | -2.4   | 2.3    |
|   |   |   | SIGLEC14     | sialic acid binding Ig-like lectin 14                                        | ns                 | -2.3   | 2.1    |
|   |   |   | BMERB1       | bMERB domain containing 1                                                    | ns                 | -2.3   | 2.2    |
|   |   |   | SNAP91       | synaptosome associated protein 91kDa                                         | ns                 | -2.2   | 2.3    |
|   |   |   | SGPL1        | sphingosine-1-phosphate lyase 1                                              | ns                 | -2.3   | 2.3    |
|   |   |   | RNASET2      | ribonuclease T2                                                              | ns                 | -2.3   | 2.1    |
|   |   |   | FCGR2A       | Fc fragment of IgG, low affinity IIa, receptor (CD32)                        | ns                 | -2.2   | 2.3    |
|   |   |   | DNAJC12      | DnaJ (Hsp40) homolog, subfamily C, member 12                                 | ns                 | -2.3   | 2.2    |
|   |   |   | ICAM1        | intercellular adhesion molecule 1                                            | ns                 | -2.3   | 2.3    |
|   |   |   | NECTIN2      | nectin cell adhesion molecule 2                                              | ns                 | -2.3   | 2.1    |
|   |   |   | TARS3        | threonyl-tRNA synthetase 3                                                   | ns                 | -2.3   | 2.2    |
|   |   |   | CTSD         | cathepsin D                                                                  | ns                 | -2.2   | 2.3    |
|   |   |   | CD83         | CD83 molecule                                                                | ns                 | -2.1   | 2.3    |
|   |   |   | ATL1         | atlastin GTPase 1                                                            | ns                 | -2.3   | 2.1    |
|   |   |   | AKAP6        | A kinase (PRKA) anchor protein 6                                             | ns                 | -2.2   | 2.2    |
|   |   |   | PLLP         | plasmalipin                                                                  | ns                 | -2.2   | 2.2    |
|   |   |   | GANC         | glucosidase, alpha; neutral C                                                | ns                 | -2.2   | 2.0    |
|   |   |   | PRNP         | prion protein                                                                | ns                 | -2.1   | 2.1    |
|   |   |   | PLXND1       | plexin D1                                                                    | ns                 | -2.1   | 2.1    |
|   |   |   | HCK          | HCK proto-oncogene, Src family tyrosine kinase                               | ns                 | -2.1   | 2.1    |
|   |   |   | PLXNA4       | plexin A4                                                                    | ns                 | -2.1   | 2.1    |
|   |   |   | ASAP2        | ArfGAP with SH3 domain, ankyrin repeat and PH domain 2                       | ns                 | -2.1   | 2.0    |
|   |   |   | PIRC66       | piwi-interacting RNA cluster 66                                              | ns                 | 151.3  | -86.8  |
|   |   |   | CGB8         | chorionic gonadotropin, beta polypeptide 8                                   | ns                 | 89.1   | -106.9 |
|   |   |   | BMP5         | bone morphogenetic protein 5                                                 | ns                 | 86.0   | -21.1  |
|   |   |   | F5           | coagulation factor V (proaccelerin, labile factor)                           | ns                 | 74.3   | -20.0  |
|   |   |   | EGFL6        | EGF-like-domain, multiple 6                                                  | ns                 | 70.0   | -15.5  |
|   |   |   | CYP19A1      | cytochrome P450, family 19, subfamily A, polypeptide 1                       | ns                 | 61.7   | -29.4  |
|   |   |   | MIR1323      | microRNA 1323                                                                | ns                 | 47.1   | -30.7  |
|   |   |   | LGALS13      | lectin, galactoside-binding, soluble, 13                                     | ns                 | 43.7   | -16.5  |
|   |   |   | CGB3         | chorionic gonadotropin subunit beta 3                                        | ns                 | 23.5   | -33.7  |
|   |   |   | LGALS16      | lectin, galactoside-binding, soluble, 16                                     | ns                 | 29.7   | -12.0  |
|   |   |   | HSD3B1       | hydroxy-delta-5-steroid dehydrogenase, 3 beta- and steroid delta-isomerase 1 | ns                 | 29.7   | -12.6  |
|   |   |   | DSC3         | desmocollin 3                                                                | ns                 | 27.2   | -21.8  |
|   |   |   | TFPI2        | tissue factor pathway inhibitor 2                                            | ns                 | 26.0   | -18.3  |
|   |   |   | HGF          | hepatocyte growth factor (hepapoietin A; scatter factor)                     | ns                 | 24.1   | -7.8   |
|   |   |   | PAGE4        | P antigen family, member 4 (prostate associated)                             | ns                 | 19.2   | -10.6  |
|   |   |   | DLK1         | delta-like 1 homolog (Drosophila)                                            | ns                 | 17.7   | -9.6   |
|   |   |   | MUC15        | mucin 15, cell surface associated                                            | ns                 | 16.9   | -10.2  |
|   |   |   | C21orf91-OT1 | C21orf91 overlapping transcript 1                                            | ns                 | 16.5   | -4.3   |
|   |   |   | ANGPT2       | angiopoietin 2                                                               | ns                 | 15.9   | -6.4   |
|   |   |   | CDO1         | cysteine dioxygenase type 1                                                  | ns                 | 15.4   | -9.9   |
|   |   |   | SPTLC3       | serine palmitoyltransferase, long chain base subunit 3                       | ns                 | 14.1   | -7.7   |
|   |   |   | ERVW-1       | endogenous retrovirus group W, member 1                                      | ns                 | 13.6   | -6.9   |
|   |   |   | OLAH         | oleoyl-ACP hydrolase                                                         | ns                 | 13.3   | -6.1   |
|   |   |   | STS          | steroid sulfatase (microsomal), isozyme S                                    | ns                 | 12.9   | -5.5   |
|   |   |   | RHOBTB1      | Rho-related BTB domain containing 1                                          | ns                 | 12.7   | -5.6   |
|   |   |   | RRS1-AS1     | RRS1 antisense RNA 1 (head to head)                                          | ns                 | 12.5   | -6.0   |
|   |   |   | SLC19A3      | solute carrier family 19 (thiamine transporter), member 3                    | ns                 | 12.3   | -7.1   |
|   |   |   | KATNBL1      | katanin p80 subunit B-like 1                                                 | ns                 | 12.1   | -4.5   |
|   |   |   | SIGLEC6      | sialic acid binding Ig-like lectin 6                                         | ns                 | 9.8    | -12.1  |

| S | C | E | Symbol       | Name                                                                  | Linear Fold Change |        |        |
|---|---|---|--------------|-----------------------------------------------------------------------|--------------------|--------|--------|
|   |   |   |              |                                                                       | S vs C             | S vs E | E vs C |
|   |   |   | LOC729739    | peptidylprolyl isomerase A (cyclophilin A) pseudogene                 | ns                 | 11.9   | -8.3   |
|   |   |   | PRSS12       | protease, serine, 12 (neurotrypsin, motopsin)                         | ns                 | 9.0    | -11.7  |
|   |   |   | ADAMTS6      | ADAM metalloproteinase with thrombospondin type 1 motif 6             | ns                 | 11.7   | -4.7   |
|   |   |   | RADX         | RPA1 related single stranded DNA binding protein, X-linked            | ns                 | 11.6   | -5.0   |
|   |   |   | PCDH10       | protocadherin 10                                                      | ns                 | 11.5   | -5.0   |
|   |   |   | LOC55338     | uncharacterized LOC55338                                              | ns                 | 11.1   | -6.4   |
|   |   |   | CYP2J2       | cytochrome P450, family 2, subfamily J, polypeptide 2                 | ns                 | 7.0    | -11.0  |
|   |   |   | ATP6V1C2     | ATPase, H <sup>+</sup> transporting, lysosomal 42kDa, V1 subunit C2   | ns                 | 10.8   | -6.0   |
|   |   |   | CSF3R        | colony stimulating factor 3 receptor                                  | ns                 | 10.8   | -5.6   |
|   |   |   | PEG3-AS1     | PEG3 antisense RNA 1                                                  | ns                 | 10.4   | -7.8   |
|   |   |   | GLDN         | gliomedin                                                             | ns                 | 10.4   | -4.8   |
|   |   |   | PEG3         | paternally expressed 3                                                | ns                 | 10.0   | -6.5   |
|   |   |   | C7           | complement component 7                                                | ns                 | 9.9    | -5.5   |
|   |   |   | KYNU         | kynureninase                                                          | ns                 | 9.9    | -3.8   |
|   |   |   | LOC101927355 | uncharacterized LOC101927355                                          | ns                 | 9.5    | -3.6   |
|   |   |   | LOC284561    | uncharacterized LOC284561                                             | ns                 | 9.5    | -4.3   |
|   |   |   | SPINT1       | serine peptidase inhibitor, Kunitz type 1                             | ns                 | 9.4    | -6.8   |
|   |   |   | MIR498       | microRNA 498                                                          | ns                 | 9.3    | -7.8   |
|   |   |   | FOXO4        | forkhead box O4                                                       | ns                 | 9.2    | -4.7   |
|   |   |   | INHBA        | inhibin beta A                                                        | ns                 | 6.2    | -9.1   |
|   |   |   | ERVH48-1     | endogenous retrovirus group 48, member 1                              | ns                 | 7.9    | -8.3   |
|   |   |   | SLC19A2      | solute carrier family 19 (thiamine transporter), member 2             | ns                 | 7.9    | -5.6   |
|   |   |   | TP63         | tumor protein p63                                                     | ns                 | 7.9    | -4.8   |
|   |   |   | FHDC1        | FH2 domain containing 1                                               | ns                 | 7.9    | -5.7   |
|   |   |   | TREML2       | triggering receptor expressed on myeloid cells-like 2                 | ns                 | 7.8    | -3.2   |
|   |   |   | KRT23        | keratin 23, type I                                                    | ns                 | 7.5    | -4.8   |
|   |   |   | PSG5         | pregnancy specific beta-1-glycoprotein 5                              | ns                 | 7.5    | -3.2   |
|   |   |   | PSG1         | pregnancy specific beta-1-glycoprotein 1                              | ns                 | 6.9    | -4.0   |
|   |   |   | LOC100505909 | uncharacterized LOC100505909                                          | ns                 | 6.8    | -5.1   |
|   |   |   | LINC00470    | long intergenic non-protein coding RNA 470                            | ns                 | 6.7    | -4.9   |
|   |   |   | CMYA5        | cardiomyopathy associated 5                                           | ns                 | 6.5    | -3.5   |
|   |   |   | LOC101927880 | uncharacterized LOC101927880                                          | ns                 | 6.3    | -6.5   |
|   |   |   | ARHGAP32     | Rho GTPase activating protein 32                                      | ns                 | 6.5    | -2.9   |
|   |   |   | TLR3         | toll-like receptor 3                                                  | ns                 | 6.1    | -6.4   |
|   |   |   | ERVK3-2      | endogenous retrovirus group K3, member 2                              | ns                 | 6.4    | -5.0   |
|   |   |   | SPDYA        | speedy                                                                | ns                 | 6.3    | -4.7   |
|   |   |   | RPS6KA5      | ribosomal protein S6 kinase, 90kDa, polypeptide 5                     | ns                 | 6.1    | -3.5   |
|   |   |   | ZNF732       | zinc finger protein 732                                               | ns                 | 2.5    | -6.0   |
|   |   |   | OPHN1        | oligophrenin 1                                                        | ns                 | 5.9    | -3.0   |
|   |   |   | PLEKHA8P1    | pleckstrin homology domain containing, family A member 8 pseudogene 1 | ns                 | 4.2    | -5.9   |
|   |   |   | LOC105375403 | uncharacterized LOC105375403                                          | ns                 | 5.9    | -2.9   |
|   |   |   | LOC105377871 | uncharacterized LOC105377871                                          | ns                 | 5.9    | -5.0   |
|   |   |   | GLDC         | glycine dehydrogenase (decarboxylating)                               | ns                 | 5.6    | -4.8   |
|   |   |   | GDF15        | growth differentiation factor 15                                      | ns                 | 5.5    | -4.3   |
|   |   |   | DTL          | denticleless E3 ubiquitin protein ligase homolog (Drosophila)         | ns                 | 5.5    | -4.9   |
|   |   |   | ATP10D       | ATPase, class V, type 10D                                             | ns                 | 5.5    | -2.7   |
|   |   |   | DOCK9-AS1    | DOCK9 antisense RNA 1                                                 | ns                 | 5.4    | -4.2   |
|   |   |   | BET1         | Bet1 golgi vesicular membrane trafficking protein                     | ns                 | 5.4    | -2.5   |
|   |   |   | CAPN6        | calpain 6                                                             | ns                 | 5.4    | -4.5   |
|   |   |   | SDC1         | syndecan 1                                                            | ns                 | 5.2    | -2.6   |
|   |   |   | FAM13A       | family with sequence similarity 13, member A                          | ns                 | 5.1    | -3.1   |
|   |   |   | LARGE2       | LARGE xylosyl- and glucuronyltransferase 2                            | ns                 | 5.1    | -3.3   |
|   |   |   | CEMIP2       | cell migration inducing hyaluronidase 2                               | ns                 | 5.1    | -2.3   |
|   |   |   | RNF128       | ring finger protein 128, E3 ubiquitin protein ligase                  | ns                 | 5.1    | -4.5   |
|   |   |   | GPR87        | G protein-coupled receptor 87                                         | ns                 | 2.9    | -5.0   |



| S | C | E | Symbol       | Name                                                                             | Linear Fold Change |        |        |
|---|---|---|--------------|----------------------------------------------------------------------------------|--------------------|--------|--------|
|   |   |   |              |                                                                                  | S vs C             | S vs E | E vs C |
|   |   |   | SPDYE11      | speedy                                                                           | ns                 | 4.9    | -3.2   |
|   |   |   | SPDYE8       | speedy/RINGO cell cycle regulator family member E8                               | ns                 | 4.9    | -3.2   |
|   |   |   | NEBL         | nebullette                                                                       | ns                 | 4.9    | -4.4   |
|   |   |   | SLC7A5       | solute carrier family 7 (amino acid transporter light chain, L system), member 5 | ns                 | 3.8    | -4.8   |
|   |   |   | SLC22A11     | solute carrier family 22 (organic anion                                          | ns                 | 4.8    | -3.0   |
|   |   |   | MTARC1       | mitochondrial amidoxime reducing component 1                                     | ns                 | 4.7    | -3.5   |
|   |   |   | CCNB1        | cyclin B1                                                                        | ns                 | 3.4    | -4.7   |
|   |   |   | DEPDC1       | DEP domain containing 1                                                          | ns                 | 4.6    | -4.2   |
|   |   |   | TPRXL        | tetra-peptide repeat homeobox-like                                               | ns                 | 4.6    | -3.6   |
|   |   |   | FDX1         | ferredoxin 1                                                                     | ns                 | 4.5    | -3.0   |
|   |   |   | LOC101928408 | uncharacterized LOC101928408                                                     | ns                 | 4.5    | -2.4   |
|   |   |   | TOP2A        | topoisomerase (DNA) II alpha                                                     | ns                 | 4.4    | -3.1   |
|   |   |   | ATP6V1B1     | ATPase, H <sup>+</sup> transporting, lysosomal 56                                | ns                 | 4.4    | -2.6   |
|   |   |   | DIAPH3       | diaphanous-related formin 3                                                      | ns                 | 2.8    | -4.4   |
|   |   |   | GAB1         | GRB2-associated binding protein 1                                                | ns                 | 4.4    | -3.2   |
|   |   |   | ANLN         | anillin actin binding protein                                                    | ns                 | 2.9    | -4.4   |
|   |   |   | LOC105377872 | uncharacterized LOC105377872                                                     | ns                 | 3.0    | -4.3   |
|   |   |   | ST8SIA6-AS1  | ST8SIA6 antisense RNA 1                                                          | ns                 | 4.3    | -2.9   |
|   |   |   | TYMS         | thymidylate synthetase                                                           | ns                 | 4.3    | -2.2   |
|   |   |   | CLIP1        | CAP-GLY domain containing linker protein 1                                       | ns                 | 4.3    | -2.1   |
|   |   |   | MBNL3        | muscleblind-like splicing regulator 3                                            | ns                 | 4.2    | -3.0   |
|   |   |   | TMEM40       | transmembrane protein 40                                                         | ns                 | 4.2    | -2.8   |
|   |   |   | LOC105378019 | uncharacterized LOC105378019                                                     | ns                 | 4.2    | -2.6   |
|   |   |   | ZNF292       | zinc finger protein 292                                                          | ns                 | 4.2    | -2.9   |
|   |   |   | ZFAT-AS1     | ZFAT antisense RNA 1                                                             | ns                 | 4.2    | -2.3   |
|   |   |   | HS3ST3B1     | heparan sulfate (glucosamine) 3-O-sulfotransferase 3B1                           | ns                 | 4.1    | -2.3   |
|   |   |   | NEDD4L       | neural precursor cell expressed, developmentally down-regulated 4-like           | ns                 | 4.1    | -2.5   |
|   |   |   | TNS4         | tensin 4                                                                         | ns                 | 3.4    | -4.1   |
|   |   |   | FXYD3        | FXYD domain containing ion transport regulator 3                                 | ns                 | 4.0    | -2.3   |
|   |   |   | MEST         | mesoderm specific transcript                                                     | ns                 | 4.0    | -2.4   |
|   |   |   | LOC105376910 | uncharacterized LOC105376910                                                     | ns                 | 4.0    | -3.2   |
|   |   |   | MET          | MET proto-oncogene, receptor tyrosine kinase                                     | ns                 | 3.6    | -4.0   |
|   |   |   | GRAMD2A      | GRAM domain containing 2A                                                        | ns                 | 4.0    | -3.0   |
|   |   |   | MB21D2       | Mab-21 domain containing 2                                                       | ns                 | 4.0    | -2.2   |
|   |   |   | SLC38A9      | solute carrier family 38, member 9                                               | ns                 | 3.4    | -4.0   |
|   |   |   | LOC105379521 | uncharacterized LOC105379521                                                     | ns                 | 4.0    | -3.8   |
|   |   |   | LINC01194    | long intergenic non-protein coding RNA 1194                                      | ns                 | 2.2    | -3.9   |
|   |   |   | ITGB4        | integrin beta 4                                                                  | ns                 | 3.2    | -3.9   |
|   |   |   | TENM3        | teneurin transmembrane protein 3                                                 | ns                 | 3.9    | -3.7   |
|   |   |   | CCNA2        | cyclin A2                                                                        | ns                 | 3.9    | -3.0   |
|   |   |   | CDK2         | cyclin-dependent kinase 2                                                        | ns                 | 3.8    | -3.6   |
|   |   |   | STK26        | serine                                                                           | ns                 | 3.8    | -2.3   |
|   |   |   | SLC38A1      | solute carrier family 38, member 1                                               | ns                 | 3.8    | -2.6   |
|   |   |   | SLC2A1       | solute carrier family 2 (facilitated glucose transporter), member 1              | ns                 | 3.7    | -3.8   |
|   |   |   | CCSAP        | centriole, cilia and spindle-associated protein                                  | ns                 | 2.8    | -3.8   |
|   |   |   | CYP11A1      | cytochrome P450, family 11, subfamily A, polypeptide 1                           | ns                 | 3.7    | -3.1   |
|   |   |   | WEE1         | WEE1 G2 checkpoint kinase                                                        | ns                 | 2.1    | -3.7   |
|   |   |   | ZNF750       | zinc finger protein 750                                                          | ns                 | 3.7    | -2.3   |
|   |   |   | DPP4         | dipeptidyl-peptidase 4                                                           | ns                 | 3.1    | -3.7   |
|   |   |   | SLC5A6       | solute carrier family 5 (sodium                                                  | ns                 | 3.7    | -2.8   |
|   |   |   | FERMT1       | fermitin family member 1                                                         | ns                 | 3.4    | -3.7   |
|   |   |   | CLN3         | ceroid-lipofuscinosis, neuronal 3                                                | ns                 | 2.8    | -3.7   |
|   |   |   | PCOLCE2      | procollagen C-endopeptidase enhancer 2                                           | ns                 | 3.6    | -2.9   |
|   |   |   | NCOA3        | nuclear receptor coactivator 3                                                   | ns                 | 3.6    | -2.2   |
|   |   |   | LOC105377943 | uncharacterized LOC105377943                                                     | ns                 | 3.6    | -3.0   |

| S | C | E | Symbol       | Name                                                                      | Linear Fold Change |        |        |
|---|---|---|--------------|---------------------------------------------------------------------------|--------------------|--------|--------|
|   |   |   |              |                                                                           | S vs C             | S vs E | E vs C |
|   |   |   | FIGN         | fidgetin                                                                  | ns                 | 3.6    | -2.7   |
|   |   |   | EBLN2        | endogenous Bornavirus-like nucleoprotein 2                                | ns                 | 3.6    | -2.5   |
|   |   |   | TBX20        | T-box 20                                                                  | ns                 | 3.6    | -2.5   |
|   |   |   | PGAP1        | post-GPI attachment to proteins 1                                         | ns                 | 3.6    | -2.8   |
|   |   |   | PHLPP1       | PH domain and leucine rich repeat protein phosphatase 1                   | ns                 | 3.6    | -2.3   |
|   |   |   | GDA          | guanine deaminase                                                         | ns                 | 3.6    | -3.6   |
|   |   |   | SLC29A1      | solute carrier family 29 (equilibrative nucleoside transporter), member 1 | ns                 | 2.3    | -3.6   |
|   |   |   | PARD6B       | par-6 family cell polarity regulator beta                                 | ns                 | 3.5    | -3.0   |
|   |   |   | RFC3         | replication factor C subunit 3                                            | ns                 | 3.0    | -3.5   |
|   |   |   | FAM156B      | family with sequence similarity 156, member B                             | ns                 | 3.4    | -2.6   |
|   |   |   | TFAP2A-AS1   | TFAP2A antisense RNA 1                                                    | ns                 | 3.4    | -3.2   |
|   |   |   | SMAD4        | SMAD family member 4                                                      | ns                 | 3.4    | -2.1   |
|   |   |   | ADAM12       | ADAM metalloproteinase domain 12                                          | ns                 | 3.4    | -2.4   |
|   |   |   | KNL1         | kinetochore scaffold 1                                                    | ns                 | 3.2    | -3.4   |
|   |   |   | EXO1         | exonuclease 1                                                             | ns                 | 2.4    | -3.4   |
|   |   |   | IRF6         | interferon regulatory factor 6                                            | ns                 | 3.4    | -2.5   |
|   |   |   | CGA          | glycoprotein hormones, alpha polypeptide                                  | ns                 | 3.4    | -3.0   |
|   |   |   | TEX10        | testis expressed 10                                                       | ns                 | 3.4    | -2.0   |
|   |   |   | RASA1        | RAS p21 protein activator (GTPase activating protein) 1                   | ns                 | 3.4    | -2.5   |
|   |   |   | SNORD16      | small nucleolar RNA, C                                                    | ns                 | 2.2    | -3.3   |
|   |   |   | CCDC162P     | coiled-coil domain containing 162, pseudogene                             | ns                 | 3.3    | -2.5   |
|   |   |   | PIP5K1B      | phosphatidylinositol-4-phosphate 5-kinase, type I, beta                   | ns                 | 3.3    | -2.0   |
|   |   |   | TICRR        | TOPBP1-interacting checkpoint and replication regulator                   | ns                 | 2.9    | -3.3   |
|   |   |   | ST7-OT4      | ST7 overlapping transcript 4                                              | ns                 | 3.3    | -2.1   |
|   |   |   | LOC105376501 | uncharacterized LOC105376501                                              | ns                 | 3.2    | -2.6   |
|   |   |   | SLC52A1      | solute carrier family 52 (riboflavin transporter), member 1               | ns                 | 2.9    | -3.2   |
|   |   |   | IGF2BP3      | insulin-like growth factor 2 mRNA binding protein 3                       | ns                 | 3.2    | -2.5   |
|   |   |   | MAN1A2       | mannosidase, alpha, class 1A, member 2                                    | ns                 | 3.2    | -2.2   |
|   |   |   | ATAD5        | ATPase family, AAA domain containing 5                                    | ns                 | 2.6    | -3.2   |
|   |   |   | SGO1         | shugoshin 1                                                               | ns                 | 3.2    | -2.8   |
|   |   |   | LOC105374160 | uncharacterized LOC105374160                                              | ns                 | 2.2    | -3.2   |
|   |   |   | MYH10        | myosin, heavy chain 10, non-muscle                                        | ns                 | 3.2    | -2.5   |
|   |   |   | COBLL1       | cordon-bleu WH2 repeat protein like 1                                     | ns                 | 3.1    | -2.7   |
|   |   |   | LRRC1        | leucine rich repeat containing 1                                          | ns                 | 2.6    | -3.1   |
|   |   |   | RGPD2        | RANBP2-like and GRIP domain containing 2                                  | ns                 | 3.1    | -2.1   |
|   |   |   | CEP295NL     | CEP295 N-terminal like                                                    | ns                 | 3.1    | -2.9   |
|   |   |   | STC1         | stanniocalcin 1                                                           | ns                 | 2.4    | -3.1   |
|   |   |   | ATP7B        | ATPase, Cu <sup>++</sup> transporting, beta polypeptide                   | ns                 | 3.1    | -2.0   |
|   |   |   | TDRP         | testis development related protein                                        | ns                 | 3.0    | -3.0   |
|   |   |   | UBE2T        | ubiquitin conjugating enzyme E2T                                          | ns                 | 3.0    | -2.5   |
|   |   |   | EML4         | echinoderm microtubule associated protein like 4                          | ns                 | 3.0    | -2.1   |
|   |   |   | CDC6         | cell division cycle 6                                                     | ns                 | 3.0    | -2.8   |
|   |   |   | RDH13        | retinol dehydrogenase 13 (all-trans                                       | ns                 | 3.0    | -3.0   |
|   |   |   | NET1         | neuroepithelial cell transforming 1                                       | ns                 | 2.4    | -3.0   |
|   |   |   | P2RY6        | pyrimidinergic receptor P2Y, G-protein coupled, 6                         | ns                 | 3.0    | -2.3   |
|   |   |   | LINC00540    | long intergenic non-protein coding RNA 540                                | ns                 | 3.0    | -2.0   |
|   |   |   | TPX2         | TPX2, microtubule-associated                                              | ns                 | 3.0    | -2.5   |
|   |   |   | SKP2         | S-phase kinase-associated protein 2, E3 ubiquitin protein ligase          | ns                 | 2.4    | -3.0   |
|   |   |   | CHML         | choroideremia-like (Rab escort protein 2)                                 | ns                 | 2.1    | -3.0   |
|   |   |   | GRHL1        | grainyhead-like transcription factor 1                                    | ns                 | 2.1    | -3.0   |
|   |   |   | S1PR2        | sphingosine-1-phosphate receptor 2                                        | ns                 | 2.5    | -2.9   |
|   |   |   | CCDC169      | coiled-coil domain containing 169                                         | ns                 | 2.3    | -2.9   |
|   |   |   | STEAP4       | STEAP family member 4                                                     | ns                 | 2.9    | -2.7   |
|   |   |   | WDR76        | WD repeat domain 76                                                       | ns                 | 2.9    | -2.4   |
|   |   |   | RFESD        | Rieske (Fe-S) domain containing                                           | ns                 | 2.9    | -2.4   |

| S | C | E | Symbol        | Name                                                                          | Linear Fold Change |        |        |
|---|---|---|---------------|-------------------------------------------------------------------------------|--------------------|--------|--------|
|   |   |   |               |                                                                               | S vs C             | S vs E | E vs C |
|   |   |   | VGLL1         | vestigial-like family member 1                                                | ns                 | 2.9    | -2.6   |
|   |   |   | PROSER1       | proline and serine rich 1                                                     | ns                 | 2.9    | -2.1   |
|   |   |   | ITIH5         | inter-alpha-trypsin inhibitor heavy chain family, member 5                    | ns                 | 2.9    | -2.5   |
|   |   |   | LOC101927853  | uncharacterized LOC101927853                                                  | ns                 | 2.9    | -2.8   |
|   |   |   | TENT5A        | terminal nucleotidyltransferase 5A                                            | ns                 | 2.9    | -2.4   |
|   |   |   | MFSD4B        | major facilitator superfamily domain containing 4B                            | ns                 | 2.9    | -2.5   |
|   |   |   | LOC105377770  | uncharacterized LOC105377770                                                  | ns                 | 2.9    | -2.8   |
|   |   |   | LOC101926943  | uncharacterized LOC101926943                                                  | ns                 | 2.4    | -2.9   |
|   |   |   | GRHL2         | grainyhead-like transcription factor 2                                        | ns                 | 2.8    | -2.7   |
|   |   |   | NUSAP1        | nucleolar and spindle associated protein 1                                    | ns                 | 2.7    | -2.8   |
|   |   |   | CENPF         | centromere protein F                                                          | ns                 | 2.8    | -2.8   |
|   |   |   | NECTIN4       | nectin cell adhesion molecule 4                                               | ns                 | 2.0    | -2.8   |
|   |   |   | DOCK9         | dedicator of cytokinesis 9                                                    | ns                 | 2.8    | -2.6   |
|   |   |   | TMC1          | transmembrane channel like 1                                                  | ns                 | 2.5    | -2.8   |
|   |   |   | PRC1          | protein regulator of cytokinesis 1                                            | ns                 | 2.7    | -2.4   |
|   |   |   | SKA3          | spindle and kinetochore associated complex subunit 3                          | ns                 | 2.0    | -2.7   |
|   |   |   | TFAP2A        | transcription factor AP-2 alpha (activating enhancer binding protein 2 alpha) | ns                 | 2.4    | -2.7   |
|   |   |   | LOC105379715  | uncharacterized LOC105379715                                                  | ns                 | 2.6    | -2.7   |
|   |   |   | KIF2A         | kinesin heavy chain member 2A                                                 | ns                 | 2.7    | -2.0   |
|   |   |   | GTF2I         | general transcription factor Iii                                              | ns                 | 2.7    | -2.6   |
|   |   |   | MCM5          | minichromosome maintenance complex component 5                                | ns                 | 2.3    | -2.6   |
|   |   |   | CENPI         | centromere protein I                                                          | ns                 | 2.6    | -2.6   |
|   |   |   | FMR1          | fragile X mental retardation 1                                                | ns                 | 2.1    | -2.6   |
|   |   |   | EZH2          | enhancer of zeste 2 polycomb repressive complex 2 subunit                     | ns                 | 2.6    | -2.6   |
|   |   |   | EZR           | ezrin                                                                         | ns                 | 2.5    | -2.6   |
|   |   |   | GPSM2         | G-protein signaling modulator 2                                               | ns                 | 2.3    | -2.6   |
|   |   |   | AHSA2P        | activator of HSP90 ATPase homolog 2, pseudogene                               | ns                 | 2.6    | -2.1   |
|   |   |   | LIMK2         | LIM domain kinase 2                                                           | ns                 | 2.6    | -2.1   |
|   |   |   | LOC105370921  | uncharacterized LOC105370921                                                  | ns                 | 2.5    | -2.6   |
|   |   |   | IMMP2L        | inner mitochondrial membrane peptidase subunit 2                              | ns                 | 2.6    | -2.4   |
|   |   |   | GLCCI1        | glucocorticoid induced 1                                                      | ns                 | 2.6    | -2.1   |
|   |   |   | UBE2C         | ubiquitin-conjugating enzyme E2C                                              | ns                 | 2.5    | -2.5   |
|   |   |   | RTTN          | rotatin                                                                       | ns                 | 2.5    | -2.1   |
|   |   |   | MCTS2P        | malignant T-cell amplified sequence 2, pseudogene                             | ns                 | 2.1    | -2.5   |
|   |   |   | ATF3          | activating transcription factor 3                                             | ns                 | 2.5    | -2.2   |
|   |   |   | MAST4         | microtubule associated serine                                                 | ns                 | 2.5    | -2.2   |
|   |   |   | DNMT1         | DNA (cytosine-5-)-methyltransferase 1                                         | ns                 | 2.5    | -2.2   |
|   |   |   | MBTD1         | mbt domain containing 1                                                       | ns                 | 2.5    | -2.3   |
|   |   |   | SGO1-AS1      | SGO1 antisense RNA 1                                                          | ns                 | 2.0    | -2.4   |
|   |   |   | POLA1         | polymerase (DNA directed), alpha 1, catalytic subunit                         | ns                 | 2.4    | -2.1   |
|   |   |   | DCP2          | decapping mRNA 2                                                              | ns                 | 2.4    | -2.4   |
|   |   |   | DKFZP586I1420 | uncharacterized protein DKFZp586I1420                                         | ns                 | 2.2    | -2.4   |
|   |   |   | ANGPTL4       | angiopoietin like 4                                                           | ns                 | 2.2    | -2.3   |
|   |   |   | LGALS8        | lectin, galactoside-binding, soluble, 8                                       | ns                 | 2.3    | -2.2   |
|   |   |   | PPP1R15B      | protein phosphatase 1, regulatory subunit 15B                                 | ns                 | 2.1    | -2.3   |
|   |   |   | SCARNA9       | small Cajal body-specific RNA 9                                               | ns                 | 2.2    | -2.2   |
|   |   |   | ERVMER34-1    | endogenous retrovirus group MER34, member 1                                   | ns                 | 2.0    | -2.2   |
|   |   |   | DACT2         | dishevelled-binding antagonist of beta-catenin 2                              | ns                 | 2.0    | -2.2   |
|   |   |   | CDCA2         | cell division cycle associated 2                                              | ns                 | 2.2    | -2.0   |
|   |   |   | SLC29A2       | solute carrier family 29 (equilibrative nucleoside transporter), member 2     | ns                 | 2.0    | -2.2   |
|   |   |   | ADK           | adenosine kinase                                                              | ns                 | 2.0    | -2.2   |
|   |   |   | TBC1D3E       | TBC1 domain family, member 3E                                                 | ns                 | 2.0    | -2.2   |
|   |   |   | CYRIA         | CYFIP related Rac1 interactor A                                               | ns                 | 2.1    | -2.1   |
|   |   |   | TMEM30B       | transmembrane protein 30B                                                     | ns                 | 2.0    | -2.1   |
|   |   |   | FAM117B       | family with sequence similarity 117, member B                                 | ns                 | 2.0    | -2.1   |

| S | C | E | Symbol     | Name                                                                                                | Linear Fold Change |        |        |
|---|---|---|------------|-----------------------------------------------------------------------------------------------------|--------------------|--------|--------|
|   |   |   |            |                                                                                                     | S vs C             | S vs E | E vs C |
|   |   |   | ZNF808     | zinc finger protein 808                                                                             | ns                 | 2.1    | -2.1   |
|   |   |   | SPC25      | SPC25, NDC80 kinetochore complex component                                                          | ns                 | 2.0    | -2.1   |
|   |   |   | KIF23      | kinesin family member 23                                                                            | ns                 | 2.0    | -2.0   |
|   |   |   | MMP12      | matrix metalloproteinase 12                                                                         | -75.0              | -173.6 | ns     |
|   |   |   | IGFBP1     | insulin like growth factor binding protein 1                                                        | -53.3              | -151.0 | ns     |
|   |   |   | EPYC       | epiphycan                                                                                           | -11.1              | -74.0  | ns     |
|   |   |   | PRG2       | proteoglycan 2, bone marrow (natural killer cell activator, eosinophil granule major basic protein) | -66.5              | -73.7  | ns     |
|   |   |   | MT1H       | metallothionein 1H                                                                                  | -67.7              | -30.5  | ns     |
|   |   |   | LAIR2      | leukocyte-associated immunoglobulin-like receptor 2                                                 | -45.2              | -31.5  | ns     |
|   |   |   | NOTUM      | notum pectinacetyltransferase homolog (Drosophila)                                                  | -44.8              | -31.3  | ns     |
|   |   |   | MT1G       | metallothionein 1G                                                                                  | -26.2              | -32.8  | ns     |
|   |   |   | HNRNPA1P33 | heterogeneous nuclear ribonucleoprotein A1 pseudogene 33                                            | -32.1              | -10.2  | ns     |
|   |   |   | HTRA4      | HtrA serine peptidase 4                                                                             | -30.0              | -28.7  | ns     |
|   |   |   | HCAR2      | hydroxycarboxylic acid receptor 2                                                                   | -29.7              | -12.5  | ns     |
|   |   |   | AOC1       | amine oxidase, copper containing 1                                                                  | -16.6              | -22.5  | ns     |
|   |   |   | LINC01602  | long intergenic non-protein coding RNA 1602                                                         | -9.7               | -22.4  | ns     |
|   |   |   | MT1X       | metallothionein 1X                                                                                  | -18.9              | -21.9  | ns     |
|   |   |   | MAMDC2     | MAM domain containing 2                                                                             | -9.4               | -21.0  | ns     |
|   |   |   | DIO2       | deiodinase, iodothyronine, type II                                                                  | -20.9              | -6.7   | ns     |
|   |   |   | PDCD1LG2   | programmed cell death 1 ligand 2                                                                    | -16.0              | -20.7  | ns     |
|   |   |   | IL1R2      | interleukin 1 receptor, type II                                                                     | -14.1              | -17.6  | ns     |
|   |   |   | MT1F       | metallothionein 1F                                                                                  | -17.2              | -14.0  | ns     |
|   |   |   | RASGRF2    | Ras protein-specific guanine nucleotide-releasing factor 2                                          | -17.1              | -8.7   | ns     |
|   |   |   | PLA2G10    | phospholipase A2, group X                                                                           | -16.4              | -15.2  | ns     |
|   |   |   | ISG15      | ISG15 ubiquitin-like modifier                                                                       | -11.9              | -14.0  | ns     |
|   |   |   | TNFSF10    | tumor necrosis factor (ligand) superfamily, member 10                                               | -12.8              | -7.7   | ns     |
|   |   |   | HAPLN3     | hyaluronan and proteoglycan link protein 3                                                          | -12.6              | -4.3   | ns     |
|   |   |   | PLAC8      | placenta specific 8                                                                                 | -12.5              | -7.1   | ns     |
|   |   |   | HSPG2      | heparan sulfate proteoglycan 2                                                                      | -12.3              | -11.0  | ns     |
|   |   |   | DEPDC7     | DEP domain containing 7                                                                             | -12.3              | -7.1   | ns     |
|   |   |   | GLIPR1     | GLI pathogenesis-related 1                                                                          | -11.7              | -9.4   | ns     |
|   |   |   | SLC16A6    | solute carrier family 16, member 6                                                                  | -11.4              | -5.7   | ns     |
|   |   |   | RFPL4B     | ret finger protein-like 4B                                                                          | -8.5               | -11.2  | ns     |
|   |   |   | DAPP1      | dual adaptor of phosphotyrosine and 3-phosphoinositides                                             | -8.7               | -11.0  | ns     |
|   |   |   | MMP2       | matrix metalloproteinase 2                                                                          | -7.7               | -10.8  | ns     |
|   |   |   | PLA2G7     | phospholipase A2, group VII (platelet-activating factor acetylhydrolase, plasma)                    | -5.2               | -10.4  | ns     |
|   |   |   | GPR32      | G protein-coupled receptor 32                                                                       | -10.1              | -7.8   | ns     |
|   |   |   | FAT2       | FAT atypical cadherin 2                                                                             | -9.8               | -8.1   | ns     |
|   |   |   | NOG        | noggin                                                                                              | -9.7               | -6.9   | ns     |
|   |   |   | CST6       | cystatin E                                                                                          | -9.6               | -4.4   | ns     |
|   |   |   | SLC4A7     | solute carrier family 4, sodium bicarbonate cotransporter, member 7                                 | -9.4               | -6.9   | ns     |
|   |   |   | TCF7L2     | transcription factor 7-like 2 (T-cell specific, HMG-box)                                            | -9.3               | -6.0   | ns     |
|   |   |   | SDC4       | syndecan 4                                                                                          | -9.2               | -3.9   | ns     |
|   |   |   | PTGES      | prostaglandin E synthase                                                                            | -9.1               | -4.8   | ns     |
|   |   |   | CCR1       | chemokine (C-C motif) receptor 1                                                                    | -8.8               | -6.2   | ns     |
|   |   |   | MYCNUT     | MYCN upstream transcript (non-protein coding)                                                       | -8.7               | -5.2   | ns     |
|   |   |   | JPT1       | Jupiter microtubule associated homolog 1                                                            | -8.6               | -7.4   | ns     |
|   |   |   | QSOX1      | quiescin Q6 sulfhydryl oxidase 1                                                                    | -8.5               | -7.6   | ns     |
|   |   |   | REPS2      | RALBP1 associated Eps domain containing 2                                                           | -8.5               | -6.3   | ns     |
|   |   |   | SERPING1   | serpin peptidase inhibitor, clade G (C1 inhibitor), member 1                                        | -4.9               | -8.3   | ns     |
|   |   |   | FLNB       | filamin B, beta                                                                                     | -8.3               | -4.5   | ns     |
|   |   |   | UPK1B      | uroplakin 1B                                                                                        | -8.3               | -5.2   | ns     |
|   |   |   | IL2RB      | interleukin 2 receptor, beta                                                                        | -7.3               | -8.2   | ns     |
|   |   |   | GREB1L     | growth regulation by estrogen in breast cancer-like                                                 | -7.7               | -4.0   | ns     |
|   |   |   | ADAM19     | ADAM metalloproteinase domain 19                                                                    | -7.6               | -6.2   | ns     |



| S | C | E | Symbol     | Name                                                                      | Linear Fold Change |        |        |
|---|---|---|------------|---------------------------------------------------------------------------|--------------------|--------|--------|
|   |   |   |            |                                                                           | S vs C             | S vs E | E vs C |
|   |   |   | PLAUR      | plasminogen activator, urokinase receptor                                 | -3.4               | -7.5   | ns     |
|   |   |   | CRISPLD2   | cysteine-rich secretory protein LCCL domain containing 2                  | -3.3               | -7.5   | ns     |
|   |   |   | SAMD9      | sterile alpha motif domain containing 9                                   | -5.2               | -7.4   | ns     |
|   |   |   | SPRR2G     | small proline-rich protein 2G                                             | -6.6               | -7.3   | ns     |
|   |   |   | GALNT3     | polypeptide N-acetylgalactosaminyltransferase 3                           | -7.3               | -6.1   | ns     |
|   |   |   | IL10RA     | interleukin 10 receptor, alpha                                            | -7.2               | -3.6   | ns     |
|   |   |   | SNAI1      | snail family zinc finger 1                                                | -7.1               | -4.9   | ns     |
|   |   |   | CCNE1      | cyclin E1                                                                 | -7.0               | -3.4   | ns     |
|   |   |   | IFI27      | interferon, alpha-inducible protein 27                                    | -3.5               | -7.0   | ns     |
|   |   |   | CITED2     | Cbp                                                                       | -5.3               | -7.0   | ns     |
|   |   |   | FN1        | fibronectin 1                                                             | -6.9               | -5.5   | ns     |
|   |   |   | TGFB2      | transforming growth factor beta 2                                         | -6.8               | -6.3   | ns     |
|   |   |   | C12orf75   | chromosome 12 open reading frame 75                                       | -6.8               | -5.4   | ns     |
|   |   |   | HUNK       | hormonally up-regulated Neu-associated kinase                             | -4.0               | -6.8   | ns     |
|   |   |   | CLNK       | cytokine-dependent hematopoietic cell linker                              | -6.7               | -4.7   | ns     |
|   |   |   | IFIT1      | interferon-induced protein with tetratricopeptide repeats 1               | -5.5               | -6.7   | ns     |
|   |   |   | TAP1       | transporter 1, ATP-binding cassette, sub-family B (MDR                    | -5.9               | -6.6   | ns     |
|   |   |   | GALNT7     | polypeptide N-acetylgalactosaminyltransferase 7                           | -6.6               | -5.7   | ns     |
|   |   |   | RAB6C-AS1  | RAB6C antisense RNA 1                                                     | -6.6               | -3.7   | ns     |
|   |   |   | HTRA1      | HtrA serine peptidase 1                                                   | -6.5               | -4.4   | ns     |
|   |   |   | TPM1       | tropomyosin 1 (alpha)                                                     | -6.5               | -3.7   | ns     |
|   |   |   | HLA-G      | major histocompatibility complex, class I, G                              | -5.3               | -6.5   | ns     |
|   |   |   | MXRA8      | matrix-remodelling associated 8                                           | -4.7               | -6.4   | ns     |
|   |   |   | MIR181A2HG | MIR181A2 host gene                                                        | -6.4               | -2.7   | ns     |
|   |   |   | GPRC5A     | G protein-coupled receptor, class C, group 5, member A                    | -6.4               | -6.2   | ns     |
|   |   |   | TIMP3      | TIMP metalloproteinase inhibitor 3                                        | -4.4               | -6.2   | ns     |
|   |   |   | MX1        | MX dynamin-like GTPase 1                                                  | -5.1               | -6.2   | ns     |
|   |   |   | CHRM5      | cholinergic receptor, muscarinic 5                                        | -6.2               | -3.6   | ns     |
|   |   |   | UBE2L6     | ubiquitin-conjugating enzyme E2L 6                                        | -2.8               | -5.9   | ns     |
|   |   |   | KDEL3      | KDEL (Lys-Asp-Glu-Leu) endoplasmic reticulum protein retention receptor 3 | -5.4               | -5.8   | ns     |
|   |   |   | ISM2       | isthmin 2                                                                 | -5.8               | -4.9   | ns     |
|   |   |   | LGALS3BP   | lectin, galactoside-binding, soluble, 3 binding protein                   | -5.7               | -4.3   | ns     |
|   |   |   | EPSTI1     | epithelial stromal interaction 1 (breast)                                 | -5.7               | -4.8   | ns     |
|   |   |   | LAMA4      | laminin, alpha 4                                                          | -3.7               | -5.7   | ns     |
|   |   |   | IFITM1     | interferon induced transmembrane protein 1                                | -2.8               | -5.6   | ns     |
|   |   |   | LVRN       | laeverin                                                                  | -5.5               | -4.5   | ns     |
|   |   |   | UBL3       | ubiquitin-like 3                                                          | -5.4               | -3.3   | ns     |
|   |   |   | PTPRF      | protein tyrosine phosphatase, receptor type, F                            | -5.4               | -3.7   | ns     |
|   |   |   | ARHGDI3    | Rho GDP dissociation inhibitor (GDI) beta                                 | -5.3               | -4.8   | ns     |
|   |   |   | HCG4       | HLA complex group 4 (non-protein coding)                                  | -4.5               | -5.2   | ns     |
|   |   |   | SH3PXD2B   | SH3 and PX domains 2B                                                     | -5.2               | -4.1   | ns     |
|   |   |   | SOX4       | SRY box 4                                                                 | -5.2               | -3.3   | ns     |
|   |   |   | ART4       | ADP-ribosyltransferase 4 (Dombrock blood group)                           | -5.2               | -3.5   | ns     |
|   |   |   | UGDH       | UDP-glucose 6-dehydrogenase                                               | -3.6               | -5.2   | ns     |
|   |   |   | PIPOX      | pipecolic acid oxidase                                                    | -3.3               | -5.1   | ns     |
|   |   |   | SOAT1      | sterol O-acyltransferase 1                                                | -3.9               | -5.1   | ns     |
|   |   |   | GALNT6     | polypeptide N-acetylgalactosaminyltransferase 6                           | -5.0               | -3.7   | ns     |
|   |   |   | COL12A1    | collagen, type XII, alpha 1                                               | -4.2               | -5.0   | ns     |
|   |   |   | NPC2       | Niemann-Pick disease, type C2                                             | -2.8               | -5.0   | ns     |
|   |   |   | SCUBE1     | signal peptide, CUB domain, EGF-like 1                                    | -5.0               | -3.2   | ns     |
|   |   |   | NRIP1      | nuclear receptor interacting protein 1                                    | -4.9               | -2.8   | ns     |
|   |   |   | GPR78      | G protein-coupled receptor 78                                             | -4.9               | -3.1   | ns     |
|   |   |   | IFIH1      | interferon induced, with helicase C domain 1                              | -4.9               | -3.9   | ns     |
|   |   |   | TIMP1      | TIMP metalloproteinase inhibitor 1                                        | -2.9               | -4.9   | ns     |
|   |   |   | RAB8B      | RAB8B, member RAS oncogene family                                         | -4.8               | -3.7   | ns     |

| S | C | E | Symbol       | Name                                                                                                          | Linear Fold Change |        |        |
|---|---|---|--------------|---------------------------------------------------------------------------------------------------------------|--------------------|--------|--------|
|   |   |   |              |                                                                                                               | S vs C             | S vs E | E vs C |
|   |   |   | CD276        | CD276 molecule                                                                                                | -4.7               | -3.4   | ns     |
|   |   |   | GRK3         | G protein-coupled receptor kinase 3                                                                           | -4.7               | -3.8   | ns     |
|   |   |   | PARP9        | poly(ADP-ribose) polymerase family member 9                                                                   | -3.5               | -4.6   | ns     |
|   |   |   | LRRC32       | leucine rich repeat containing 32                                                                             | -4.6               | -2.5   | ns     |
|   |   |   | MGAT4A       | mannosyl (alpha-1,3-)-glycoprotein beta-1,4-N-acetylglucosaminyltransferase, isozyme A                        | -4.6               | -4.5   | ns     |
|   |   |   | LTBP1        | latent transforming growth factor beta binding protein 1                                                      | -2.9               | -4.6   | ns     |
|   |   |   | P4HA1        | prolyl 4-hydroxylase, alpha polypeptide I                                                                     | -4.5               | -2.5   | ns     |
|   |   |   | LOC105379311 | uncharacterized LOC105379311                                                                                  | -4.5               | -3.0   | ns     |
|   |   |   | GBP2         | guanylate binding protein 2, interferon-inducible                                                             | -4.0               | -4.5   | ns     |
|   |   |   | GAL          | galanin                                                                                                       | -2.3               | -4.5   | ns     |
|   |   |   | LAYN         | layilin                                                                                                       | -3.0               | -4.5   | ns     |
|   |   |   | CPED1        | cadherin-like and PC-esterase domain containing 1                                                             | -3.2               | -4.4   | ns     |
|   |   |   | LOC105377105 | uncharacterized LOC105377105                                                                                  | -4.4               | -2.5   | ns     |
|   |   |   | HLA-E        | major histocompatibility complex, class I, E                                                                  | -2.6               | -4.4   | ns     |
|   |   |   | ITGA5        | integrin alpha 5                                                                                              | -4.4               | -2.4   | ns     |
|   |   |   | GCNT1        | glucosaminyl (N-acetyl) transferase 1, core 2                                                                 | -2.9               | -4.4   | ns     |
|   |   |   | GDPD3        | glycerophosphodiester phosphodiesterase domain containing 3                                                   | -4.4               | -2.6   | ns     |
|   |   |   | CYP26A1      | cytochrome P450, family 26, subfamily A, polypeptide 1                                                        | -3.3               | -4.4   | ns     |
|   |   |   | FHOD3        | formin homology 2 domain containing 3                                                                         | -4.3               | -4.4   | ns     |
|   |   |   | OAS1         | 2-5-oligoadenylate synthetase 1                                                                               | -4.1               | -4.4   | ns     |
|   |   |   | PXN          | paxillin                                                                                                      | -4.3               | -2.2   | ns     |
|   |   |   | DNAPTP3      | histone demethylase UTY-like                                                                                  | -4.3               | -3.7   | ns     |
|   |   |   | MTSS2        | MTSS I-BAR domain containing 2                                                                                | -4.3               | -2.4   | ns     |
|   |   |   | SLC25A15     | solute carrier family 25 (mitochondrial carrier; ornithine transporter) member 15                             | -4.2               | -3.4   | ns     |
|   |   |   | IGFBP3       | insulin like growth factor binding protein 3                                                                  | -4.2               | -2.1   | ns     |
|   |   |   | ST6GALNAC2   | ST6 (alpha-N-acetyl-neuraminyl-2,3-beta-galactosyl-1,3)-N-acetylgalactosaminide alpha-2,6-sialyltransferase 2 | -3.8               | -4.2   | ns     |
|   |   |   | ACSL5        | acyl-CoA synthetase long-chain family member 5                                                                | -3.0               | -4.2   | ns     |
|   |   |   | KRT19        | keratin 19, type I                                                                                            | -4.2               | -2.4   | ns     |
|   |   |   | HLA-C        | major histocompatibility complex, class I, C                                                                  | -2.6               | -4.2   | ns     |
|   |   |   | ASAP3        | ArfGAP with SH3 domain, ankyrin repeat and PH domain 3                                                        | -4.2               | -3.2   | ns     |
|   |   |   | TSPO         | translocator protein (18kDa)                                                                                  | -2.9               | -4.2   | ns     |
|   |   |   | PEA15        | phosphoprotein enriched in astrocytes 15                                                                      | -2.2               | -4.1   | ns     |
|   |   |   | LPCAT1       | lysophosphatidylcholine acyltransferase 1                                                                     | -4.1               | -2.1   | ns     |
|   |   |   | FBXO32       | F-box protein 32                                                                                              | -3.1               | -4.1   | ns     |
|   |   |   | PCSK6        | proprotein convertase subtilisin                                                                              | -4.1               | -2.4   | ns     |
|   |   |   | ADAMTS1      | ADAM metalloproteinase with thrombospondin type 1 motif 1                                                     | -4.1               | -3.7   | ns     |
|   |   |   | LINC01296    | long intergenic non-protein coding RNA 1296                                                                   | -4.1               | -2.9   | ns     |
|   |   |   | HPGD         | hydroxyprostaglandin dehydrogenase 15-(NAD)                                                                   | -4.0               | -3.0   | ns     |
|   |   |   | SEMA3C       | semaphorin 3C                                                                                                 | -3.0               | -4.0   | ns     |
|   |   |   | PTGER3       | prostaglandin E receptor 3 (subtype EP3)                                                                      | -3.6               | -4.0   | ns     |
|   |   |   | AFAP1        | actin filament associated protein 1                                                                           | -4.0               | -2.4   | ns     |
|   |   |   | IL1R1        | interleukin 1 receptor, type I                                                                                | -2.5               | -3.9   | ns     |
|   |   |   | PLOD2        | procollagen-lysine, 2-oxoglutarate 5-dioxygenase 2                                                            | -3.9               | -2.4   | ns     |
|   |   |   | STAT1        | signal transducer and activator of transcription 1                                                            | -2.9               | -3.8   | ns     |
|   |   |   | APOL6        | apolipoprotein L, 6                                                                                           | -3.2               | -3.8   | ns     |
|   |   |   | KAT14        | lysine acetyltransferase 14                                                                                   | -3.8               | -2.2   | ns     |
|   |   |   | LY6K         | lymphocyte antigen 6 complex, locus K                                                                         | -3.7               | -2.5   | ns     |
|   |   |   | UGCG         | UDP-glucose ceramide glucosyltransferase                                                                      | -3.1               | -3.7   | ns     |
|   |   |   | DHRS7        | dehydrogenase                                                                                                 | -2.8               | -3.7   | ns     |
|   |   |   | CNN2         | calponin 2                                                                                                    | -3.3               | -3.7   | ns     |
|   |   |   | HCAR1        | hydroxycarboxylic acid receptor 1                                                                             | -3.7               | -2.4   | ns     |
|   |   |   | CSGALNACT2   | chondroitin sulfate N-acetylgalactosaminyltransferase 2                                                       | -2.5               | -3.7   | ns     |
|   |   |   | PARP4        | poly(ADP-ribose) polymerase family member 4                                                                   | -2.8               | -3.6   | ns     |
|   |   |   | PLSCR1       | phospholipid scramblase 1                                                                                     | -3.6               | -2.7   | ns     |
|   |   |   | MYADM        | myeloid-associated differentiation marker                                                                     | -3.6               | -2.4   | ns     |



| S | C | E | Symbol    | Name                                                                                          | Linear Fold Change |        |        |
|---|---|---|-----------|-----------------------------------------------------------------------------------------------|--------------------|--------|--------|
|   |   |   |           |                                                                                               | S vs C             | S vs E | E vs C |
|   |   |   | PTPRS     | protein tyrosine phosphatase, receptor type, S                                                | -3.0               | -3.5   | ns     |
|   |   |   | EXTL3     | exostosin-like glycosyltransferase 3                                                          | -3.5               | -2.2   | ns     |
|   |   |   | MACIR     | macrophage immunometabolism regulator                                                         | -3.5               | -2.8   | ns     |
|   |   |   | LIMA1     | LIM domain and actin binding 1                                                                | -3.5               | -3.1   | ns     |
|   |   |   | ETS2      | v-ets avian erythroblastosis virus E26 oncogene homolog 2                                     | -2.9               | -3.5   | ns     |
|   |   |   | PDIA5     | protein disulfide isomerase family A, member 5                                                | -3.5               | -2.6   | ns     |
|   |   |   | FHL2      | four and a half LIM domains 2                                                                 | -3.5               | -2.4   | ns     |
|   |   |   | HLA-F-AS1 | HLA-F antisense RNA 1                                                                         | -2.8               | -3.5   | ns     |
|   |   |   | MEX3D     | mex-3 RNA binding family member D                                                             | -3.5               | -2.9   | ns     |
|   |   |   | SLC2A10   | solute carrier family 2 (facilitated glucose transporter), member 10                          | -3.5               | -3.1   | ns     |
|   |   |   | GCH1      | GTP cyclohydrolase 1                                                                          | -3.4               | -3.4   | ns     |
|   |   |   | COTL1     | coactosin-like F-actin binding protein 1                                                      | -3.4               | -2.9   | ns     |
|   |   |   | CRACDL    | CRACD like                                                                                    | -3.4               | -2.1   | ns     |
|   |   |   | SLC15A3   | solute carrier family 15 (oligopeptide transporter), member 3                                 | -3.4               | -2.6   | ns     |
|   |   |   | PSMB8     | proteasome subunit beta 8                                                                     | -2.1               | -3.4   | ns     |
|   |   |   | TNFAIP2   | tumor necrosis factor, alpha-induced protein 2                                                | -3.4               | -3.1   | ns     |
|   |   |   | CMTM3     | CKLF-like MARVEL transmembrane domain containing 3                                            | -3.3               | -2.8   | ns     |
|   |   |   | RRAD      | Ras-related associated with diabetes                                                          | -3.3               | -2.9   | ns     |
|   |   |   | PLK2      | polo-like kinase 2                                                                            | -3.3               | -2.7   | ns     |
|   |   |   | MEGF9     | multiple EGF-like-domains 9                                                                   | -2.6               | -3.3   | ns     |
|   |   |   | SSR3      | signal sequence receptor, gamma (translocon-associated protein gamma)                         | -2.5               | -3.2   | ns     |
|   |   |   | ECE1      | endothelin converting enzyme 1                                                                | -2.9               | -3.2   | ns     |
|   |   |   | TUBB2A    | tubulin, beta 2A class IIa                                                                    | -3.2               | -3.2   | ns     |
|   |   |   | SH3D19    | SH3 domain containing 19                                                                      | -3.2               | -2.8   | ns     |
|   |   |   | ASCL2     | achaete-scute family bHLH transcription factor 2                                              | -3.2               | -2.7   | ns     |
|   |   |   | LACTB     | lactamase, beta                                                                               | -2.7               | -3.2   | ns     |
|   |   |   | CLN5      | ceroid-lipofuscinosis, neuronal 5                                                             | -3.2               | -2.8   | ns     |
|   |   |   | PLOD1     | procollagen-lysine, 2-oxoglutarate 5-dioxygenase 1                                            | -3.2               | -2.8   | ns     |
|   |   |   | WIPF1     | WAS                                                                                           | -2.2               | -3.2   | ns     |
|   |   |   | ERP27     | endoplasmic reticulum protein 27                                                              | -3.2               | -2.7   | ns     |
|   |   |   | IL13RA1   | interleukin 13 receptor, alpha 1                                                              | -2.4               | -3.2   | ns     |
|   |   |   | RPS27L    | ribosomal protein S27-like                                                                    | -3.2               | -2.2   | ns     |
|   |   |   | SERPINE2  | serpin peptidase inhibitor, clade E (nexin, plasminogen activator inhibitor type 1), member 2 | -3.1               | -3.0   | ns     |
|   |   |   | KCNK12    | potassium channel, two pore domain subfamily K, member 12                                     | -3.0               | -3.1   | ns     |
|   |   |   | KLF6      | Kruppel-like factor 6                                                                         | -3.0               | -3.1   | ns     |
|   |   |   | HEG1      | heart development protein with EGF-like domains 1                                             | -3.1               | -2.8   | ns     |
|   |   |   | FAM110A   | family with sequence similarity 110, member A                                                 | -3.0               | -2.6   | ns     |
|   |   |   | PLOD3     | procollagen-lysine, 2-oxoglutarate 5-dioxygenase 3                                            | -3.0               | -3.0   | ns     |
|   |   |   | MICAL2    | microtubule associated monooxygenase, calponin and LIM domain containing 2                    | -2.6               | -3.0   | ns     |
|   |   |   | SESTD1    | SEC14 and spectrin domains 1                                                                  | -3.0               | -2.2   | ns     |
|   |   |   | PARP12    | poly(ADP-ribose) polymerase family member 12                                                  | -2.8               | -3.0   | ns     |
|   |   |   | CCN1      | cellular communication network factor 1                                                       | -3.0               | -3.0   | ns     |
|   |   |   | OCIAD2    | OCIA domain containing 2                                                                      | -3.0               | -2.9   | ns     |
|   |   |   | RHOU      | ras homolog family member U                                                                   | -3.0               | -2.8   | ns     |
|   |   |   | PIGT      | phosphatidylinositol glycan anchor biosynthesis class T                                       | -2.5               | -3.0   | ns     |
|   |   |   | MMP14     | matrix metalloproteinase 14 (membrane-inserted)                                               | -3.0               | -2.9   | ns     |
|   |   |   | CD9       | CD9 molecule                                                                                  | -3.0               | -2.5   | ns     |
|   |   |   | SYNE1     | spectrin repeat containing, nuclear envelope 1                                                | -2.6               | -3.0   | ns     |
|   |   |   | EIF4EBP1  | eukaryotic translation initiation factor 4E binding protein 1                                 | -3.0               | -2.4   | ns     |
|   |   |   | PGRMC1    | progesterone receptor membrane component 1                                                    | -2.9               | -2.7   | ns     |
|   |   |   | JAK1      | Janus kinase 1                                                                                | -2.9               | -2.3   | ns     |
|   |   |   | GALM      | galactose mutarotase (aldose 1-epimerase)                                                     | -2.9               | -2.7   | ns     |
|   |   |   | STXBP5    | syntaxin binding protein 5 (tomosyn)                                                          | -2.9               | -2.1   | ns     |
|   |   |   | TRIM14    | tripartite motif containing 14                                                                | -2.9               | -2.4   | ns     |
|   |   |   | HACD4     | 3-hydroxyacyl-CoA dehydratase 4                                                               | -2.7               | -2.9   | ns     |

| S | C | E | Symbol       | Name                                                                             | Linear Fold Change |        |        |
|---|---|---|--------------|----------------------------------------------------------------------------------|--------------------|--------|--------|
|   |   |   |              |                                                                                  | S vs C             | S vs E | E vs C |
|   |   |   | LINC00324    | long intergenic non-protein coding RNA 324                                       | -2.3               | -2.9   | ns     |
|   |   |   | CEACAM1      | carcinoembryonic antigen-related cell adhesion molecule 1 (biliary glycoprotein) | -2.8               | -2.4   | ns     |
|   |   |   | EHBP1        | EH domain binding protein 1                                                      | -2.8               | -2.8   | ns     |
|   |   |   | TUBB6        | tubulin, beta 6 class V                                                          | -2.8               | -2.2   | ns     |
|   |   |   | C5orf46      | chromosome 5 open reading frame 46                                               | -2.8               | -2.3   | ns     |
|   |   |   | PRDX4        | peroxiredoxin 4                                                                  | -2.8               | -2.8   | ns     |
|   |   |   | RABAC1       | Rab acceptor 1 (prenylated)                                                      | -2.8               | -2.7   | ns     |
|   |   |   | EFNB1        | ephrin-B1                                                                        | -2.8               | -2.2   | ns     |
|   |   |   | TES          | testin LIM domain protein                                                        | -2.7               | -2.8   | ns     |
|   |   |   | CDC42SE2     | CDC42 small effector 2                                                           | -2.8               | -2.2   | ns     |
|   |   |   | ZC3HAV1      | zinc finger CCCH-type, antiviral 1                                               | -2.3               | -2.8   | ns     |
|   |   |   | GPR180       | G protein-coupled receptor 180                                                   | -2.7               | -2.6   | ns     |
|   |   |   | AIF1L        | allograft inflammatory factor 1-like                                             | -2.7               | -2.7   | ns     |
|   |   |   | VASP         | vasodilator-stimulated phosphoprotein                                            | -2.7               | -2.4   | ns     |
|   |   |   | RPL39L       | ribosomal protein L39-like                                                       | -2.5               | -2.7   | ns     |
|   |   |   | DTX3L        | deltex 3 like, E3 ubiquitin ligase                                               | -2.3               | -2.7   | ns     |
|   |   |   | DENND1B      | DENN                                                                             | -2.7               | -2.0   | ns     |
|   |   |   | ADA          | adenosine deaminase                                                              | -2.6               | -2.6   | ns     |
|   |   |   | SP110        | SP110 nuclear body protein                                                       | -2.6               | -2.6   | ns     |
|   |   |   | PLAAT4       | phospholipase A and acyltransferase 4                                            | -2.5               | -2.6   | ns     |
|   |   |   | ATP11A       | ATPase, class VI, type 11A                                                       | -2.6               | -2.6   | ns     |
|   |   |   | P3H1         | prolyl 3-hydroxylase 1                                                           | -2.6               | -2.3   | ns     |
|   |   |   | KCTD12       | potassium channel tetramerization domain containing 12                           | -2.2               | -2.6   | ns     |
|   |   |   | NCOA1        | nuclear receptor coactivator 1                                                   | -2.6               | -2.6   | ns     |
|   |   |   | SLC50A1      | solute carrier family 50 (sugar efflux transporter), member 1                    | -2.6               | -2.1   | ns     |
|   |   |   | LPCAT4       | lysophosphatidylcholine acyltransferase 4                                        | -2.5               | -2.2   | ns     |
|   |   |   | TMEM14A      | transmembrane protein 14A                                                        | -2.5               | -2.5   | ns     |
|   |   |   | GTPBP1       | GTP binding protein 1                                                            | -2.4               | -2.5   | ns     |
|   |   |   | GPX8         | glutathione peroxidase 8 (putative)                                              | -2.5               | -2.2   | ns     |
|   |   |   | FYB1         | FYN binding protein 1                                                            | -2.5               | -2.1   | ns     |
|   |   |   | HSPA2        | heat shock 70kDa protein 2                                                       | -2.5               | -2.4   | ns     |
|   |   |   | ASPSCR1      | alveolar soft part sarcoma chromosome region, candidate 1                        | -2.1               | -2.5   | ns     |
|   |   |   | RARS2        | arginyl-tRNA synthetase 2, mitochondrial                                         | -2.2               | -2.5   | ns     |
|   |   |   | GYS1         | glycogen synthase 1 (muscle)                                                     | -2.0               | -2.4   | ns     |
|   |   |   | FADS3        | fatty acid desaturase 3                                                          | -2.3               | -2.4   | ns     |
|   |   |   | CAPN2        | calpain 2, (m                                                                    | -2.0               | -2.4   | ns     |
|   |   |   | CPM          | carboxypeptidase M                                                               | -2.4               | -2.4   | ns     |
|   |   |   | DDX58        | DEAD (Asp-Glu-Ala-Asp) box polypeptide 58                                        | -2.4               | -2.2   | ns     |
|   |   |   | IFNGR2       | interferon gamma receptor 2 (interferon gamma transducer 1)                      | -2.3               | -2.4   | ns     |
|   |   |   | PLS3         | plastin 3                                                                        | -2.3               | -2.2   | ns     |
|   |   |   | IFNAR2       | interferon (alpha, beta and omega) receptor 2                                    | -2.3               | -2.1   | ns     |
|   |   |   | FSTL1        | folliculin like 1                                                                | -2.3               | -2.3   | ns     |
|   |   |   | IFNAR1       | interferon (alpha, beta and omega) receptor 1                                    | -2.3               | -2.0   | ns     |
|   |   |   | PSMB10       | proteasome subunit beta 10                                                       | -2.2               | -2.3   | ns     |
|   |   |   | APH1B        | APH1B gamma secretase subunit                                                    | -2.3               | -2.1   | ns     |
|   |   |   | CAPG         | capping protein (actin filament), gelsolin-like                                  | -2.3               | -2.2   | ns     |
|   |   |   | ADAM9        | ADAM metalloproteinase domain 9                                                  | -2.3               | -2.0   | ns     |
|   |   |   | ADAM15       | ADAM metalloproteinase domain 15                                                 | -2.2               | -2.2   | ns     |
|   |   |   | ID1          | inhibitor of DNA binding 1, dominant negative helix-loop-helix protein           | -2.2               | -2.2   | ns     |
|   |   |   | ABRA1        | ABRA C-terminal like                                                             | -2.2               | -2.2   | ns     |
|   |   |   | DPP7         | dipeptidyl-peptidase 7                                                           | -2.2               | -2.1   | ns     |
|   |   |   | LOC100132215 | uncharacterized LOC100132215                                                     | -2.2               | -2.1   | ns     |
|   |   |   | POGLUT2      | protein O-glucosyltransferase 2                                                  | -2.2               | -2.1   | ns     |
|   |   |   | LASP1        | LIM and SH3 protein 1                                                            | -2.2               | -2.2   | ns     |
|   |   |   | SIK1         | salt-inducible kinase 1                                                          | -2.2               | -2.0   | ns     |

| S | C | E | Symbol   | Name                                                                     | Linear Fold Change |        |        |
|---|---|---|----------|--------------------------------------------------------------------------|--------------------|--------|--------|
|   |   |   |          |                                                                          | S vs C             | S vs E | E vs C |
|   |   |   | SP100    | SP100 nuclear antigen                                                    | -2.1               | -2.2   | ns     |
|   |   |   | CHIC2    | cysteine rich hydrophobic domain 2                                       | -2.1               | -2.1   | ns     |
|   |   |   | MGLL     | monoglyceride lipase                                                     | -2.1               | -2.1   | ns     |
|   |   |   | PRCP     | prolylcarboxypeptidase                                                   | -2.0               | -2.0   | ns     |
|   |   |   | ADGRL4   | adhesion G protein-coupled receptor L4                                   | 6.6                | ns     | 22.0   |
|   |   |   | KDR      | kinase insert domain receptor                                            | 13.1               | ns     | 5.8    |
|   |   |   | SNRPN    | small nuclear ribonucleoprotein polypeptide N                            | 4.6                | ns     | 11.4   |
|   |   |   | CD34     | CD34 molecule                                                            | 10.1               | ns     | 5.9    |
|   |   |   | CLEC3B   | C-type lectin domain family 3, member B                                  | 4.1                | ns     | 10.1   |
|   |   |   | TM4SF1   | transmembrane 4 L six family member 1                                    | 4.8                | ns     | 10.0   |
|   |   |   | PREX2    | phosphatidylinositol-3,4,5-trisphosphate-dependent Rac exchange factor 2 | 9.6                | ns     | 4.4    |
|   |   |   | A2M      | alpha-2-macroglobulin                                                    | 4.0                | ns     | 9.0    |
|   |   |   | IL33     | interleukin 33                                                           | 8.6                | ns     | 6.5    |
|   |   |   | MYCT1    | myc target 1                                                             | 8.2                | ns     | 7.0    |
|   |   |   | RAMP2    | receptor (G protein-coupled) activity modifying protein 2                | 7.8                | ns     | 6.4    |
|   |   |   | CACHD1   | cache domain containing 1                                                | 6.3                | ns     | 3.2    |
|   |   |   | CALCRL   | calcitonin receptor like receptor                                        | 2.8                | ns     | 6.1    |
|   |   |   | TRPC6    | transient receptor potential cation channel, subfamily C, member 6       | 6.1                | ns     | 5.9    |
|   |   |   | IL1A     | interleukin 1 alpha                                                      | 3.0                | ns     | 5.8    |
|   |   |   | S1PR1    | sphingosine-1-phosphate receptor 1                                       | 5.8                | ns     | 5.7    |
|   |   |   | ARHGEF6  | Rac                                                                      | 5.8                | ns     | 5.6    |
|   |   |   | PPP1R14A | protein phosphatase 1, regulatory (inhibitor) subunit 14A                | 3.6                | ns     | 5.4    |
|   |   |   | ACTA2    | actin, alpha 2, smooth muscle, aorta                                     | 4.4                | ns     | 5.3    |
|   |   |   | IDO1     | indoleamine 2,3-dioxygenase 1                                            | 4.1                | ns     | 5.2    |
|   |   |   | DYNC2H1  | dynein, cytoplasmic 2, heavy chain 1                                     | 2.7                | ns     | 4.9    |
|   |   |   | GMFG     | glia maturation factor, gamma                                            | 3.3                | ns     | 4.8    |
|   |   |   | MERTK    | MER proto-oncogene, tyrosine kinase                                      | 2.7                | ns     | 4.8    |
|   |   |   | PRKAR2B  | protein kinase, cAMP-dependent, regulatory, type II, beta                | 4.8                | ns     | 2.5    |
|   |   |   | WLS      | wntless Wnt ligand secretion mediator                                    | 4.7                | ns     | 3.4    |
|   |   |   | ZSWIM6   | zinc finger, SWIM-type containing 6                                      | 3.3                | ns     | 4.6    |
|   |   |   | SDC2     | syndecan 2                                                               | 2.3                | ns     | 4.3    |
|   |   |   | IGF1     | insulin-like growth factor 1 (somatomedin C)                             | 3.5                | ns     | 4.3    |
|   |   |   | IRS1     | insulin receptor substrate 1                                             | 2.4                | ns     | 4.3    |
|   |   |   | EBF1     | early B-cell factor 1                                                    | 4.2                | ns     | 3.9    |
|   |   |   | NID1     | nidogen 1                                                                | 4.2                | ns     | 3.7    |
|   |   |   | NPL      | N-acetylneuraminase pyruvate lyase (dihydrodipicolinate synthase)        | 4.1                | ns     | 2.4    |
|   |   |   | VAMP5    | vesicle associated membrane protein 5                                    | 4.1                | ns     | 4.0    |
|   |   |   | DOCK4    | dedicator of cytokinesis 4                                               | 2.1                | ns     | 4.1    |
|   |   |   | SNAI2    | snail family zinc finger 2                                               | 4.0                | ns     | 2.7    |
|   |   |   | ASS1     | argininosuccinate synthase 1                                             | 3.9                | ns     | 2.9    |
|   |   |   | ABCC9    | ATP binding cassette subfamily C member 9                                | 3.1                | ns     | 3.8    |
|   |   |   | TCF4     | transcription factor 4                                                   | 3.8                | ns     | 3.7    |
|   |   |   | DEFB109A | defensin beta 109A (pseudogene)                                          | 3.5                | ns     | 3.7    |
|   |   |   | ICA1     | islet cell autoantigen 1                                                 | 3.7                | ns     | 2.3    |
|   |   |   | SPRY2    | sprouty RTK signaling antagonist 2                                       | 2.1                | ns     | 3.7    |
|   |   |   | MTSS1    | metastasis suppressor 1                                                  | 3.7                | ns     | 2.2    |
|   |   |   | PTPRB    | protein tyrosine phosphatase, receptor type, B                           | 2.7                | ns     | 3.6    |
|   |   |   | FAT4     | FAT atypical cadherin 4                                                  | 3.5                | ns     | 2.9    |
|   |   |   | EPB41L2  | erythrocyte membrane protein band 4.1-like 2                             | 3.5                | ns     | 2.3    |
|   |   |   | PWAR5    | Prader Willi                                                             | 3.4                | ns     | 3.5    |
|   |   |   | MEIS1    | Meis homeobox 1                                                          | 3.4                | ns     | 3.3    |
|   |   |   | ANKRD44  | ankyrin repeat domain 44                                                 | 3.4                | ns     | 2.7    |
|   |   |   | CD93     | CD93 molecule                                                            | 2.9                | ns     | 3.2    |
|   |   |   | ETS1     | v-ets avian erythroblastosis virus E26 oncogene homolog 1                | 2.9                | ns     | 3.2    |
|   |   |   | MEF2C    | myocyte enhancer factor 2C                                               | 3.2                | ns     | 2.5    |

| S | C | E | Symbol       | Name                                                                     | Linear Fold Change |        |        |
|---|---|---|--------------|--------------------------------------------------------------------------|--------------------|--------|--------|
|   |   |   |              |                                                                          | S vs C             | S vs E | E vs C |
|   |   |   | EML1         | echinoderm microtubule associated protein like 1                         | 3.2                | ns     | 2.1    |
|   |   |   | LOC105373192 | uncharacterized LOC105373192                                             | 3.0                | ns     | 3.2    |
|   |   |   | PIK3R3       | phosphoinositide-3-kinase, regulatory subunit 3 (gamma)                  | 2.4                | ns     | 3.0    |
|   |   |   | EAF2         | ELL associated factor 2                                                  | 2.9                | ns     | 2.8    |
|   |   |   | ZEB2         | zinc finger E-box binding homeobox 2                                     | 2.8                | ns     | 2.2    |
|   |   |   | GLUL         | glutamate-ammonia ligase                                                 | 2.8                | ns     | 2.7    |
|   |   |   | ATP8A1       | ATPase, aminophospholipid transporter (APLT), class I, type 8A, member 1 | 2.6                | ns     | 2.6    |
|   |   |   | EFEMP1       | EGF containing fibulin-like extracellular matrix protein 1               | 2.6                | ns     | 2.4    |
|   |   |   | SSBP2        | single-stranded DNA binding protein 2                                    | 2.5                | ns     | 2.2    |
|   |   |   | ARHGEF26     | Rho guanine nucleotide exchange factor 26                                | 2.4                | ns     | 2.5    |
|   |   |   | C1QTNF1      | C1q and tumor necrosis factor related protein 1                          | 2.2                | ns     | 2.5    |
|   |   |   | TEC          | tec protein tyrosine kinase                                              | 2.3                | ns     | 2.5    |
|   |   |   | DEFB109B     | defensin beta 109B                                                       | 2.5                | ns     | 2.2    |
|   |   |   | RESF1        | retroelement silencing factor 1                                          | 2.4                | ns     | 2.1    |
|   |   |   | PLCG2        | phospholipase C, gamma 2 (phosphatidylinositol-specific)                 | 2.2                | ns     | 2.4    |
|   |   |   | FLI1         | Fli-1 proto-oncogene, ETS transcription factor                           | 2.1                | ns     | 2.4    |
|   |   |   | PCDH17       | protocadherin 17                                                         | 2.3                | ns     | 2.4    |
|   |   |   | PTPRJ        | protein tyrosine phosphatase, receptor type, J                           | 2.2                | ns     | 2.3    |
|   |   |   | LOC105375977 | uncharacterized LOC105375977                                             | 2.3                | ns     | 2.1    |
|   |   |   | SNORD114-2   | small nucleolar RNA, C                                                   | ns                 | 22.1   | ns     |
|   |   |   | SNORD114-6   | small nucleolar RNA, C                                                   | ns                 | 20.9   | ns     |
|   |   |   | SNORD114-7   | small nucleolar RNA, C                                                   | ns                 | 20.5   | ns     |
|   |   |   | SNORD114-19  | small nucleolar RNA, C                                                   | ns                 | 16.8   | ns     |
|   |   |   | SNORD114-12  | small nucleolar RNA, C                                                   | ns                 | 14.3   | ns     |
|   |   |   | ERVV-2       | endogenous retrovirus group V, member 2                                  | ns                 | 14.1   | ns     |
|   |   |   | CD36         | CD36 molecule (thrombospondin receptor)                                  | ns                 | 13.4   | ns     |
|   |   |   | ZNF117       | zinc finger protein 117                                                  | ns                 | 13.3   | ns     |
|   |   |   | SNORD114-15  | small nucleolar RNA, C                                                   | ns                 | 13.2   | ns     |
|   |   |   | PABPC4L      | poly(A) binding protein, cytoplasmic 4-like                              | ns                 | 13.0   | ns     |
|   |   |   | SNORD114-13  | small nucleolar RNA, C                                                   | ns                 | 12.2   | ns     |
|   |   |   | SNORD114-17  | small nucleolar RNA, C                                                   | ns                 | 12.2   | ns     |
|   |   |   | SNORD114-11  | small nucleolar RNA, C                                                   | ns                 | 11.6   | ns     |
|   |   |   | ERVV-1       | endogenous retrovirus group V, member 1                                  | ns                 | 10.7   | ns     |
|   |   |   | SNORD113-3   | small nucleolar RNA, C                                                   | ns                 | 10.7   | ns     |
|   |   |   | MIR503       | microRNA 503                                                             | ns                 | 10.2   | ns     |
|   |   |   | PCDH18       | protocadherin 18                                                         | 10.2               | ns     | ns     |
|   |   |   | PLAC1        | placenta specific 1                                                      | ns                 | 9.8    | ns     |
|   |   |   | LOC105378624 | uncharacterized LOC105378624                                             | ns                 | 9.5    | ns     |
|   |   |   | SNORD114-30  | small nucleolar RNA, C                                                   | ns                 | 9.4    | ns     |
|   |   |   | SNORD113-2   | small nucleolar RNA, C                                                   | ns                 | 9.0    | ns     |
|   |   |   | MIR1305      | microRNA 1305                                                            | ns                 | 8.9    | ns     |
|   |   |   | LINC01483    | long intergenic non-protein coding RNA 1483                              | ns                 | 8.7    | ns     |
|   |   |   | SNORD114-3   | small nucleolar RNA, C                                                   | ns                 | 8.7    | ns     |
|   |   |   | SNORD114-27  | small nucleolar RNA, C                                                   | ns                 | 8.5    | ns     |
|   |   |   | SNORD113-9   | small nucleolar RNA, C                                                   | ns                 | 8.2    | ns     |
|   |   |   | LOC105376127 | uncharacterized LOC105376127                                             | ns                 | 7.9    | ns     |
|   |   |   | SNORD114-21  | small nucleolar RNA, C                                                   | ns                 | 7.8    | ns     |
|   |   |   | PCDH11Y      | protocadherin 11 Y-linked                                                | ns                 | 7.4    | ns     |
|   |   |   | SNORD59A     | small nucleolar RNA, C                                                   | ns                 | 7.3    | ns     |
|   |   |   | SNORD114-1   | small nucleolar RNA, C                                                   | ns                 | 7.2    | ns     |
|   |   |   | PSG6         | pregnancy specific beta-1-glycoprotein 6                                 | ns                 | 7.1    | ns     |
|   |   |   | CHODL-AS1    | CHODL antisense RNA 1                                                    | ns                 | 7.1    | ns     |
|   |   |   | PSG11        | pregnancy specific beta-1-glycoprotein 11                                | ns                 | 6.9    | ns     |
|   |   |   | TCF21        | transcription factor 21                                                  | ns                 | 6.8    | ns     |
|   |   |   | SCARNA2      | small Cajal body-specific RNA 2                                          | ns                 | 6.5    | ns     |



| S | C | E | Symbol       | Name                                                                                 | Linear Fold Change |        |        |
|---|---|---|--------------|--------------------------------------------------------------------------------------|--------------------|--------|--------|
|   |   |   |              |                                                                                      | S vs C             | S vs E | E vs C |
|   |   |   | ARHGAP26-IT1 | ARHGAP26 intronic transcript 1                                                       | ns                 | 6.4    | ns     |
|   |   |   | SNORD114-22  | small nucleolar RNA, C                                                               | ns                 | 6.4    | ns     |
|   |   |   | OLR1         | oxidized low density lipoprotein (lectin-like) receptor 1                            | ns                 | 6.3    | ns     |
|   |   |   | ADGRL2       | adhesion G protein-coupled receptor L2                                               | 6.2                | ns     | ns     |
|   |   |   | LOC105375401 | uncharacterized LOC105375401                                                         | ns                 | 6.2    | ns     |
|   |   |   | LOC101927745 | uncharacterized LOC101927745                                                         | ns                 | 6.2    | ns     |
|   |   |   | MIR4659B     | microRNA 4659b                                                                       | ns                 | 6.2    | ns     |
|   |   |   | CLIP4        | CAP-GLY domain containing linker protein family, member 4                            | ns                 | 6.1    | ns     |
|   |   |   | PLCE1-AS1    | PLCE1 antisense RNA 1                                                                | ns                 | 6.0    | ns     |
|   |   |   | MORC4        | MORC family CW-type zinc finger 4                                                    | ns                 | 6.0    | ns     |
|   |   |   | L1TD1        | LINE-1 type transposase domain containing 1                                          | ns                 | 5.9    | ns     |
|   |   |   | LOC101929607 | uncharacterized LOC101929607                                                         | ns                 | 5.9    | ns     |
|   |   |   | GNG11        | guanine nucleotide binding protein (G protein), gamma 11                             | 5.8                | ns     | ns     |
|   |   |   | LOC105370804 | uncharacterized LOC105370804                                                         | ns                 | 5.8    | ns     |
|   |   |   | LOC220729    | succinate dehydrogenase complex, subunit A, flavoprotein (Fp) pseudogene             | ns                 | 5.7    | ns     |
|   |   |   | CASC9        | cancer susceptibility candidate 9 (non-protein coding)                               | ns                 | 5.7    | ns     |
|   |   |   | HELLS        | helicase, lymphoid-specific                                                          | ns                 | 5.6    | ns     |
|   |   |   | SLIT2        | slit guidance ligand 2                                                               | ns                 | 5.6    | ns     |
|   |   |   | TLL1         | tolloid like 1                                                                       | 5.5                | ns     | ns     |
|   |   |   | RAB3B        | RAB3B, member RAS oncogene family                                                    | ns                 | 5.5    | ns     |
|   |   |   | FBN2         | fibrillin 2                                                                          | ns                 | 5.5    | ns     |
|   |   |   | ENPEP        | glutamyl aminopeptidase (aminopeptidase A)                                           | 5.5                | ns     | ns     |
|   |   |   | LOC101927685 | heat shock transcription factor, X-linked-like                                       | ns                 | 5.5    | ns     |
|   |   |   | LOC100508631 | uncharacterized LOC100508631                                                         | ns                 | 5.4    | ns     |
|   |   |   | MAEL         | maelstrom spermatogenic transposon silencer                                          | ns                 | 5.3    | ns     |
|   |   |   | SIK3-IT1     | SIK3 intronic transcript 1                                                           | ns                 | 5.2    | ns     |
|   |   |   | SHANK2       | SH3 and multiple ankyrin repeat domains 2                                            | ns                 | 5.2    | ns     |
|   |   |   | ACP3         | acid phosphatase 3                                                                   | ns                 | 5.2    | ns     |
|   |   |   | NRK          | Nik related kinase                                                                   | ns                 | 5.2    | ns     |
|   |   |   | LOC102725247 | uncharacterized LOC102725247                                                         | ns                 | 5.1    | ns     |
|   |   |   | CD200        | CD200 molecule                                                                       | ns                 | 5.1    | ns     |
|   |   |   | MEG8         | maternally expressed 8 (non-protein coding)                                          | ns                 | 5.1    | ns     |
|   |   |   | SNORD13P2    | small nucleolar RNA, C                                                               | ns                 | 5.0    | ns     |
|   |   |   | AKR1B15      | aldo-keto reductase family 1, member B15                                             | ns                 | 4.9    | ns     |
|   |   |   | LRCH2        | leucine-rich repeats and calponin homology (CH) domain containing 2                  | 4.9                | ns     | ns     |
|   |   |   | SLC16A10     | solute carrier family 16 (aromatic amino acid transporter), member 10                | ns                 | 4.9    | ns     |
|   |   |   | DLG5         | discs, large homolog 5 (Drosophila)                                                  | ns                 | 4.9    | ns     |
|   |   |   | DHRS2        | dehydrogenase                                                                        | ns                 | 4.9    | ns     |
|   |   |   | GUCY1A2      | guanylate cyclase 1, soluble, alpha 2                                                | 4.8                | ns     | ns     |
|   |   |   | NFE2L3       | nuclear factor, erythroid 2-like 3                                                   | ns                 | 4.8    | ns     |
|   |   |   | SNORD116-21  | small nucleolar RNA, C                                                               | 4.7                | ns     | ns     |
|   |   |   | MIRLET7F1    | microRNA let-7f-1                                                                    | ns                 | 4.7    | ns     |
|   |   |   | SNORD113-7   | small nucleolar RNA, C                                                               | ns                 | 4.7    | ns     |
|   |   |   | LOC105376236 | uncharacterized LOC105376236                                                         | ns                 | 4.6    | ns     |
|   |   |   | RASSF6       | Ras association (RalGDS                                                              | ns                 | 4.6    | ns     |
|   |   |   | S100A9       | S100 calcium binding protein A9                                                      | ns                 | 4.6    | ns     |
|   |   |   | BDP1         | B double prime 1, subunit of RNA polymerase III transcription initiation factor IIIB | ns                 | 4.6    | ns     |
|   |   |   | PSG4         | pregnancy specific beta-1-glycoprotein 4                                             | ns                 | 4.6    | ns     |
|   |   |   | OR52E6       | olfactory receptor, family 52, subfamily E, member 6                                 | ns                 | 4.5    | ns     |
|   |   |   | HAPLN1       | hyaluronan and proteoglycan link protein 1                                           | ns                 | 4.4    | ns     |
|   |   |   | LOC105377649 | uncharacterized LOC105377649                                                         | ns                 | 4.4    | ns     |
|   |   |   | LOC105371225 | uncharacterized LOC105371225                                                         | ns                 | 4.4    | ns     |
|   |   |   | LIPG         | lipase, endothelial                                                                  | ns                 | 4.4    | ns     |
|   |   |   | GH1          | growth hormone 1                                                                     | ns                 | 4.4    | ns     |
|   |   |   | SNORD114-8   | small nucleolar RNA, C                                                               | ns                 | 4.4    | ns     |



| S | C | E | Symbol       | Name                                                                 | Linear Fold Change |        |        |
|---|---|---|--------------|----------------------------------------------------------------------|--------------------|--------|--------|
|   |   |   |              |                                                                      | S vs C             | S vs E | E vs C |
|   |   |   | OR7E91P      | olfactory receptor, family 7, subfamily E, member 91 pseudogene      | ns                 | 4.3    | ns     |
|   |   |   | CCDC68       | coiled-coil domain containing 68                                     | ns                 | 4.3    | ns     |
|   |   |   | XDH          | xanthine dehydrogenase                                               | ns                 | 4.3    | ns     |
|   |   |   | COL6A3       | collagen, type VI, alpha 3                                           | 4.3                | ns     | ns     |
|   |   |   | LOC101927359 | uncharacterized LOC101927359                                         | ns                 | 4.3    | ns     |
|   |   |   | LOC644919    | uncharacterized LOC644919                                            | ns                 | 4.3    | ns     |
|   |   |   | NDNF         | neuron-derived neurotrophic factor                                   | 4.2                | ns     | ns     |
|   |   |   | TUSC3        | tumor suppressor candidate 3                                         | ns                 | 4.2    | ns     |
|   |   |   | LOC105377196 | uncharacterized LOC105377196                                         | ns                 | 4.2    | ns     |
|   |   |   | PDE3B        | phosphodiesterase 3B, cGMP-inhibited                                 | ns                 | 4.2    | ns     |
|   |   |   | LOC101928794 | uncharacterized LOC101928794                                         | ns                 | 4.2    | ns     |
|   |   |   | CXADRP2      | coxsackie virus and adenovirus receptor pseudogene 2                 | ns                 | 4.2    | ns     |
|   |   |   | ITGB3        | integrin beta 3                                                      | 4.2                | ns     | ns     |
|   |   |   | MIR29C       | microRNA 29c                                                         | ns                 | 4.2    | ns     |
|   |   |   | CDS1         | CDP-diacylglycerol synthase 1                                        | ns                 | 4.2    | ns     |
|   |   |   | GUCY1A1      | guanylate cyclase 1 soluble subunit alpha 1                          | 4.2                | ns     | ns     |
|   |   |   | MAP3K13      | mitogen-activated protein kinase kinase kinase 13                    | ns                 | 4.1    | ns     |
|   |   |   | DAB2         | Dab, mitogen-responsive phosphoprotein, homolog 2 (Drosophila)       | ns                 | 4.1    | ns     |
|   |   |   | NAALADL2-AS3 | NAALADL2 antisense RNA 3                                             | ns                 | 4.1    | ns     |
|   |   |   | PSG2         | pregnancy specific beta-1-glycoprotein 2                             | ns                 | 4.0    | ns     |
|   |   |   | LOC102723920 | uncharacterized LOC102723920                                         | ns                 | 4.0    | ns     |
|   |   |   | SLC30A2      | solute carrier family 30 (zinc transporter), member 2                | ns                 | 4.0    | ns     |
|   |   |   | CKAP2L       | cytoskeleton associated protein 2-like                               | ns                 | 4.0    | ns     |
|   |   |   | FCGR2B       | Fc fragment of IgG, low affinity IIb, receptor (CD32)                | 3.9                | ns     | ns     |
|   |   |   | MIR3650      | microRNA 3650                                                        | ns                 | 3.9    | ns     |
|   |   |   | ZNF354B      | zinc finger protein 354B                                             | ns                 | 3.9    | ns     |
|   |   |   | MIR17HG      | miR-17-92 cluster host gene                                          | ns                 | 3.9    | ns     |
|   |   |   | LINC00622    | long intergenic non-protein coding RNA 622                           | ns                 | 3.9    | ns     |
|   |   |   | LOC100507487 | uncharacterized LOC100507487                                         | ns                 | 3.9    | ns     |
|   |   |   | RHOBTB3      | Rho-related BTB domain containing 3                                  | ns                 | 3.9    | ns     |
|   |   |   | LOC102723908 | uncharacterized LOC102723908                                         | ns                 | 3.9    | ns     |
|   |   |   | PSCA         | prostate stem cell antigen                                           | ns                 | 3.9    | ns     |
|   |   |   | C2orf81      | chromosome 2 open reading frame 81                                   | ns                 | 3.8    | ns     |
|   |   |   | MGC12916     | uncharacterized protein MGC12916                                     | ns                 | 3.7    | ns     |
|   |   |   | LOC105378300 | uncharacterized LOC105378300                                         | ns                 | 3.8    | ns     |
|   |   |   | TCHHL1       | trichohyalin like 1                                                  | ns                 | 3.8    | ns     |
|   |   |   | LOC105369897 | uncharacterized LOC105369897                                         | ns                 | 3.8    | ns     |
|   |   |   | IL1RAPL2     | interleukin 1 receptor accessory protein-like 2                      | ns                 | 3.7    | ns     |
|   |   |   | AGO2         | argonaute RISC catalytic component 2                                 | ns                 | 3.7    | ns     |
|   |   |   | PBK          | PDZ binding kinase                                                   | ns                 | 3.7    | ns     |
|   |   |   | EMSY         | EMSY BRCA2-interacting transcriptional repressor                     | ns                 | 3.7    | ns     |
|   |   |   | SDHAP2       | succinate dehydrogenase complex subunit A, flavoprotein pseudogene 2 | ns                 | 3.7    | ns     |
|   |   |   | PLGLB1       | plasminogen-like B1                                                  | ns                 | 3.7    | ns     |
|   |   |   | SEMA6D       | semaphorin 6D                                                        | ns                 | 3.7    | ns     |
|   |   |   | TMEM247      | transmembrane protein 247                                            | ns                 | 3.7    | ns     |
|   |   |   | ZNF521       | zinc finger protein 521                                              | 3.6                | ns     | ns     |
|   |   |   | DUBR         | DPPA2 upstream binding RNA                                           | ns                 | 3.6    | ns     |
|   |   |   | NAALADL2     | N-acetylated alpha-linked acidic dipeptidase-like 2                  | ns                 | 3.6    | ns     |
|   |   |   | TAB3         | TGF-beta activated kinase 1                                          | ns                 | 3.6    | ns     |
|   |   |   | LRRN3        | leucine rich repeat neuronal 3                                       | ns                 | 3.6    | ns     |
|   |   |   | SLC6A15      | solute carrier family 6 (neutral amino acid transporter), member 15  | ns                 | 3.6    | ns     |
|   |   |   | GTF2IP20     | general transcription factor Ili pseudogene 20                       | ns                 | 3.5    | ns     |
|   |   |   | RBMS3        | RNA binding motif, single stranded interacting protein 3             | ns                 | 3.5    | ns     |
|   |   |   | PDZD2        | PDZ domain containing 2                                              | ns                 | 3.5    | ns     |
|   |   |   | LOC100134868 | uncharacterized LOC100134868                                         | ns                 | 3.5    | ns     |

| S | C | E | Symbol       | Name                                                                 | Linear Fold Change |        |        |
|---|---|---|--------------|----------------------------------------------------------------------|--------------------|--------|--------|
|   |   |   |              |                                                                      | S vs C             | S vs E | E vs C |
|   |   |   | ADIRF        | adipogenesis regulatory factor                                       | 3.5                | ns     | ns     |
|   |   |   | MIR487B      | microRNA 487b                                                        | ns                 | 3.5    | ns     |
|   |   |   | LOC102723439 | uncharacterized LOC102723439                                         | ns                 | 3.5    | ns     |
|   |   |   | SNORA38B     | small nucleolar RNA, H                                               | ns                 | 3.5    | ns     |
|   |   |   | KCNK5        | potassium channel, two pore domain subfamily K, member 5             | ns                 | 3.5    | ns     |
|   |   |   | OGFRL1       | opioid growth factor receptor-like 1                                 | 3.4                | ns     | ns     |
|   |   |   | TFRC         | transferrin receptor                                                 | ns                 | 3.4    | ns     |
|   |   |   | SCN9A        | sodium channel, voltage gated, type IX alpha subunit                 | ns                 | 3.4    | ns     |
|   |   |   | LONP2        | lon peptidase 2, peroxisomal                                         | ns                 | 3.4    | ns     |
|   |   |   | ATG9B        | autophagy related 9B                                                 | ns                 | 3.4    | ns     |
|   |   |   | SERPINF1     | serpin peptidase inhibitor F1                                        | ns                 | 3.4    | ns     |
|   |   |   | MIRLET7G     | microRNA let-7g                                                      | ns                 | 3.4    | ns     |
|   |   |   | RAPGEF5      | Rap guanine nucleotide exchange factor 5                             | 3.4                | ns     | ns     |
|   |   |   | EXOC6        | exocyst complex component 6                                          | 3.4                | ns     | ns     |
|   |   |   | CARD17       | caspase recruitment domain family, member 17                         | ns                 | 3.4    | ns     |
|   |   |   | FBXO9        | F-box protein 9                                                      | ns                 | 3.4    | ns     |
|   |   |   | MTNR1B       | melatonin receptor 1B                                                | ns                 | 3.4    | ns     |
|   |   |   | LOC389765    | kinesin family member 27 pseudogene                                  | ns                 | 3.4    | ns     |
|   |   |   | ZNF83        | zinc finger protein 83                                               | ns                 | 3.3    | ns     |
|   |   |   | MIR581       | microRNA 581                                                         | ns                 | 3.3    | ns     |
|   |   |   | ARL15        | ADP-ribosylation factor like GTPase 15                               | ns                 | 3.3    | ns     |
|   |   |   | LINC01091    | long intergenic non-protein coding RNA 1091                          | ns                 | 3.3    | ns     |
|   |   |   | LOC102724917 | uncharacterized LOC102724917                                         | ns                 | 3.3    | ns     |
|   |   |   | SDHAP1       | succinate dehydrogenase complex subunit A, flavoprotein pseudogene 1 | ns                 | 3.3    | ns     |
|   |   |   | NFIB         | nuclear factor I                                                     | 3.3                | ns     | ns     |
|   |   |   | RIMKLB       | ribosomal modification protein rimK-like family member B             | ns                 | 3.3    | ns     |
|   |   |   | LOC101929787 | uncharacterized LOC101929787                                         | ns                 | 3.3    | ns     |
|   |   |   | DUSP6        | dual specificity phosphatase 6                                       | 3.3                | ns     | ns     |
|   |   |   | RNF43        | ring finger protein 43                                               | ns                 | 3.3    | ns     |
|   |   |   | LOC100133331 | uncharacterized LOC100133331                                         | ns                 | 3.3    | ns     |
|   |   |   | XKRX         | X-linked Kx blood group related, X-linked                            | ns                 | 3.3    | ns     |
|   |   |   | LOC101926892 | uncharacterized LOC101926892                                         | ns                 | 3.3    | ns     |
|   |   |   | LOC101928324 | uncharacterized LOC101928324                                         | ns                 | 3.3    | ns     |
|   |   |   | CYTH3        | cytohesin 3                                                          | ns                 | 3.3    | ns     |
|   |   |   | ITGBL1       | integrin beta like 1                                                 | ns                 | 3.2    | ns     |
|   |   |   | NPIP4        | nuclear pore complex interacting protein family, member B4           | ns                 | 3.2    | ns     |
|   |   |   | LINC01355    | long intergenic non-protein coding RNA 1355                          | ns                 | 3.2    | ns     |
|   |   |   | CLMN         | calmin (calponin-like, transmembrane)                                | ns                 | 3.2    | ns     |
|   |   |   | ZFP2         | ZFP2 zinc finger protein                                             | ns                 | 3.2    | ns     |
|   |   |   | DVL3         | dishevelled segment polarity protein 3                               | ns                 | 3.2    | ns     |
|   |   |   | NIPAL1       | NIPA-like domain containing 1                                        | ns                 | 3.2    | ns     |
|   |   |   | WARS1        | tryptophanyl-tRNA synthetase 1                                       | 3.2                | ns     | ns     |
|   |   |   | TTBK2        | tau tubulin kinase 2                                                 | ns                 | 3.2    | ns     |
|   |   |   | SYCP2L       | synaptonemal complex protein 2-like                                  | ns                 | 3.2    | ns     |
|   |   |   | SNAR-G1      | small ILF3                                                           | ns                 | 3.2    | ns     |
|   |   |   | HBA2         | hemoglobin, alpha 2                                                  | 3.2                | ns     | ns     |
|   |   |   | LINC00939    | long intergenic non-protein coding RNA 939                           | ns                 | 3.2    | ns     |
|   |   |   | MMD          | monocyte to macrophage differentiation-associated                    | ns                 | 3.2    | ns     |
|   |   |   | CYYR1        | cysteine                                                             | 3.2                | ns     | ns     |
|   |   |   | CLIP1-AS1    | CLIP1 antisense RNA 1                                                | ns                 | 3.2    | ns     |
|   |   |   | SCIN         | scinderin                                                            | ns                 | 3.2    | ns     |
|   |   |   | ST3GAL4      | ST3 beta-galactoside alpha-2,3-sialyltransferase 4                   | ns                 | 3.1    | ns     |
|   |   |   | ELMO1-AS1    | ELMO1 antisense RNA 1                                                | ns                 | 3.1    | ns     |
|   |   |   | RGPD6        | RANBP2-like and GRIP domain containing 6                             | ns                 | 3.1    | ns     |
|   |   |   | IKZF2        | IKAROS family zinc finger 2                                          | ns                 | 3.1    | ns     |

| S | C | E | Symbol       | Name                                                                                                 | Linear Fold Change |        |        |
|---|---|---|--------------|------------------------------------------------------------------------------------------------------|--------------------|--------|--------|
|   |   |   |              |                                                                                                      | S vs C             | S vs E | E vs C |
|   |   |   | SLC45A4      | solute carrier family 45, member 4                                                                   | 3.1                | ns     | ns     |
|   |   |   | FAM124B      | family with sequence similarity 124 member B                                                         | ns                 | 3.1    | ns     |
|   |   |   | BEX2         | brain expressed X-linked 2                                                                           | ns                 | 3.1    | ns     |
|   |   |   | OCLN         | occludin                                                                                             | ns                 | 3.1    | ns     |
|   |   |   | SPIRE2       | spire-type actin nucleation factor 2                                                                 | ns                 | 3.1    | ns     |
|   |   |   | LOC101928344 | protein GVQW1-like                                                                                   | ns                 | 3.1    | ns     |
|   |   |   | RGPD8        | RANBP2-like and GRIP domain containing 8                                                             | ns                 | 3.1    | ns     |
|   |   |   | SYNJ1        | synaptojanin 1                                                                                       | ns                 | 3.1    | ns     |
|   |   |   | DHCR24       | 24-dehydrocholesterol reductase                                                                      | ns                 | 3.1    | ns     |
|   |   |   | LOC100505938 | uncharacterized LOC100505938                                                                         | ns                 | 3.1    | ns     |
|   |   |   | PLSCR4       | phospholipid scramblase 4                                                                            | 3.1                | ns     | ns     |
|   |   |   | C21orf91     | chromosome 21 open reading frame 91                                                                  | ns                 | 3.1    | ns     |
|   |   |   | LRRTM2       | leucine rich repeat transmembrane neuronal 2                                                         | ns                 | 3.1    | ns     |
|   |   |   | GPNMB        | glycoprotein (transmembrane) nmb                                                                     | 3.1                | ns     | ns     |
|   |   |   | CCNE2        | cyclin E2                                                                                            | ns                 | 3.0    | ns     |
|   |   |   | SH3GLB2      | SH3-domain GRB2-like endophilin B2                                                                   | ns                 | 3.0    | ns     |
|   |   |   | DHRX         | dehydrogenase                                                                                        | ns                 | 3.0    | ns     |
|   |   |   | LOC101929494 | uncharacterized LOC101929494                                                                         | ns                 | 3.0    | ns     |
|   |   |   | GJC1         | gap junction protein gamma 1                                                                         | 3.0                | ns     | ns     |
|   |   |   | ORC6         | origin recognition complex subunit 6                                                                 | ns                 | 3.0    | ns     |
|   |   |   | STX3         | syntaxin 3                                                                                           | ns                 | 3.0    | ns     |
|   |   |   | CCNB2        | cyclin B2                                                                                            | ns                 | 2.9    | ns     |
|   |   |   | SLIT2-IT1    | SLIT2 intronic transcript 1                                                                          | ns                 | 3.0    | ns     |
|   |   |   | CEP152       | centrosomal protein 152kDa                                                                           | ns                 | 3.0    | ns     |
|   |   |   | SH3GL1P2     | SH3-domain GRB2-like 1 pseudogene 2                                                                  | ns                 | 3.0    | ns     |
|   |   |   | LOC105371471 | uncharacterized LOC105371471                                                                         | ns                 | 3.0    | ns     |
|   |   |   | SPDYE6       | speedy                                                                                               | ns                 | 3.0    | ns     |
|   |   |   | LOC105374911 | uncharacterized LOC105374911                                                                         | ns                 | 3.0    | ns     |
|   |   |   | MIR223       | microRNA 223                                                                                         | ns                 | 3.0    | ns     |
|   |   |   | CSGALNACT1   | chondroitin sulfate N-acetylgalactosaminyltransferase 1                                              | ns                 | 3.0    | ns     |
|   |   |   | PAQR7        | progesterin and adipoQ receptor family member VII                                                    | ns                 | 3.0    | ns     |
|   |   |   | CGB7         | chorionic gonadotropin, beta polypeptide 7                                                           | ns                 | 2.9    | ns     |
|   |   |   | ADGRG1       | adhesion G protein-coupled receptor G1                                                               | ns                 | 2.9    | ns     |
|   |   |   | MIR218-1     | microRNA 218-1                                                                                       | ns                 | 2.9    | ns     |
|   |   |   | ZNF250       | zinc finger protein 250                                                                              | ns                 | 2.9    | ns     |
|   |   |   | AMMECR1      | Alport syndrome, mental retardation, midface hypoplasia and elliptocytosis chromosomal region gene 1 | ns                 | 2.9    | ns     |
|   |   |   | LOC101930100 | uncharacterized LOC101930100                                                                         | ns                 | 2.9    | ns     |
|   |   |   | LOC100133091 | uncharacterized LOC100133091                                                                         | ns                 | 2.9    | ns     |
|   |   |   | LRIG3        | leucine-rich repeats and immunoglobulin-like domains 3                                               | 2.9                | ns     | ns     |
|   |   |   | LOC101929709 | uncharacterized LOC101929709                                                                         | ns                 | 2.9    | ns     |
|   |   |   | EPHB4        | EPH receptor B4                                                                                      | ns                 | 2.9    | ns     |
|   |   |   | ANKRD20A2P   | ankyrin repeat domain 20 family member A2, pseudogene                                                | ns                 | 2.9    | ns     |
|   |   |   | TRIM25       | tripartite motif containing 25                                                                       | ns                 | 2.9    | ns     |
|   |   |   | PDXDC2P      | pyridoxal-dependent decarboxylase domain containing 2, pseudogene                                    | ns                 | 2.9    | ns     |
|   |   |   | GGCT         | gamma-glutamylcyclotransferase                                                                       | ns                 | 2.9    | ns     |
|   |   |   | LOC105369204 | uncharacterized LOC105369204                                                                         | 2.9                | ns     | ns     |
|   |   |   | ACADVL       | acyl-CoA dehydrogenase, very long chain                                                              | ns                 | 2.9    | ns     |
|   |   |   | BTG2         | BTG family, member 2                                                                                 | 2.9                | ns     | ns     |
|   |   |   | BCL2         | B-cell CLL                                                                                           | 2.9                | ns     | ns     |
|   |   |   | AUNIP        | aurora kinase A and ninein interacting protein                                                       | ns                 | 2.9    | ns     |
|   |   |   | SH2D4A       | SH2 domain containing 4A                                                                             | ns                 | 2.9    | ns     |
|   |   |   | LIN28B       | lin-28 homolog B (C. elegans)                                                                        | ns                 | 2.9    | ns     |
|   |   |   | MCM6         | minichromosome maintenance complex component 6                                                       | ns                 | 2.9    | ns     |
|   |   |   | AGL          | amylo-alpha-1, 6-glucosidase, 4-alpha-glucanotransferase                                             | ns                 | 2.9    | ns     |
|   |   |   | ARRDC3-AS1   | ARRDC3 antisense RNA 1                                                                               | ns                 | 2.9    | ns     |

| S | C | E | Symbol       | Name                                                                                           | Linear Fold Change |        |        |
|---|---|---|--------------|------------------------------------------------------------------------------------------------|--------------------|--------|--------|
|   |   |   |              |                                                                                                | S vs C             | S vs E | E vs C |
|   |   |   | TOMM34       | translocase of outer mitochondrial membrane 34                                                 | ns                 | 2.9    | ns     |
|   |   |   | CNN3         | calponin 3, acidic                                                                             | ns                 | 2.9    | ns     |
|   |   |   | VSTM5        | V-set and transmembrane domain containing 5                                                    | ns                 | 2.8    | ns     |
|   |   |   | LOC100506606 | uncharacterized LOC100506606                                                                   | ns                 | 2.8    | ns     |
|   |   |   | REG-AS1      | REG antisense RNA 1                                                                            | ns                 | 2.8    | ns     |
|   |   |   | LOC105376073 | uncharacterized LOC105376073                                                                   | ns                 | 2.8    | ns     |
|   |   |   | MIR521-1     | microRNA 521-1                                                                                 | ns                 | 2.8    | ns     |
|   |   |   | LOC101930131 | uncharacterized LOC101930131                                                                   | ns                 | 2.8    | ns     |
|   |   |   | PGF          | placental growth factor                                                                        | ns                 | 2.8    | ns     |
|   |   |   | NUFIP2       | nuclear fragile X mental retardation protein interacting protein 2                             | ns                 | 2.8    | ns     |
|   |   |   | SECISBP2L    | SECIS binding protein 2-like                                                                   | ns                 | 2.8    | ns     |
|   |   |   | MAP3K4       | mitogen-activated protein kinase kinase kinase 4                                               | ns                 | 2.8    | ns     |
|   |   |   | AKTIP        | AKT interacting protein                                                                        | ns                 | 2.8    | ns     |
|   |   |   | ZC2HC1A      | zinc finger, C2HC-type containing 1A                                                           | ns                 | 2.8    | ns     |
|   |   |   | RPIA         | ribose 5-phosphate isomerase A                                                                 | ns                 | 2.8    | ns     |
|   |   |   | PSTIP2       | proline-serine-threonine phosphatase interacting protein 2                                     | ns                 | 2.8    | ns     |
|   |   |   | HSD17B1P1    | hydroxysteroid (17-beta) dehydrogenase 1 pseudogene 1                                          | ns                 | 2.8    | ns     |
|   |   |   | CRYBG2       | crystallin beta-gamma domain containing 2                                                      | ns                 | 2.8    | ns     |
|   |   |   | ADAM20       | ADAM metalloproteinase domain 20                                                               | ns                 | 2.8    | ns     |
|   |   |   | LOC105369468 | uncharacterized LOC105369468                                                                   | ns                 | 2.8    | ns     |
|   |   |   | RGPD1        | RANBP2-like and GRIP domain containing 1                                                       | ns                 | 2.8    | ns     |
|   |   |   | NDC80        | NDC80 kinetochore complex component                                                            | ns                 | 2.8    | ns     |
|   |   |   | LOC101929570 | uncharacterized LOC101929570                                                                   | ns                 | 2.8    | ns     |
|   |   |   | TTC7B        | tetratricopeptide repeat domain 7B                                                             | ns                 | 2.8    | ns     |
|   |   |   | LOC101928472 | uncharacterized LOC101928472                                                                   | ns                 | 2.8    | ns     |
|   |   |   | ALDH7A1      | aldehyde dehydrogenase 7 family, member A1                                                     | ns                 | 2.8    | ns     |
|   |   |   | LOC105374895 | uncharacterized LOC105374895                                                                   | ns                 | 2.8    | ns     |
|   |   |   | NEDD4        | neural precursor cell expressed, developmentally down-regulated 4, E3 ubiquitin protein ligase | ns                 | 2.8    | ns     |
|   |   |   | USP43        | ubiquitin specific peptidase 43                                                                | ns                 | 2.8    | ns     |
|   |   |   | EGFR         | epidermal growth factor receptor                                                               | ns                 | 2.8    | ns     |
|   |   |   | STARD4       | StAR-related lipid transfer domain containing 4                                                | ns                 | 2.8    | ns     |
|   |   |   | PIK3C2B      | phosphatidylinositol-4-phosphate 3-kinase, catalytic subunit type 2 beta                       | ns                 | 2.7    | ns     |
|   |   |   | RPS6KA6      | ribosomal protein S6 kinase, 90kDa, polypeptide 6                                              | ns                 | 2.7    | ns     |
|   |   |   | HERC2P4      | hect domain and RLD 2 pseudogene 4                                                             | ns                 | 2.7    | ns     |
|   |   |   | MRTFB        | myocardin related transcription factor B                                                       | ns                 | 2.7    | ns     |
|   |   |   | SHCBP1       | SHC SH2-domain binding protein 1                                                               | ns                 | 2.7    | ns     |
|   |   |   | NPIP11       | nuclear pore complex interacting protein family, member B11                                    | ns                 | 2.7    | ns     |
|   |   |   | BCORL1       | BCL6 corepressor-like 1                                                                        | ns                 | 2.7    | ns     |
|   |   |   | SPATA9       | spermatogenesis associated 9                                                                   | ns                 | 2.7    | ns     |
|   |   |   | RFX2         | regulatory factor X, 2 (influences HLA class II expression)                                    | ns                 | 2.7    | ns     |
|   |   |   | MARVELD3     | MARVEL domain containing 3                                                                     | ns                 | 2.7    | ns     |
|   |   |   | LOC101929461 | uncharacterized LOC101929461                                                                   | ns                 | 2.7    | ns     |
|   |   |   | PCAT19       | prostate cancer associated transcript 19 (non-protein coding)                                  | 2.7                | ns     | ns     |
|   |   |   | ALDH4A1      | aldehyde dehydrogenase 4 family, member A1                                                     | ns                 | 2.7    | ns     |
|   |   |   | NPIPA1       | nuclear pore complex interacting protein family member A1                                      | ns                 | 2.7    | ns     |
|   |   |   | LYPD5        | LY6                                                                                            | ns                 | 2.7    | ns     |
|   |   |   | TGM2         | transglutaminase 2                                                                             | 2.7                | ns     | ns     |
|   |   |   | OR6W1P       | olfactory receptor, family 6, subfamily W, member 1 pseudogene                                 | ns                 | 2.7    | ns     |
|   |   |   | DCAF1        | DDB1 and CUL4 associated factor 1                                                              | ns                 | 2.7    | ns     |
|   |   |   | GAP43        | growth associated protein 43                                                                   | ns                 | 2.7    | ns     |
|   |   |   | NAPB         | N-ethylmaleimide-sensitive factor attachment protein, beta                                     | ns                 | 2.7    | ns     |
|   |   |   | ARGLU1       | arginine and glutamate rich 1                                                                  | ns                 | 2.7    | ns     |
|   |   |   | CCL28        | chemokine (C-C motif) ligand 28                                                                | ns                 | 2.7    | ns     |
|   |   |   | LMO7         | LIM domain 7                                                                                   | ns                 | 2.7    | ns     |
|   |   |   | CAT          | catalase                                                                                       | 2.7                | ns     | ns     |



| S | C | E | Symbol       | Name                                                            | Linear Fold Change |        |        |
|---|---|---|--------------|-----------------------------------------------------------------|--------------------|--------|--------|
|   |   |   |              |                                                                 | S vs C             | S vs E | E vs C |
|   |   |   | SOS2         | SOS Ras                                                         | ns                 | 2.7    | ns     |
|   |   |   | ZNF443       | zinc finger protein 443                                         | ns                 | 2.7    | ns     |
|   |   |   | ZNRF3        | zinc and ring finger 3                                          | ns                 | 2.7    | ns     |
|   |   |   | ZNF525       | zinc finger protein 525                                         | ns                 | 2.7    | ns     |
|   |   |   | ECI2         | enoyl-CoA delta isomerase 2                                     | 2.7                | ns     | ns     |
|   |   |   | HYMAI        | hydatidiform mole associated and imprinted (non-protein coding) | ns                 | 2.6    | ns     |
|   |   |   | NEMP1        | nuclear envelope integral membrane protein 1                    | ns                 | 2.7    | ns     |
|   |   |   | RGPD3        | RANBP2-like and GRIP domain containing 3                        | ns                 | 2.6    | ns     |
|   |   |   | NPIP3        | nuclear pore complex interacting protein family, member B3      | ns                 | 2.6    | ns     |
|   |   |   | NPIP3        | nuclear pore complex interacting protein family, member B9      | ns                 | 2.6    | ns     |
|   |   |   | PCP4         | Purkinje cell protein 4                                         | ns                 | 2.6    | ns     |
|   |   |   | FILIP1       | filamin A interacting protein 1                                 | ns                 | 2.6    | ns     |
|   |   |   | ADAMTSL3     | ADAMTS like 3                                                   | ns                 | 2.6    | ns     |
|   |   |   | PEAK1        | pseudopodium-enriched atypical kinase 1                         | 2.6                | ns     | ns     |
|   |   |   | H2BC21       | H2B clustered histone 21                                        | ns                 | 2.6    | ns     |
|   |   |   | ATXN7        | ataxin 7                                                        | ns                 | 2.6    | ns     |
|   |   |   | PITX2        | paired-like homeodomain 2                                       | ns                 | 2.6    | ns     |
|   |   |   | IL36RN       | interleukin 36 receptor antagonist                              | ns                 | 2.6    | ns     |
|   |   |   | CPPED1       | calcineurin-like phosphoesterase domain containing 1            | ns                 | 2.6    | ns     |
|   |   |   | GRIK1        | glutamate receptor, ionotropic, kainate 1                       | ns                 | 2.6    | ns     |
|   |   |   | LARP4B       | La ribonucleoprotein domain family, member 4B                   | ns                 | 2.6    | ns     |
|   |   |   | LOC105379161 | uncharacterized LOC105379161                                    | ns                 | 2.6    | ns     |
|   |   |   | DLG1         | discs, large homolog 1 (Drosophila)                             | ns                 | 2.6    | ns     |
|   |   |   | NPIP5        | nuclear pore complex interacting protein family, member B5      | ns                 | 2.6    | ns     |
|   |   |   | RMI2         | RecQ mediated genome instability 2                              | ns                 | 2.6    | ns     |
|   |   |   | STEAP3       | STEAP family member 3, metalloredutase                          | ns                 | 2.6    | ns     |
|   |   |   | CCDC125      | coiled-coil domain containing 125                               | ns                 | 2.6    | ns     |
|   |   |   | PCP4L1       | Purkinje cell protein 4 like 1                                  | ns                 | 2.6    | ns     |
|   |   |   | TRIM33       | tripartite motif containing 33                                  | ns                 | 2.6    | ns     |
|   |   |   | MTMR1        | myotubularin related protein 1                                  | ns                 | 2.6    | ns     |
|   |   |   | RBM22        | RNA binding motif protein 22                                    | ns                 | 2.6    | ns     |
|   |   |   | PPP1R9A      | protein phosphatase 1, regulatory subunit 9A                    | ns                 | 2.6    | ns     |
|   |   |   | SIK3         | SIK family kinase 3                                             | ns                 | 2.6    | ns     |
|   |   |   | RASGRP3      | RAS guanyl releasing protein 3 (calcium and DAG-regulated)      | 2.6                | ns     | ns     |
|   |   |   | LINC00643    | long intergenic non-protein coding RNA 643                      | ns                 | 2.6    | ns     |
|   |   |   | TFDP2        | transcription factor Dp-2 (E2F dimerization partner 2)          | ns                 | 2.6    | ns     |
|   |   |   | RBL1         | retinoblastoma-like 1                                           | ns                 | 2.6    | ns     |
|   |   |   | KCNN4        | potassium channel, calcium activated intermediate               | ns                 | 2.6    | ns     |
|   |   |   | LOC105374155 | uncharacterized LOC105374155                                    | ns                 | 2.6    | ns     |
|   |   |   | ABCA5        | ATP binding cassette subfamily A member 5                       | ns                 | 2.6    | ns     |
|   |   |   | RBBP7        | retinoblastoma binding protein 7                                | ns                 | 2.6    | ns     |
|   |   |   | EFNB2        | ephrin-B2                                                       | 2.6                | ns     | ns     |
|   |   |   | LINC01061    | long intergenic non-protein coding RNA 1061                     | ns                 | 2.6    | ns     |
|   |   |   | SMAD7        | SMAD family member 7                                            | ns                 | 2.6    | ns     |
|   |   |   | LOC100288069 | uncharacterized LOC100288069                                    | ns                 | 2.5    | ns     |
|   |   |   | GPD1L        | glycerol-3-phosphate dehydrogenase 1-like                       | ns                 | 2.5    | ns     |
|   |   |   | FAR2         | fatty acyl-CoA reductase 2                                      | ns                 | 2.5    | ns     |
|   |   |   | KCTD3        | potassium channel tetramerization domain containing 3           | ns                 | 2.5    | ns     |
|   |   |   | ACBD6        | acyl-CoA binding domain containing 6                            | ns                 | 2.5    | ns     |
|   |   |   | SLAIN1       | SLAIN motif family member 1                                     | 2.5                | ns     | ns     |
|   |   |   | TRIM55       | tripartite motif containing 55                                  | ns                 | 2.5    | ns     |
|   |   |   | BAGE2        | B melanoma antigen family, member 2                             | ns                 | 2.5    | ns     |
|   |   |   | LOC100996442 | uncharacterized LOC100996442                                    | ns                 | 2.5    | ns     |
|   |   |   | MCUB         | mitochondrial calcium uniporter dominant negative subunit beta  | ns                 | 2.5    | ns     |
|   |   |   | UTRN         | utrophin                                                        | 2.5                | ns     | ns     |



| S | C | E | Symbol       | Name                                                                              | Linear Fold Change |        |        |
|---|---|---|--------------|-----------------------------------------------------------------------------------|--------------------|--------|--------|
|   |   |   |              |                                                                                   | S vs C             | S vs E | E vs C |
|   |   |   | RFTN2        | raftlin family member 2                                                           | 2.5                | ns     | ns     |
|   |   |   | MTM1         | myotubularin 1                                                                    | ns                 | 2.5    | ns     |
|   |   |   | ENOSF1       | enolase superfamily member 1                                                      | ns                 | 2.5    | ns     |
|   |   |   | TBC1D32      | TBC1 domain family, member 32                                                     | ns                 | 2.5    | ns     |
|   |   |   | KCTD4        | potassium channel tetramerization domain containing 4                             | ns                 | 2.5    | ns     |
|   |   |   | DIO3         | deiodinase, iodothyronine, type III                                               | ns                 | 2.5    | ns     |
|   |   |   | GAS2L3       | growth arrest-specific 2 like 3                                                   | ns                 | 2.5    | ns     |
|   |   |   | MCM3         | minichromosome maintenance complex component 3                                    | ns                 | 2.5    | ns     |
|   |   |   | DNMT3A       | DNA (cytosine-5-)-methyltransferase 3 alpha                                       | ns                 | 2.5    | ns     |
|   |   |   | RGPD4        | RANBP2-like and GRIP domain containing 4                                          | ns                 | 2.5    | ns     |
|   |   |   | FREM1        | FRAS1 related extracellular matrix 1                                              | ns                 | 2.5    | ns     |
|   |   |   | ZNF22-AS1    | ZNF22 antisense RNA 1                                                             | 2.5                | ns     | ns     |
|   |   |   | SPDYE2B      | speedy                                                                            | ns                 | 2.5    | ns     |
|   |   |   | TKT          | transketolase                                                                     | ns                 | 2.5    | ns     |
|   |   |   | YTHDC1       | YTH domain containing 1                                                           | ns                 | 2.5    | ns     |
|   |   |   | SLC2A11      | solute carrier family 2 (facilitated glucose transporter), member 11              | ns                 | 2.5    | ns     |
|   |   |   | SPDYE2       | speedy                                                                            | ns                 | 2.5    | ns     |
|   |   |   | GINS1        | GINS complex subunit 1 (Psf1 homolog)                                             | ns                 | 2.5    | ns     |
|   |   |   | LOC100506514 | uncharacterized LOC100506514                                                      | ns                 | 2.5    | ns     |
|   |   |   | CAVIN2       | caveolae associated protein 2                                                     | 2.5                | ns     | ns     |
|   |   |   | AMOTL1       | angiomin like 1                                                                   | ns                 | 2.5    | ns     |
|   |   |   | MDM4         | MDM4, p53 regulator                                                               | ns                 | 2.4    | ns     |
|   |   |   | SMS          | spermine synthase                                                                 | ns                 | 2.4    | ns     |
|   |   |   | SMG1P2       | SMG1 pseudogene 2                                                                 | ns                 | 2.4    | ns     |
|   |   |   | LARP1B       | La ribonucleoprotein domain family, member 1B                                     | ns                 | 2.4    | ns     |
|   |   |   | AKR1B1       | aldo-keto reductase family 1, member B1 (aldose reductase)                        | ns                 | 2.4    | ns     |
|   |   |   | SMG1P3       | SMG1 pseudogene 3                                                                 | ns                 | 2.4    | ns     |
|   |   |   | PAXBP1       | PAX3 and PAX7 binding protein 1                                                   | ns                 | 2.4    | ns     |
|   |   |   | LOC100128242 | uncharacterized LOC100128242                                                      | ns                 | 2.4    | ns     |
|   |   |   | PTPRK        | protein tyrosine phosphatase, receptor type, K                                    | ns                 | 2.4    | ns     |
|   |   |   | LOC401585    | uncharacterized LOC401585                                                         | ns                 | 2.4    | ns     |
|   |   |   | HMG2         | high mobility group nucleosomal binding domain 2                                  | ns                 | 2.4    | ns     |
|   |   |   | GLI3         | GLI family zinc finger 3                                                          | ns                 | 2.4    | ns     |
|   |   |   | TAF4B        | TAF4b RNA polymerase II, TATA box binding protein (TBP)-associated factor, 105kDa | ns                 | 2.4    | ns     |
|   |   |   | NR2F1-AS1    | NR2F1 antisense RNA 1                                                             | 2.4                | ns     | ns     |
|   |   |   | DIAPH2-AS1   | DIAPH2 antisense RNA 1                                                            | ns                 | 2.4    | ns     |
|   |   |   | TCAM1P       | testicular cell adhesion molecule 1, pseudogene                                   | ns                 | 2.4    | ns     |
|   |   |   | KCTD1        | potassium channel tetramerization domain containing 1                             | ns                 | 2.4    | ns     |
|   |   |   | EXTL2        | exostosin-like glycosyltransferase 2                                              | ns                 | 2.4    | ns     |
|   |   |   | LOC105379272 | putative ankyrin repeat domain-containing protein 20A12 pseudogene                | ns                 | 2.4    | ns     |
|   |   |   | KLHL5        | kelch-like family member 5                                                        | ns                 | 2.4    | ns     |
|   |   |   | HSPBAP1      | HSPB (heat shock 27kDa) associated protein 1                                      | ns                 | 2.4    | ns     |
|   |   |   | SNORD51      | small nucleolar RNA, C                                                            | ns                 | 2.4    | ns     |
|   |   |   | LOC113230    | uncharacterized protein LOC113230                                                 | ns                 | 2.4    | ns     |
|   |   |   | CBX5         | chromobox homolog 5                                                               | ns                 | 2.4    | ns     |
|   |   |   | LINC01004    | long intergenic non-protein coding RNA 1004                                       | ns                 | 2.4    | ns     |
|   |   |   | HEXIM1       | hexamethylene bis-acetamide inducible 1                                           | ns                 | 2.4    | ns     |
|   |   |   | C4orf19      | chromosome 4 open reading frame 19                                                | ns                 | 2.4    | ns     |
|   |   |   | ZNF507       | zinc finger protein 507                                                           | ns                 | 2.4    | ns     |
|   |   |   | ENTPD1       | ectonucleoside triphosphate diphosphohydrolase 1                                  | 2.4                | ns     | ns     |
|   |   |   | CENATAC      | centrosomal AT-AC splicing factor                                                 | ns                 | 2.4    | ns     |
|   |   |   | MYO9A        | myosin IXA                                                                        | ns                 | 2.4    | ns     |
|   |   |   | SPAG5        | sperm associated antigen 5                                                        | ns                 | 2.4    | ns     |
|   |   |   | HOPX         | HOP homeobox                                                                      | ns                 | 2.4    | ns     |
|   |   |   | STOM         | stomatin                                                                          | 2.4                | ns     | ns     |

| S | C | E | Symbol       | Name                                                                                  | Linear Fold Change |        |        |
|---|---|---|--------------|---------------------------------------------------------------------------------------|--------------------|--------|--------|
|   |   |   |              |                                                                                       | S vs C             | S vs E | E vs C |
|   |   |   | TBX4         | T-box 4                                                                               | ns                 | 2.4    | ns     |
|   |   |   | SPECC1L      | sperm antigen with calponin homology and coiled-coil domains 1-like                   | ns                 | 2.4    | ns     |
|   |   |   | MGST3        | microsomal glutathione S-transferase 3                                                | ns                 | 2.4    | ns     |
|   |   |   | LOC553103    | uncharacterized LOC553103                                                             | ns                 | 2.4    | ns     |
|   |   |   | LOC400655    | uncharacterized LOC400655                                                             | ns                 | 2.4    | ns     |
|   |   |   | FER1L4       | fer-1-like family member 4, pseudogene (functional)                                   | ns                 | 2.4    | ns     |
|   |   |   | MED13        | mediator complex subunit 13                                                           | ns                 | 2.4    | ns     |
|   |   |   | LOC105379520 | uncharacterized LOC105379520                                                          | ns                 | 2.4    | ns     |
|   |   |   | NRF1         | nuclear respiratory factor 1                                                          | ns                 | 2.4    | ns     |
|   |   |   | GCNT2        | glucosaminyl (N-acetyl) transferase 2, I-branching enzyme (I blood group)             | ns                 | 2.4    | ns     |
|   |   |   | MTMR7        | myotubularin related protein 7                                                        | ns                 | 2.4    | ns     |
|   |   |   | TLCD5        | TLC domain containing 5                                                               | ns                 | 2.4    | ns     |
|   |   |   | LOC101927391 | uncharacterized LOC101927391                                                          | ns                 | 2.4    | ns     |
|   |   |   | SIRPA        | signal-regulatory protein alpha                                                       | 2.4                | ns     | ns     |
|   |   |   | TP53TG3D     | TP53 target 3D                                                                        | ns                 | 2.4    | ns     |
|   |   |   | EXOC2        | exocyst complex component 2                                                           | ns                 | 2.4    | ns     |
|   |   |   | JAM3         | junctional adhesion molecule 3                                                        | ns                 | 2.4    | ns     |
|   |   |   | N4BP2        | NEDD4 binding protein 2                                                               | ns                 | 2.4    | ns     |
|   |   |   | RANBP17      | RAN binding protein 17                                                                | ns                 | 2.4    | ns     |
|   |   |   | CPEB4        | cytoplasmic polyadenylation element binding protein 4                                 | 2.4                | ns     | ns     |
|   |   |   | SMG1P5       | SMG1 pseudogene 5                                                                     | ns                 | 2.4    | ns     |
|   |   |   | MVB12B       | multivesicular body subunit 12B                                                       | ns                 | 2.4    | ns     |
|   |   |   | CEP68        | centrosomal protein 68kDa                                                             | ns                 | 2.4    | ns     |
|   |   |   | BAZ2B        | bromodomain adjacent to zinc finger domain 2B                                         | ns                 | 2.4    | ns     |
|   |   |   | AHCYL2       | adenosylhomocysteinase-like 2                                                         | ns                 | 2.4    | ns     |
|   |   |   | MFSD2A       | major facilitator superfamily domain containing 2A                                    | ns                 | 2.4    | ns     |
|   |   |   | FDFT1        | farnesyl-diphosphate farnesyltransferase 1                                            | ns                 | 2.3    | ns     |
|   |   |   | PLEKHA7      | pleckstrin homology domain containing, family A member 7                              | ns                 | 2.3    | ns     |
|   |   |   | GABARAPL1    | GABA(A) receptor-associated protein like 1                                            | ns                 | 2.3    | ns     |
|   |   |   | HID1         | HID1 domain containing                                                                | ns                 | 2.3    | ns     |
|   |   |   | DDB1         | damage-specific DNA binding protein 1                                                 | ns                 | 2.3    | ns     |
|   |   |   | FAM135A      | family with sequence similarity 135, member A                                         | 2.3                | ns     | ns     |
|   |   |   | TSL          | testis-expressed, seven-twelve, leukemia                                              | ns                 | 2.3    | ns     |
|   |   |   | PAK6         | p21 protein (Cdc42                                                                    | ns                 | 2.3    | ns     |
|   |   |   | ILDR1        | immunoglobulin-like domain containing receptor 1                                      | 2.3                | ns     | ns     |
|   |   |   | TMEM63A      | transmembrane protein 63A                                                             | ns                 | 2.3    | ns     |
|   |   |   | TULP4        | tubby like protein 4                                                                  | ns                 | 2.3    | ns     |
|   |   |   | YAP1         | Yes-associated protein 1                                                              | ns                 | 2.3    | ns     |
|   |   |   | BBOX1        | butyrobetaine (gamma), 2-oxoglutarate dioxygenase (gamma-butyrobetaine hydroxylase) 1 | ns                 | 2.3    | ns     |
|   |   |   | ZNF721       | zinc finger protein 721                                                               | ns                 | 2.3    | ns     |
|   |   |   | SH3D21       | SH3 domain containing 21                                                              | ns                 | 2.3    | ns     |
|   |   |   | CTHRC1       | collagen triple helix repeat containing 1                                             | ns                 | 2.3    | ns     |
|   |   |   | LPCAT3       | lysophosphatidylcholine acyltransferase 3                                             | ns                 | 2.3    | ns     |
|   |   |   | MIR548AL     | microRNA 548al                                                                        | ns                 | 2.3    | ns     |
|   |   |   | CENPU        | centromere protein U                                                                  | ns                 | 2.3    | ns     |
|   |   |   | LOC101059936 | uncharacterized LOC101059936                                                          | ns                 | 2.3    | ns     |
|   |   |   | LOC105374845 | uncharacterized LOC105374845                                                          | ns                 | 2.3    | ns     |
|   |   |   | ESRP2        | epithelial splicing regulatory protein 2                                              | ns                 | 2.3    | ns     |
|   |   |   | SPDYE16      | speedy                                                                                | ns                 | 2.3    | ns     |
|   |   |   | LENG8        | leukocyte receptor cluster (LRC) member 8                                             | ns                 | 2.3    | ns     |
|   |   |   | LOC100289230 | uncharacterized LOC100289230                                                          | ns                 | 2.3    | ns     |
|   |   |   | LINC01036    | long intergenic non-protein coding RNA 1036                                           | ns                 | 2.3    | ns     |
|   |   |   | TIGD2        | tigger transposable element derived 2                                                 | ns                 | 2.3    | ns     |
|   |   |   | BEX4         | brain expressed X-linked 4                                                            | ns                 | 2.3    | ns     |
|   |   |   | LSS          | lanosterol synthase (2,3-oxidosqualene-lanosterol cyclase)                            | 2.3                | ns     | ns     |

| S | C | E | Symbol       | Name                                                                 | Linear Fold Change |        |        |
|---|---|---|--------------|----------------------------------------------------------------------|--------------------|--------|--------|
|   |   |   |              |                                                                      | S vs C             | S vs E | E vs C |
|   |   |   | HP1BP3       | heterochromatin protein 1, binding protein 3                         | ns                 | 2.3    | ns     |
|   |   |   | KMT2C        | lysine (K)-specific methyltransferase 2C                             | ns                 | 2.3    | ns     |
|   |   |   | PITPNA       | phosphatidylinositol transfer protein, alpha                         | ns                 | 2.3    | ns     |
|   |   |   | NIN          | ninein (GSK3B interacting protein)                                   | ns                 | 2.3    | ns     |
|   |   |   | MCM9         | minichromosome maintenance 9 homologous recombination repair factor  | ns                 | 2.3    | ns     |
|   |   |   | DUS2         | dihydrouridine synthase 2                                            | ns                 | 2.3    | ns     |
|   |   |   | STARD13      | StAR-related lipid transfer domain containing 13                     | ns                 | 2.3    | ns     |
|   |   |   | FLVCR2       | feline leukemia virus subgroup C cellular receptor family, member 2  | ns                 | 2.3    | ns     |
|   |   |   | BRWD1        | bromodomain and WD repeat domain containing 1                        | ns                 | 2.3    | ns     |
|   |   |   | PMP22        | peripheral myelin protein 22                                         | 2.3                | ns     | ns     |
|   |   |   | RICTOR       | RPTOR independent companion of MTOR, complex 2                       | ns                 | 2.3    | ns     |
|   |   |   | WASH5P       | WAS protein family homolog 5 pseudogene                              | ns                 | 2.3    | ns     |
|   |   |   | MCM4         | minichromosome maintenance complex component 4                       | ns                 | 2.3    | ns     |
|   |   |   | SIAH2        | siah E3 ubiquitin protein ligase 2                                   | ns                 | 2.3    | ns     |
|   |   |   | LOC100506314 | uncharacterized LOC100506314                                         | ns                 | 2.3    | ns     |
|   |   |   | OMG          | oligodendrocyte myelin glycoprotein                                  | ns                 | 2.3    | ns     |
|   |   |   | NFAT5        | nuclear factor of activated T-cells 5, tonicity-responsive           | ns                 | 2.3    | ns     |
|   |   |   | ACER3        | alkaline ceramidase 3                                                | ns                 | 2.3    | ns     |
|   |   |   | BRAF         | B-Raf proto-oncogene, serine                                         | ns                 | 2.3    | ns     |
|   |   |   | GTF2IP4      | general transcription factor Iii, pseudogene 4                       | ns                 | 2.3    | ns     |
|   |   |   | TLK1         | tousled-like kinase 1                                                | ns                 | 2.3    | ns     |
|   |   |   | CSRP2        | cysteine and glycine-rich protein 2                                  | ns                 | 2.3    | ns     |
|   |   |   | PDE4DIP      | phosphodiesterase 4D interacting protein                             | ns                 | 2.2    | ns     |
|   |   |   | GTF2IP1      | general transcription factor Iii pseudogene 1                        | ns                 | 2.2    | ns     |
|   |   |   | HSPD1        | heat shock 60kDa protein 1 (chaperonin)                              | ns                 | 2.2    | ns     |
|   |   |   | RSKR         | ribosomal protein S6 kinase related                                  | ns                 | 2.2    | ns     |
|   |   |   | GDPD5        | glycerophosphodiester phosphodiesterase domain containing 5          | ns                 | 2.2    | ns     |
|   |   |   | PIR          | pirin                                                                | 2.2                | ns     | ns     |
|   |   |   | BLMH         | bleomycin hydrolase                                                  | ns                 | 2.2    | ns     |
|   |   |   | PTPN9        | protein tyrosine phosphatase, non-receptor type 9                    | 2.2                | ns     | ns     |
|   |   |   | WSB1         | WD repeat and SOCS box containing 1                                  | ns                 | 2.2    | ns     |
|   |   |   | STK3         | serine                                                               | ns                 | 2.2    | ns     |
|   |   |   | SIPA1L1      | signal-induced proliferation-associated 1 like 1                     | ns                 | 2.2    | ns     |
|   |   |   | LOC102723575 | uncharacterized LOC102723575                                         | ns                 | 2.2    | ns     |
|   |   |   | TMEM168      | transmembrane protein 168                                            | ns                 | 2.2    | ns     |
|   |   |   | LINC00885    | long intergenic non-protein coding RNA 885                           | ns                 | 2.2    | ns     |
|   |   |   | PELI1        | pellino E3 ubiquitin protein ligase 1                                | 2.2                | ns     | ns     |
|   |   |   | SLC35B4      | solute carrier family 35 (UDP-xylose                                 | ns                 | 2.2    | ns     |
|   |   |   | CPT2         | camitine palmitoyltransferase 2                                      | ns                 | 2.2    | ns     |
|   |   |   | MYORG        | myogenesis regulating glycosidase (putative)                         | ns                 | 2.2    | ns     |
|   |   |   | DIPK2A       | divergent protein kinase domain 2A                                   | ns                 | 2.2    | ns     |
|   |   |   | TMEM139      | transmembrane protein 139                                            | ns                 | 2.2    | ns     |
|   |   |   | ARL4A        | ADP-ribosylation factor like GTPase 4A                               | 2.2                | ns     | ns     |
|   |   |   | ABHD4        | abhydrolase domain containing 4                                      | 2.2                | ns     | ns     |
|   |   |   | GSR          | glutathione reductase                                                | 2.2                | ns     | ns     |
|   |   |   | CCDC171      | coiled-coil domain containing 171                                    | ns                 | 2.2    | ns     |
|   |   |   | SMARCA2      | SWI                                                                  | ns                 | 2.2    | ns     |
|   |   |   | LOC157860    | uncharacterized LOC157860                                            | ns                 | 2.2    | ns     |
|   |   |   | TOP1         | topoisomerase (DNA) I                                                | ns                 | 2.2    | ns     |
|   |   |   | LOC105374417 | uncharacterized LOC105374417                                         | ns                 | 2.2    | ns     |
|   |   |   | MCM7         | minichromosome maintenance complex component 7                       | ns                 | 2.2    | ns     |
|   |   |   | LOC105377601 | uncharacterized LOC105377601                                         | ns                 | 2.2    | ns     |
|   |   |   | ZNF468       | zinc finger protein 468                                              | ns                 | 2.2    | ns     |
|   |   |   | ASB4         | ankyrin repeat and SOCS box containing 4                             | ns                 | 2.2    | ns     |
|   |   |   | MAGI1        | membrane associated guanylate kinase, WW and PDZ domain containing 1 | 2.2                | ns     | ns     |

| S | C | E | Symbol       | Name                                                            | Linear Fold Change |        |        |
|---|---|---|--------------|-----------------------------------------------------------------|--------------------|--------|--------|
|   |   |   |              |                                                                 | S vs C             | S vs E | E vs C |
|   |   |   | EGFLAM       | EGF-like, fibronectin type III and laminin G domains            | 2.2                | ns     | ns     |
|   |   |   | COL28A1      | collagen, type XXVIII, alpha 1                                  | ns                 | 2.2    | ns     |
|   |   |   | HNRNPD       | heterogeneous nuclear ribonucleoprotein D                       | ns                 | 2.2    | ns     |
|   |   |   | TAPT1        | transmembrane anterior posterior transformation 1               | ns                 | 2.2    | ns     |
|   |   |   | OGDH         | oxoglutarate (alpha-ketoglutarate) dehydrogenase (lipoamide)    | ns                 | 2.2    | ns     |
|   |   |   | TCAF1        | TRPM8 channel-associated factor 1                               | 2.2                | ns     | ns     |
|   |   |   | LRATD1       | LRAT domain containing 1                                        | ns                 | 2.2    | ns     |
|   |   |   | NIBAN2       | niban apoptosis regulator 2                                     | ns                 | 2.2    | ns     |
|   |   |   | ACO1         | aconitase 1, soluble                                            | 2.2                | ns     | ns     |
|   |   |   | TEAD3        | TEA domain family member 3                                      | ns                 | 2.2    | ns     |
|   |   |   | ZNF587B      | zinc finger protein 587B                                        | ns                 | 2.2    | ns     |
|   |   |   | FUCA1        | fucosidase, alpha-L- 1, tissue                                  | 2.2                | ns     | ns     |
|   |   |   | SNRK         | SNF related kinase                                              | 2.2                | ns     | ns     |
|   |   |   | ERG          | v-ets avian erythroblastosis virus E26 oncogene homolog         | 2.2                | ns     | ns     |
|   |   |   | RDX          | radixin                                                         | ns                 | 2.2    | ns     |
|   |   |   | LOC105375137 | uncharacterized LOC105375137                                    | ns                 | 2.2    | ns     |
|   |   |   | HMGB2        | high mobility group box 2                                       | ns                 | 2.2    | ns     |
|   |   |   | SNX27        | sorting nexin family member 27                                  | ns                 | 2.2    | ns     |
|   |   |   | EMP2         | epithelial membrane protein 2                                   | 2.2                | ns     | ns     |
|   |   |   | TARID        | TCF21 antisense RNA inducing promoter demethylation             | ns                 | 2.2    | ns     |
|   |   |   | RMC1         | regulator of MON1-CCZ1                                          | ns                 | 2.2    | ns     |
|   |   |   | MXD1         | MAX dimerization protein 1                                      | ns                 | 2.2    | ns     |
|   |   |   | CCND2        | cyclin D2                                                       | 2.2                | ns     | ns     |
|   |   |   | LINC00894    | long intergenic non-protein coding RNA 894                      | ns                 | 2.2    | ns     |
|   |   |   | PSMD11       | proteasome 26S subunit, non-ATPase 11                           | ns                 | 2.2    | ns     |
|   |   |   | MIR551B      | microRNA 551b                                                   | ns                 | 2.2    | ns     |
|   |   |   | SLC40A1      | solute carrier family 40 (iron-regulated transporter), member 1 | 2.2                | ns     | ns     |
|   |   |   | ETFA         | electron-transfer-flavoprotein, alpha polypeptide               | ns                 | 2.2    | ns     |
|   |   |   | SCML1        | sex comb on midleg-like 1 (Drosophila)                          | 2.1                | ns     | ns     |
|   |   |   | SRSF4        | serine                                                          | ns                 | 2.1    | ns     |
|   |   |   | PRKG1        | protein kinase, cGMP-dependent, type I                          | 2.1                | ns     | ns     |
|   |   |   | NT5DC3       | 5-nucleotidase domain containing 3                              | ns                 | 2.1    | ns     |
|   |   |   | ANKRD10      | ankyrin repeat domain 10                                        | ns                 | 2.1    | ns     |
|   |   |   | SLC16A4      | solute carrier family 16, member 4                              | ns                 | 2.1    | ns     |
|   |   |   | LINC01347    | long intergenic non-protein coding RNA 1347                     | ns                 | 2.1    | ns     |
|   |   |   | ALAS1        | 5-aminolevulinic synthase 1                                     | ns                 | 2.1    | ns     |
|   |   |   | AAK1         | AP2 associated kinase 1                                         | ns                 | 2.1    | ns     |
|   |   |   | NOX5         | NADPH oxidase, EF-hand calcium binding domain 5                 | ns                 | 2.1    | ns     |
|   |   |   | CNOT6L       | CCR4-NOT transcription complex subunit 6-like                   | ns                 | 2.1    | ns     |
|   |   |   | SETD5        | SET domain containing 5                                         | ns                 | 2.1    | ns     |
|   |   |   | LOC100132287 | uncharacterized LOC100132287                                    | ns                 | 2.1    | ns     |
|   |   |   | PDE4B        | phosphodiesterase 4B, cAMP-specific                             | 2.1                | ns     | ns     |
|   |   |   | HES1         | hes family bHLH transcription factor 1                          | ns                 | 2.1    | ns     |
|   |   |   | NUDT3        | nudix hydrolase 3                                               | 2.1                | ns     | ns     |
|   |   |   | AMBRA1       | autophagy                                                       | ns                 | 2.1    | ns     |
|   |   |   | TAS2R60      | taste receptor, type 2, member 60                               | ns                 | 2.1    | ns     |
|   |   |   | TGFBR3       | transforming growth factor beta receptor III                    | ns                 | 2.1    | ns     |
|   |   |   | C1QTNF1-AS1  | C1QTNF1 antisense RNA 1                                         | ns                 | 2.1    | ns     |
|   |   |   | GRAMD2B      | GRAM domain containing 2B                                       | ns                 | 2.1    | ns     |
|   |   |   | FXN          | frataxin                                                        | 2.1                | ns     | ns     |
|   |   |   | DEDD         | death effector domain containing                                | ns                 | 2.1    | ns     |
|   |   |   | AGAP1        | ArfGAP with GTPase domain, ankyrin repeat and PH domain 1       | ns                 | 2.1    | ns     |
|   |   |   | ZNF552       | zinc finger protein 552                                         | ns                 | 2.1    | ns     |
|   |   |   | MAP3K20      | mitogen-activated protein kinase kinase kinase 20               | 2.1                | ns     | ns     |
|   |   |   | FAM151B      | family with sequence similarity 151, member B                   | ns                 | 2.1    | ns     |



| S | C | E | Symbol       | Name                                                                                         | Linear Fold Change |        |        |
|---|---|---|--------------|----------------------------------------------------------------------------------------------|--------------------|--------|--------|
|   |   |   |              |                                                                                              | S vs C             | S vs E | E vs C |
|   |   |   | KLHL42       | kelch-like family member 42                                                                  | ns                 | 2.1    | ns     |
|   |   |   | NASP         | nuclear autoantigenic sperm protein (histone-binding)                                        | ns                 | 2.1    | ns     |
|   |   |   | CBWD5        | COBW domain containing 5                                                                     | ns                 | 2.1    | ns     |
|   |   |   | CPT1A        | camitine palmitoyltransferase 1A (liver)                                                     | 2.1                | ns     | ns     |
|   |   |   | PTPN1        | protein tyrosine phosphatase, non-receptor type 1                                            | 2.1                | ns     | ns     |
|   |   |   | VSTM4        | V-set and transmembrane domain containing 4                                                  | 2.1                | ns     | ns     |
|   |   |   | EPB41L3      | erythrocyte membrane protein band 4.1-like 3                                                 | 2.1                | ns     | ns     |
|   |   |   | MAP4K3       | mitogen-activated protein kinase kinase kinase kinase 3                                      | ns                 | 2.1    | ns     |
|   |   |   | SQSTM1       | sequestosome 1                                                                               | ns                 | 2.1    | ns     |
|   |   |   | MYO5B        | myosin VB                                                                                    | ns                 | 2.1    | ns     |
|   |   |   | TRA2B        | transformer 2 beta homolog (Drosophila)                                                      | ns                 | 2.1    | ns     |
|   |   |   | PSD3         | pleckstrin and Sec7 domain containing 3                                                      | 2.1                | ns     | ns     |
|   |   |   | LOC100506504 | uncharacterized LOC100506504                                                                 | ns                 | 2.1    | ns     |
|   |   |   | LRRC42       | leucine rich repeat containing 42                                                            | ns                 | 2.1    | ns     |
|   |   |   | NSG1         | neuron specific gene family member 1                                                         | ns                 | 2.1    | ns     |
|   |   |   | PGAP2        | post-GPI attachment to proteins 2                                                            | ns                 | 2.1    | ns     |
|   |   |   | NPIPA5       | nuclear pore complex interacting protein family, member A5                                   | ns                 | 2.1    | ns     |
|   |   |   | MARVELD2     | MARVEL domain containing 2                                                                   | ns                 | 2.1    | ns     |
|   |   |   | NUP58        | nucleoporin 58kDa                                                                            | ns                 | 2.1    | ns     |
|   |   |   | HNRNPH1      | heterogeneous nuclear ribonucleoprotein H1 (H)                                               | ns                 | 2.1    | ns     |
|   |   |   | MCM8         | minichromosome maintenance 8 homologous recombination repair factor                          | ns                 | 2.1    | ns     |
|   |   |   | PCDH1        | protocadherin 1                                                                              | ns                 | 2.1    | ns     |
|   |   |   | SLC19A1      | solute carrier family 19 (folate transporter), member 1                                      | ns                 | 2.1    | ns     |
|   |   |   | C1orf21      | chromosome 1 open reading frame 21                                                           | ns                 | 2.1    | ns     |
|   |   |   | EPS8L1       | EPS8-like 1                                                                                  | ns                 | 2.1    | ns     |
|   |   |   | CHD2         | chromodomain helicase DNA binding protein 2                                                  | ns                 | 2.1    | ns     |
|   |   |   | HMGN1        | high mobility group nucleosome binding domain 1                                              | ns                 | 2.1    | ns     |
|   |   |   | LCOR         | ligand dependent nuclear receptor corepressor                                                | ns                 | 2.1    | ns     |
|   |   |   | NF1          | neurofibromin 1                                                                              | ns                 | 2.1    | ns     |
|   |   |   | STRA6        | stimulated by retinoic acid 6                                                                | ns                 | 2.1    | ns     |
|   |   |   | HMGCS2       | 3-hydroxy-3-methylglutaryl-CoA synthase 2 (mitochondrial)                                    | ns                 | 2.1    | ns     |
|   |   |   | FGFR2        | fibroblast growth factor receptor 2                                                          | ns                 | 2.1    | ns     |
|   |   |   | KIRREL1      | kirre like nephrin family adhesion molecule 1                                                | 2.1                | ns     | ns     |
|   |   |   | MED12        | mediator complex subunit 12                                                                  | ns                 | 2.1    | ns     |
|   |   |   | ANKRD44-IT1  | ANKRD44 intronic transcript 1                                                                | 2.1                | ns     | ns     |
|   |   |   | LOC105376363 | uncharacterized LOC105376363                                                                 | ns                 | 2.1    | ns     |
|   |   |   | NXF1         | nuclear RNA export factor 1                                                                  | ns                 | 2.0    | ns     |
|   |   |   | TNPO1        | transportin 1                                                                                | ns                 | 2.0    | ns     |
|   |   |   | LRP5         | LDL receptor related protein 5                                                               | ns                 | 2.0    | ns     |
|   |   |   | TCTEX1D4     | Tctex1 domain containing 4                                                                   | ns                 | 2.0    | ns     |
|   |   |   | FAN1         | FANCD2                                                                                       | ns                 | 2.0    | ns     |
|   |   |   | LOC100288911 | uncharacterized LOC100288911                                                                 | ns                 | 2.0    | ns     |
|   |   |   | ABI2         | abl-interactor 2                                                                             | 2.0                | ns     | ns     |
|   |   |   | MANSC1       | MANSC domain containing 1                                                                    | 2.0                | ns     | ns     |
|   |   |   | HPDL         | 4-hydroxyphenylpyruvate dioxygenase-like                                                     | ns                 | 2.0    | ns     |
|   |   |   | APBB2        | amyloid beta (A4) precursor protein-binding, family B, member 2                              | 2.0                | ns     | ns     |
|   |   |   | PLEKHA8      | pleckstrin homology domain containing, family A (phosphoinositide binding specific) member 8 | ns                 | 2.0    | ns     |
|   |   |   | SCARNA7      | small Cajal body-specific RNA 7                                                              | ns                 | 2.0    | ns     |
|   |   |   | EP300-AS1    | EP300 antisense RNA 1                                                                        | ns                 | 2.0    | ns     |
|   |   |   | RASAL2       | RAS protein activator like 2                                                                 | ns                 | 2.0    | ns     |
|   |   |   | HMGA1        | high mobility group AT-hook 1                                                                | ns                 | 2.0    | ns     |
|   |   |   | NPIPA7       | nuclear pore complex interacting protein family, member A7                                   | ns                 | 2.0    | ns     |
|   |   |   | ARID2        | AT rich interactive domain 2 (ARID, RFX-like)                                                | ns                 | 2.0    | ns     |
|   |   |   | RBM39        | RNA binding motif protein 39                                                                 | ns                 | 2.0    | ns     |
|   |   |   | SFPQ         | splicing factor proline                                                                      | ns                 | 2.0    | ns     |

| S | C | E | Symbol       | Name                                                                      | Linear Fold Change |        |        |
|---|---|---|--------------|---------------------------------------------------------------------------|--------------------|--------|--------|
|   |   |   |              |                                                                           | S vs C             | S vs E | E vs C |
|   |   |   | LYPD6        | LY6                                                                       | 2.0                | ns     | ns     |
|   |   |   | EXOC6B       | exocyst complex component 6B                                              | ns                 | 2.0    | ns     |
|   |   |   | DLG3         | discs, large homolog 3 (Drosophila)                                       | ns                 | 2.0    | ns     |
|   |   |   | NEB          | nebulin                                                                   | ns                 | 2.0    | ns     |
|   |   |   | AGFG1        | ArfGAP with FG repeats 1                                                  | ns                 | 2.0    | ns     |
|   |   |   | MOCS2        | molybdenum cofactor synthesis 2                                           | 2.0                | ns     | ns     |
|   |   |   | CASP3        | caspase 3                                                                 | ns                 | 2.0    | ns     |
|   |   |   | LOC105370489 | uncharacterized LOC105370489                                              | ns                 | 2.0    | ns     |
|   |   |   | KPNA2        | karyopherin alpha 2 (RAG cohort 1, importin alpha 1)                      | ns                 | 2.0    | ns     |
|   |   |   | HFE          | hemochromatosis                                                           | 2.0                | ns     | ns     |
|   |   |   | CSTF2        | cleavage stimulation factor, 3 pre-RNA, subunit 2                         | ns                 | 2.0    | ns     |
|   |   |   | LEP          | leptin                                                                    | -19.5              | ns     | ns     |
|   |   |   | OR5P2        | olfactory receptor, family 5, subfamily P, member 2                       | ns                 | ns     | -16.6  |
|   |   |   | LOC105375837 | uncharacterized LOC105375837                                              | -12.4              | ns     | ns     |
|   |   |   | LOC283299    | uncharacterized LOC283299                                                 | ns                 | ns     | -7.0   |
|   |   |   | UCA1         | urothelial cancer associated 1 (non-protein coding)                       | -6.4               | ns     | ns     |
|   |   |   | LAMB4        | laminin, beta 4                                                           | ns                 | ns     | -6.4   |
|   |   |   | AADACL2-AS1  | AADACL2 antisense RNA 1                                                   | ns                 | ns     | -5.8   |
|   |   |   | ZFP42        | ZFP42 zinc finger protein                                                 | -5.5               | ns     | ns     |
|   |   |   | SLC17A8      | solute carrier family 17 (vesicular glutamate transporter), member 8      | -5.5               | ns     | ns     |
|   |   |   | CA2          | carbonic anhydrase II                                                     | -5.4               | ns     | ns     |
|   |   |   | PPP4R4       | protein phosphatase 4, regulatory subunit 4                               | -5.0               | ns     | ns     |
|   |   |   | DOCK5        | dedicator of cytokinesis 5                                                | -5.0               | ns     | ns     |
|   |   |   | ZNF300P1     | zinc finger protein 300 pseudogene 1 (functional)                         | -4.9               | ns     | ns     |
|   |   |   | LOC105370445 | uncharacterized LOC105370445                                              | -4.7               | ns     | ns     |
|   |   |   | PLPP2        | phospholipid phosphatase 2                                                | -4.7               | ns     | ns     |
|   |   |   | ARSK         | arylsulfatase family, member K                                            | -4.5               | ns     | ns     |
|   |   |   | CNTNAP3      | contactin associated protein-like 3                                       | -4.4               | ns     | ns     |
|   |   |   | FOS          | FBJ murine osteosarcoma viral oncogene homolog                            | -4.3               | ns     | ns     |
|   |   |   | LOC101927857 | uncharacterized LOC101927857                                              | ns                 | ns     | -4.3   |
|   |   |   | LOC102724484 | uncharacterized LOC102724484                                              | ns                 | ns     | -4.2   |
|   |   |   | LY6E         | lymphocyte antigen 6 complex, locus E                                     | -4.1               | ns     | ns     |
|   |   |   | LOC100128979 | uncharacterized LOC100128979                                              | -4.0               | ns     | ns     |
|   |   |   | HRAT17       | heart tissue-associated transcript 17                                     | -4.0               | ns     | ns     |
|   |   |   | SFRP1        | secreted frizzled-related protein 1                                       | -4.0               | ns     | ns     |
|   |   |   | BHLHE40      | basic helix-loop-helix family, member e40                                 | -4.0               | ns     | ns     |
|   |   |   | TTK          | TTK protein kinase                                                        | ns                 | ns     | -3.9   |
|   |   |   | NUAK2        | NUAK family, SNF1-like kinase, 2                                          | -3.9               | ns     | ns     |
|   |   |   | BAIAP2L1     | BAI1-associated protein 2-like 1                                          | -3.8               | ns     | ns     |
|   |   |   | LOC105372290 | uncharacterized LOC105372290                                              | -3.8               | ns     | ns     |
|   |   |   | OR5E1P       | olfactory receptor, family 5, subfamily E, member 1 pseudogene            | ns                 | ns     | -3.7   |
|   |   |   | PRSS8        | protease, serine, 8                                                       | -3.7               | ns     | ns     |
|   |   |   | HCAR3        | hydroxycarboxylic acid receptor 3                                         | -3.7               | ns     | ns     |
|   |   |   | SNORA3B      | small nucleolar RNA, H                                                    | ns                 | ns     | -3.7   |
|   |   |   | LINC00294    | long intergenic non-protein coding RNA 294                                | -3.7               | ns     | ns     |
|   |   |   | EGLN3        | egl-9 family hypoxia-inducible factor 3                                   | -3.7               | ns     | ns     |
|   |   |   | PGPEP1       | pyroglutamyl-peptidase I                                                  | -3.6               | ns     | ns     |
|   |   |   | SASH1        | SAM and SH3 domain containing 1                                           | -3.6               | ns     | ns     |
|   |   |   | TET3         | tet methylcytosine dioxygenase 3                                          | -3.6               | ns     | ns     |
|   |   |   | SLC35A3      | solute carrier family 35 (UDP-N-acetylglucosamine transporter), member A3 | -3.5               | ns     | ns     |
|   |   |   | LINC00842    | long intergenic non-protein coding RNA 842                                | -3.5               | ns     | ns     |
|   |   |   | LOC102723446 | uncharacterized LOC102723446                                              | -3.5               | ns     | ns     |
|   |   |   | F11R         | F11 receptor                                                              | -3.5               | ns     | ns     |
|   |   |   | NOS2         | nitric oxide synthase 2, inducible                                        | -3.5               | ns     | ns     |
|   |   |   | COL21A1      | collagen, type XXI, alpha 1                                               | ns                 | ns     | -3.5   |

| S | C | E | Symbol       | Name                                                                                         | Linear Fold Change |        |        |
|---|---|---|--------------|----------------------------------------------------------------------------------------------|--------------------|--------|--------|
|   |   |   |              |                                                                                              | S vs C             | S vs E | E vs C |
|   |   |   | ACKR2        | atypical chemokine receptor 2                                                                | ns                 | ns     | -3.5   |
|   |   |   | SLC7A1       | solute carrier family 7 (cationic amino acid transporter, y+ system), member 1               | -3.4               | ns     | ns     |
|   |   |   | LOC105379109 | uncharacterized LOC105379109                                                                 | ns                 | ns     | -3.4   |
|   |   |   | MIG7         | mig-7                                                                                        | ns                 | ns     | -3.4   |
|   |   |   | TGFB1        | transforming growth factor beta 1                                                            | -3.4               | ns     | ns     |
|   |   |   | ANKRD50      | ankyrin repeat domain 50                                                                     | -3.3               | ns     | ns     |
|   |   |   | DDX60L       | DEAD (Asp-Glu-Ala-Asp) box polypeptide 60-like                                               | -3.3               | ns     | ns     |
|   |   |   | FLT1         | fms-related tyrosine kinase 1                                                                | -3.3               | ns     | ns     |
|   |   |   | ZNF726       | zinc finger protein 726                                                                      | ns                 | ns     | -3.3   |
|   |   |   | ADGRL3       | adhesion G protein-coupled receptor L3                                                       | ns                 | ns     | -3.3   |
|   |   |   | LOC101927087 | uncharacterized LOC101927087                                                                 | -3.3               | ns     | ns     |
|   |   |   | PLEKHA2      | pleckstrin homology domain containing, family A (phosphoinositide binding specific) member 2 | -3.2               | ns     | ns     |
|   |   |   | MAN2A1       | mannosidase, alpha, class 2A, member 1                                                       | -3.2               | ns     | ns     |
|   |   |   | BIRC7        | baculoviral IAP repeat containing 7                                                          | -3.2               | ns     | ns     |
|   |   |   | DSC2         | desmocollin 2                                                                                | ns                 | ns     | -3.2   |
|   |   |   | SLC1A6       | solute carrier family 1 (high affinity aspartate                                             | -3.1               | ns     | ns     |
|   |   |   | CYP8B1       | cytochrome P450, family 8, subfamily B, polypeptide 1                                        | ns                 | ns     | -3.1   |
|   |   |   | IGLJ2        | immunoglobulin lambda joining 2                                                              | ns                 | ns     | -3.1   |
|   |   |   | RUSC2        | RUN and SH3 domain containing 2                                                              | -3.1               | ns     | ns     |
|   |   |   | GJA5         | gap junction protein alpha 5                                                                 | -3.1               | ns     | ns     |
|   |   |   | LOC101928955 | uncharacterized LOC101928955                                                                 | -3.0               | ns     | ns     |
|   |   |   | FBXO46       | F-box protein 46                                                                             | -3.0               | ns     | ns     |
|   |   |   | LOC105376713 | uncharacterized LOC105376713                                                                 | ns                 | ns     | -3.0   |
|   |   |   | PANX1        | pannexin 1                                                                                   | -3.0               | ns     | ns     |
|   |   |   | TEAD1        | TEA domain family member 1 (SV40 transcriptional enhancer factor)                            | -3.0               | ns     | ns     |
|   |   |   | ELF4         | E74-like factor 4 (ets domain transcription factor)                                          | -2.9               | ns     | ns     |
|   |   |   | POTEG        | POTE ankyrin domain family, member G                                                         | -2.9               | ns     | ns     |
|   |   |   | PFKP         | phosphofructokinase, platelet                                                                | -2.9               | ns     | ns     |
|   |   |   | SH3BP5       | SH3-domain binding protein 5 (BTK-associated)                                                | -2.9               | ns     | ns     |
|   |   |   | SLC6A8       | solute carrier family 6 (neurotransmitter transporter), member 8                             | -2.9               | ns     | ns     |
|   |   |   | TCP11L1      | t-complex 11, testis-specific-like 1                                                         | -2.9               | ns     | ns     |
|   |   |   | C18orf54     | chromosome 18 open reading frame 54                                                          | ns                 | ns     | -2.9   |
|   |   |   | TCEA3        | transcription elongation factor A (SII), 3                                                   | -2.9               | ns     | ns     |
|   |   |   | SFN          | stratifin                                                                                    | -2.9               | ns     | ns     |
|   |   |   | SUGCT        | succinyl-CoA:glutarate-CoA transferase                                                       | -2.9               | ns     | ns     |
|   |   |   | LOC101929140 | uncharacterized LOC101929140                                                                 | -2.9               | ns     | ns     |
|   |   |   | SLC44A5      | solute carrier family 44, member 5                                                           | ns                 | ns     | -2.9   |
|   |   |   | RAB25        | RAB25, member RAS oncogene family                                                            | ns                 | ns     | -2.9   |
|   |   |   | TANC2        | tetratricopeptide repeat, ankyrin repeat and coiled-coil containing 2                        | -2.9               | ns     | ns     |
|   |   |   | SLC7A4       | solute carrier family 7, member 4                                                            | ns                 | ns     | -2.9   |
|   |   |   | BMT2         | base methyltransferase of 25S rRNA 2 homolog                                                 | -2.8               | ns     | ns     |
|   |   |   | IPMK         | inositol polyphosphate multikinase                                                           | -2.8               | ns     | ns     |
|   |   |   | KIF21A       | kinesin family member 21A                                                                    | -2.8               | ns     | ns     |
|   |   |   | TSC22D1      | TSC22 domain family, member 1                                                                | -2.8               | ns     | ns     |
|   |   |   | DSP          | desmoplakin                                                                                  | ns                 | ns     | -2.8   |
|   |   |   | CORO2A       | coronin, actin binding protein, 2A                                                           | -2.8               | ns     | ns     |
|   |   |   | BRIP1        | BRCA1 interacting protein C-terminal helicase 1                                              | ns                 | ns     | -2.8   |
|   |   |   | SH3PXD2A     | SH3 and PX domains 2A                                                                        | -2.8               | ns     | ns     |
|   |   |   | HYAL4        | hyaluronoglucosaminidase 4                                                                   | ns                 | ns     | -2.8   |
|   |   |   | LOC105378488 | uncharacterized LOC105378488                                                                 | -2.8               | ns     | ns     |
|   |   |   | TAF5L        | TAF5-like RNA polymerase II, p300                                                            | -2.7               | ns     | ns     |
|   |   |   | LOC105376268 | uncharacterized LOC105376268                                                                 | -2.7               | ns     | ns     |
|   |   |   | DSCR4        | Down syndrome critical region 4                                                              | ns                 | ns     | -2.7   |
|   |   |   | ERO1A        | endoplasmic reticulum oxidoreductase alpha                                                   | -2.7               | ns     | ns     |
|   |   |   | SKIL         | SKI-like proto-oncogene                                                                      | -2.7               | ns     | ns     |

| S | C | E | Symbol       | Name                                                                          | Linear Fold Change |        |        |
|---|---|---|--------------|-------------------------------------------------------------------------------|--------------------|--------|--------|
|   |   |   |              |                                                                               | S vs C             | S vs E | E vs C |
|   |   |   | LOC100505918 | uncharacterized LOC100505918                                                  | ns                 | ns     | -2.7   |
|   |   |   | LOC105370960 | uncharacterized LOC105370960                                                  | ns                 | ns     | -2.7   |
|   |   |   | COL4A1       | collagen, type IV, alpha 1                                                    | -2.7               | ns     | ns     |
|   |   |   | CDK7         | cyclin-dependent kinase 7                                                     | -2.7               | ns     | ns     |
|   |   |   | LOC101927585 | uncharacterized LOC101927585                                                  | ns                 | ns     | -2.7   |
|   |   |   | SUCNR1       | succinate receptor 1                                                          | ns                 | ns     | -2.7   |
|   |   |   | LYPD3        | LY6                                                                           | ns                 | ns     | -2.7   |
|   |   |   | LOC105376938 | uncharacterized LOC105376938                                                  | -2.7               | ns     | ns     |
|   |   |   | LOC285500    | uncharacterized LOC285500                                                     | ns                 | ns     | -2.7   |
|   |   |   | BRCA2        | breast cancer 2, early onset                                                  | ns                 | ns     | -2.7   |
|   |   |   | SOWAHD       | sosondowah ankyrin repeat domain family member D                              | -2.6               | ns     | ns     |
|   |   |   | DFFB         | DNA fragmentation factor, 40kDa, beta polypeptide (caspase-activated DNase)   | -2.6               | ns     | ns     |
|   |   |   | MME          | membrane metallo-endopeptidase                                                | ns                 | ns     | -2.6   |
|   |   |   | LOC102723985 | uncharacterized LOC102723985                                                  | ns                 | ns     | -2.6   |
|   |   |   | ZNF90        | zinc finger protein 90                                                        | ns                 | ns     | -2.6   |
|   |   |   | MFAP2        | microfibrillar associated protein 2                                           | -2.6               | ns     | ns     |
|   |   |   | MBNL2        | muscleblind-like splicing regulator 2                                         | -2.6               | ns     | ns     |
|   |   |   | LOC101927027 | uncharacterized LOC101927027                                                  | -2.6               | ns     | ns     |
|   |   |   | PRKD3        | protein kinase D3                                                             | -2.6               | ns     | ns     |
|   |   |   | SLC1A3       | solute carrier family 1 (glial high affinity glutamate transporter), member 3 | -2.6               | ns     | ns     |
|   |   |   | VAV2         | vav 2 guanine nucleotide exchange factor                                      | -2.6               | ns     | ns     |
|   |   |   | MOB3A        | MOB kinase activator 3A                                                       | -2.5               | ns     | ns     |
|   |   |   | OVOL1        | ovo-like zinc finger 1                                                        | ns                 | ns     | -2.5   |
|   |   |   | ARHGAP24     | Rho GTPase activating protein 24                                              | ns                 | ns     | -2.5   |
|   |   |   | COL4A2       | collagen, type IV, alpha 2                                                    | -2.5               | ns     | ns     |
|   |   |   | GPX3         | glutathione peroxidase 3                                                      | -2.5               | ns     | ns     |
|   |   |   | ZNF662       | zinc finger protein 662                                                       | ns                 | ns     | -2.5   |
|   |   |   | PRKAB2       | protein kinase, AMP-activated, beta 2 non-catalytic subunit                   | -2.5               | ns     | ns     |
|   |   |   | PROSER2-AS1  | PROSER2 antisense RNA 1                                                       | -2.5               | ns     | ns     |
|   |   |   | ZNF100       | zinc finger protein 100                                                       | -2.5               | ns     | ns     |
|   |   |   | MFAP5        | microfibrillar associated protein 5                                           | -2.5               | ns     | ns     |
|   |   |   | PLIN2        | perilipin 2                                                                   | ns                 | ns     | -2.5   |
|   |   |   | SLC10A7      | solute carrier family 10, member 7                                            | -2.5               | ns     | ns     |
|   |   |   | SOWAHC       | sosondowah ankyrin repeat domain family member C                              | -2.5               | ns     | ns     |
|   |   |   | HYI          | hydroxypyruvate isomerase (putative)                                          | -2.5               | ns     | ns     |
|   |   |   | PLAAT3       | phospholipase A and acyltransferase 3                                         | -2.4               | ns     | ns     |
|   |   |   | HMG3-AS1     | HMG3 antisense RNA 1                                                          | ns                 | ns     | -2.4   |
|   |   |   | PLCL2        | phospholipase C-like 2                                                        | ns                 | ns     | -2.4   |
|   |   |   | SH3BP5-AS1   | SH3BP5 antisense RNA 1                                                        | -2.4               | ns     | ns     |
|   |   |   | JPT2         | Jupiter microtubule associated homolog 2                                      | -2.4               | ns     | ns     |
|   |   |   | AP3S1        | adaptor-related protein complex 3, sigma 1 subunit                            | -2.4               | ns     | ns     |
|   |   |   | CHRD2        | chordin-like 2                                                                | -2.4               | ns     | ns     |
|   |   |   | SCAMP1       | secretory carrier membrane protein 1                                          | -2.4               | ns     | ns     |
|   |   |   | TK1          | thymidine kinase 1, soluble                                                   | ns                 | ns     | -2.4   |
|   |   |   | CCSER1       | coiled-coil serine rich protein 1                                             | ns                 | ns     | -2.4   |
|   |   |   | NDST1        | N-deacetylase                                                                 | -2.4               | ns     | ns     |
|   |   |   | PTH1R        | parathyroid hormone 1 receptor                                                | -2.4               | ns     | ns     |
|   |   |   | ACTA1        | actin, alpha 1, skeletal muscle                                               | -2.4               | ns     | ns     |
|   |   |   | PPP1R1C      | protein phosphatase 1, regulatory (inhibitor) subunit 1C                      | -2.4               | ns     | ns     |
|   |   |   | ZBTB2        | zinc finger and BTB domain containing 2                                       | -2.4               | ns     | ns     |
|   |   |   | TLE1         | transducin-like enhancer of split 1 (E(sp1) homolog, Drosophila)              | ns                 | ns     | -2.4   |
|   |   |   | CCNG2        | cyclin G2                                                                     | -2.4               | ns     | ns     |
|   |   |   | PARP14       | poly(ADP-ribose) polymerase family member 14                                  | -2.4               | ns     | ns     |
|   |   |   | SLC27A6      | solute carrier family 27 (fatty acid transporter), member 6                   | ns                 | ns     | -2.4   |
|   |   |   | B3GNT7       | UDP-GlcNAc:betaGal beta-1,3-N-acetylglucosaminyltransferase 7                 | -2.3               | ns     | ns     |



| S | C | E | Symbol       | Name                                                                      | Linear Fold Change |        |        |
|---|---|---|--------------|---------------------------------------------------------------------------|--------------------|--------|--------|
|   |   |   |              |                                                                           | S vs C             | S vs E | E vs C |
|   |   |   | PHKA2        | phosphorylase kinase, alpha 2 (liver)                                     | ns                 | ns     | -2.3   |
|   |   |   | ZNF93        | zinc finger protein 93                                                    | ns                 | ns     | -2.3   |
|   |   |   | CDKN1C       | cyclin-dependent kinase inhibitor 1C (p57, Kip2)                          | -2.3               | ns     | ns     |
|   |   |   | IGF2BP2      | insulin-like growth factor 2 mRNA binding protein 2                       | ns                 | ns     | -2.3   |
|   |   |   | GPR146       | G protein-coupled receptor 146                                            | -2.3               | ns     | ns     |
|   |   |   | PLEKHA5      | pleckstrin homology domain containing, family A member 5                  | ns                 | ns     | -2.3   |
|   |   |   | LMNB1        | lamin B1                                                                  | ns                 | ns     | -2.3   |
|   |   |   | BIRC5        | baculoviral IAP repeat containing 5                                       | ns                 | ns     | -2.3   |
|   |   |   | BZW2         | basic leucine zipper and W2 domains 2                                     | ns                 | ns     | -2.3   |
|   |   |   | MARVELD1     | MARVEL domain containing 1                                                | -2.3               | ns     | ns     |
|   |   |   | LRP10        | LDL receptor related protein 10                                           | -2.3               | ns     | ns     |
|   |   |   | LOC102723885 | uncharacterized LOC102723885                                              | ns                 | ns     | -2.3   |
|   |   |   | NR6A1        | nuclear receptor subfamily 6, group A, member 1                           | ns                 | ns     | -2.3   |
|   |   |   | SLC16A3      | solute carrier family 16 (monocarboxylate transporter), member 3          | -2.3               | ns     | ns     |
|   |   |   | FOXJ3        | forkhead box J3                                                           | -2.3               | ns     | ns     |
|   |   |   | RASL11B      | RAS-like, family 11, member B                                             | ns                 | ns     | -2.3   |
|   |   |   | FANCE        | Fanconi anemia complementation group E                                    | ns                 | ns     | -2.3   |
|   |   |   | LOC105373786 | uncharacterized LOC105373786                                              | ns                 | ns     | -2.3   |
|   |   |   | ESRP1        | epithelial splicing regulatory protein 1                                  | ns                 | ns     | -2.3   |
|   |   |   | RAB30        | RAB30, member RAS oncogene family                                         | ns                 | ns     | -2.2   |
|   |   |   | SLC39A11     | solute carrier family 39, member 11                                       | -2.2               | ns     | ns     |
|   |   |   | ARL5B        | ADP-ribosylation factor like GTPase 5B                                    | ns                 | ns     | -2.2   |
|   |   |   | TAGLN2       | transgelin 2                                                              | -2.2               | ns     | ns     |
|   |   |   | CYB5R1       | cytochrome b5 reductase 1                                                 | ns                 | ns     | -2.2   |
|   |   |   | DAG1         | dystroglycan 1 (dystrophin-associated glycoprotein 1)                     | ns                 | ns     | -2.2   |
|   |   |   | MORF4L2      | mortality factor 4 like 2                                                 | -2.2               | ns     | ns     |
|   |   |   | MIR205HG     | MIR205 host gene                                                          | ns                 | ns     | -2.2   |
|   |   |   | CENPJ        | centromere protein J                                                      | ns                 | ns     | -2.2   |
|   |   |   | SORT1        | sortilin 1                                                                | ns                 | ns     | -2.2   |
|   |   |   | CPVL         | carboxypeptidase, vitellogenic-like                                       | -2.2               | ns     | ns     |
|   |   |   | NDFIP2       | Nedd4 family interacting protein 2                                        | -2.2               | ns     | ns     |
|   |   |   | MYCN         | v-myc avian myelocytomatosis viral oncogene neuroblastoma derived homolog | -2.2               | ns     | ns     |
|   |   |   | ITPRID2      | ITPR interacting domain containing 2                                      | ns                 | ns     | -2.2   |
|   |   |   | FAM78A       | family with sequence similarity 78, member A                              | -2.2               | ns     | ns     |
|   |   |   | KRT18P54     | keratin 18 pseudogene 54                                                  | ns                 | ns     | -2.2   |
|   |   |   | NEK6         | NIMA-related kinase 6                                                     | -2.2               | ns     | ns     |
|   |   |   | LHX2         | LIM homeobox 2                                                            | -2.2               | ns     | ns     |
|   |   |   | CECR9        | cat eye syndrome chromosome region, candidate 9 (non-protein coding)      | -2.2               | ns     | ns     |
|   |   |   | MAPK3        | mitogen-activated protein kinase 3                                        | -2.1               | ns     | ns     |
|   |   |   | RPSAP58      | ribosomal protein SA pseudogene 58                                        | ns                 | ns     | -2.1   |
|   |   |   | NFIL3        | nuclear factor, interleukin 3 regulated                                   | -2.1               | ns     | ns     |
|   |   |   | KCNQ1OT1     | KCNQ1 opposite strand                                                     | ns                 | ns     | -2.1   |
|   |   |   | FAM120AOS    | family with sequence similarity 120A opposite strand                      | ns                 | ns     | -2.1   |
|   |   |   | LOC100131262 | uncharacterized LOC100131262                                              | -2.1               | ns     | ns     |
|   |   |   | LOC101929460 | uncharacterized LOC101929460                                              | -2.1               | ns     | ns     |
|   |   |   | NKRF         | NFKB repressing factor                                                    | -2.1               | ns     | ns     |
|   |   |   | GPR150       | G protein-coupled receptor 150                                            | -2.1               | ns     | ns     |
|   |   |   | DLK2         | delta-like 2 homolog (Drosophila)                                         | -2.1               | ns     | ns     |
|   |   |   | HACD2        | 3-hydroxyacyl-CoA dehydratase 2                                           | -2.1               | ns     | ns     |
|   |   |   | ARHGAP10     | Rho GTPase activating protein 10                                          | -2.1               | ns     | ns     |
|   |   |   | FAM83D       | family with sequence similarity 83, member D                              | ns                 | ns     | -2.1   |
|   |   |   | KNTC1        | kinetochore associated 1                                                  | ns                 | ns     | -2.1   |
|   |   |   | LOC105377606 | uncharacterized LOC105377606                                              | ns                 | ns     | -2.1   |
|   |   |   | CLDND1       | claudin domain containing 1                                               | -2.1               | ns     | ns     |
|   |   |   | EDEM2        | ER degradation enhancer, mannosidase alpha-like 2                         | -2.1               | ns     | ns     |

| S | C | E | Symbol       | Name                                                                      | Linear Fold Change |        |        |
|---|---|---|--------------|---------------------------------------------------------------------------|--------------------|--------|--------|
|   |   |   |              |                                                                           | S vs C             | S vs E | E vs C |
|   |   |   | LOC440461    | Rho GTPase activating protein 27 pseudogene                               | -2.1               | ns     | ns     |
|   |   |   | PPP3CA       | protein phosphatase 3, catalytic subunit, alpha isozyme                   | -2.1               | ns     | ns     |
|   |   |   | SLC29A3      | solute carrier family 29 (equilibrative nucleoside transporter), member 3 | ns                 | ns     | -2.1   |
|   |   |   | EIF2AK2      | eukaryotic translation initiation factor 2-alpha kinase 2                 | -2.1               | ns     | ns     |
|   |   |   | ANXA3        | annexin A3                                                                | ns                 | ns     | -2.1   |
|   |   |   | CSPP1        | centrosome and spindle pole associated protein 1                          | ns                 | ns     | -2.1   |
|   |   |   | TRIM24       | tripartite motif containing 24                                            | ns                 | ns     | -2.1   |
|   |   |   | USP6NL       | USP6 N-terminal like                                                      | ns                 | ns     | -2.1   |
|   |   |   | ACVR2B       | activin A receptor type IIB                                               | ns                 | ns     | -2.1   |
|   |   |   | ERBB3        | erb-b2 receptor tyrosine kinase 3                                         | -2.0               | ns     | ns     |
|   |   |   | PTPN4        | protein tyrosine phosphatase, non-receptor type 4 (megakaryocyte)         | -2.0               | ns     | ns     |
|   |   |   | POLI         | polymerase (DNA directed) iota                                            | ns                 | ns     | -2.0   |
|   |   |   | RSPRY1       | ring finger and SPRY domain containing 1                                  | -2.0               | ns     | ns     |
|   |   |   | PRRG1        | proline rich Gla (G-carboxyglutamic acid) 1                               | ns                 | ns     | -2.0   |
|   |   |   | SLC49A4      | solute carrier family 49 member 4                                         | ns                 | ns     | -2.0   |
|   |   |   | NEDD9        | neural precursor cell expressed, developmentally down-regulated 9         | ns                 | ns     | -2.0   |
|   |   |   | SNORA84      | small nucleolar RNA, H                                                    | -2.0               | ns     | ns     |
|   |   |   | LOXL1        | lysyl oxidase-like 1                                                      | -2.0               | ns     | ns     |
|   |   |   | GAA          | glucosidase, alpha; acid                                                  | -2.0               | ns     | ns     |
|   |   |   | ORC1         | origin recognition complex subunit 1                                      | ns                 | ns     | -2.0   |
|   |   |   | CDK17        | cyclin-dependent kinase 17                                                | -2.0               | ns     | ns     |
|   |   |   | HK2          | hexokinase 2                                                              | -2.0               | ns     | ns     |
|   |   |   | PXDC1        | PX domain containing 1                                                    | ns                 | ns     | -2.0   |
|   |   |   | KRTCAP3      | keratinocyte associated protein 3                                         | -2.0               | ns     | ns     |
|   |   |   | CXCL9        | chemokine (C-X-C motif) ligand 9                                          | ns                 | -50.7  | ns     |
|   |   |   | PAEP         | progesterone-associated endometrial protein                               | ns                 | -42.6  | ns     |
|   |   |   | OR5H14       | olfactory receptor, family 5, subfamily H, member 14                      | ns                 | -25.9  | ns     |
|   |   |   | LOC100506530 | uncharacterized LOC100506530                                              | ns                 | -16.6  | ns     |
|   |   |   | TAC3         | tachykinin 3                                                              | ns                 | -16.1  | ns     |
|   |   |   | LOC105374458 | uncharacterized LOC105374458                                              | ns                 | -15.4  | ns     |
|   |   |   | MYO16-AS1    | MYO16 antisense RNA 1                                                     | ns                 | -12.6  | ns     |
|   |   |   | KLRF1        | killer cell lectin-like receptor subfamily F, member 1                    | ns                 | -12.1  | ns     |
|   |   |   | SLAMF6       | SLAM family member 6                                                      | ns                 | -11.3  | ns     |
|   |   |   | LOC105373334 | uncharacterized LOC105373334                                              | ns                 | -10.8  | ns     |
|   |   |   | C1orf54      | chromosome 1 open reading frame 54                                        | ns                 | ns     | 9.9    |
|   |   |   | MMP3         | matrix metalloproteinase 3                                                | ns                 | -9.6   | ns     |
|   |   |   | SPINK2       | serine peptidase inhibitor, Kazal type 2 (acrosin-trypsin inhibitor)      | ns                 | -9.3   | ns     |
|   |   |   | LOC105379051 | uncharacterized LOC105379051                                              | ns                 | -9.2   | ns     |
|   |   |   | SRGN         | serglycin                                                                 | ns                 | ns     | 9.2    |
|   |   |   | KLRF2        | killer cell lectin-like receptor subfamily F, member 2                    | ns                 | -8.7   | ns     |
|   |   |   | KLRC2        | killer cell lectin-like receptor subfamily C, member 2                    | ns                 | -8.6   | ns     |
|   |   |   | C4BPA        | complement component 4 binding protein, alpha                             | ns                 | -8.6   | ns     |
|   |   |   | CAMK2D       | calcium                                                                   | ns                 | ns     | 8.0    |
|   |   |   | CYBB         | cytochrome b-245, beta polypeptide                                        | ns                 | ns     | 7.3    |
|   |   |   | CES1P1       | carboxylesterase 1 pseudogene 1                                           | ns                 | ns     | 7.0    |
|   |   |   | VCAM1        | vascular cell adhesion molecule 1                                         | ns                 | ns     | 6.9    |
|   |   |   | ANTXR1       | anthrax toxin receptor 1                                                  | ns                 | -6.8   | ns     |
|   |   |   | AADAC        | arylacetamide deacetylase                                                 | ns                 | -6.7   | ns     |
|   |   |   | GNLY         | granulysin                                                                | ns                 | -6.7   | ns     |
|   |   |   | IGFBP5       | insulin like growth factor binding protein 5                              | ns                 | ns     | 6.6    |
|   |   |   | CCL8         | chemokine (C-C motif) ligand 8                                            | ns                 | -6.4   | ns     |
|   |   |   | TM4SF5       | transmembrane 4 L six family member 5                                     | ns                 | -6.3   | ns     |
|   |   |   | MS4A4A       | membrane-spanning 4-domains, subfamily A, member 4A                       | ns                 | ns     | 6.3    |
|   |   |   | GBP4         | guanylate binding protein 4                                               | ns                 | ns     | 6.3    |
|   |   |   | MUC1         | mucin 1, cell surface associated                                          | ns                 | -6.2   | ns     |

| S | C | E | Symbol       | Name                                                                                          | Linear Fold Change |        |        |
|---|---|---|--------------|-----------------------------------------------------------------------------------------------|--------------------|--------|--------|
|   |   |   |              |                                                                                               | S vs C             | S vs E | E vs C |
|   |   |   | MMRN1        | multimerin 1                                                                                  | ns                 | ns     | 6.2    |
|   |   |   | OAS2         | 2-5-oligoadenylate synthetase 2                                                               | ns                 | -6.2   | ns     |
|   |   |   | NAPSB        | napsin B aspartic peptidase, pseudogene                                                       | ns                 | -5.6   | ns     |
|   |   |   | ENPP4        | ectonucleotide pyrophosphatase                                                                | ns                 | ns     | 6.0    |
|   |   |   | TOX          | thymocyte selection-associated high mobility group box                                        | ns                 | ns     | 5.9    |
|   |   |   | LINC01338    | long intergenic non-protein coding RNA 1338                                                   | ns                 | -5.9   | ns     |
|   |   |   | NTN4         | netrin 4                                                                                      | ns                 | -5.8   | ns     |
|   |   |   | C3AR1        | complement component 3a receptor 1                                                            | ns                 | ns     | 5.7    |
|   |   |   | CLTRN        | collectrin, amino acid transport regulator                                                    | ns                 | -5.3   | ns     |
|   |   |   | EDNRA        | endothelin receptor type A                                                                    | ns                 | ns     | 5.6    |
|   |   |   | ST3GAL5      | ST3 beta-galactoside alpha-2,3-sialyltransferase 5                                            | ns                 | -5.4   | ns     |
|   |   |   | S100A8       | S100 calcium binding protein A8                                                               | ns                 | -5.3   | ns     |
|   |   |   | CD163        | CD163 molecule                                                                                | ns                 | ns     | 5.3    |
|   |   |   | BICC1        | BicC family RNA binding protein 1                                                             | ns                 | ns     | 5.3    |
|   |   |   | LOC102724587 | uncharacterized LOC102724587                                                                  | ns                 | ns     | 5.3    |
|   |   |   | VIM-AS1      | VIM antisense RNA 1                                                                           | ns                 | ns     | 5.2    |
|   |   |   | GPR65        | G protein-coupled receptor 65                                                                 | ns                 | -4.5   | ns     |
|   |   |   | CLU          | clusterin                                                                                     | ns                 | -5.2   | ns     |
|   |   |   | TDRD6        | tudor domain containing 6                                                                     | ns                 | -5.1   | ns     |
|   |   |   | ADGRF5       | adhesion G protein-coupled receptor F5                                                        | ns                 | ns     | 5.0    |
|   |   |   | EPHB2        | EPH receptor B2                                                                               | ns                 | -5.0   | ns     |
|   |   |   | LOC105374732 | uncharacterized LOC105374732                                                                  | ns                 | -4.9   | ns     |
|   |   |   | CRIP1        | cysteine-rich protein 1 (intestinal)                                                          | ns                 | -4.9   | ns     |
|   |   |   | LOC100996713 | uncharacterized LOC100996713                                                                  | ns                 | ns     | 4.8    |
|   |   |   | SEMA5A       | semaphorin 5A                                                                                 | ns                 | -4.7   | ns     |
|   |   |   | IFIT3        | interferon-induced protein with tetratricopeptide repeats 3                                   | ns                 | -4.7   | ns     |
|   |   |   | ITGAD        | integrin alpha D                                                                              | ns                 | -4.7   | ns     |
|   |   |   | VSIG4        | V-set and immunoglobulin domain containing 4                                                  | ns                 | ns     | 4.7    |
|   |   |   | PROS1        | protein S (alpha)                                                                             | ns                 | ns     | 4.6    |
|   |   |   | F3           | coagulation factor III (thromboplastin, tissue factor)                                        | ns                 | ns     | 4.6    |
|   |   |   | PLXDC2       | plexin domain containing 2                                                                    | ns                 | -4.5   | ns     |
|   |   |   | LEFTY2       | left-right determination factor 2                                                             | ns                 | -4.5   | ns     |
|   |   |   | ECM2         | extracellular matrix protein 2, female organ and adipocyte specific                           | ns                 | -4.5   | ns     |
|   |   |   | MYL10        | myosin light chain 10                                                                         | ns                 | -4.5   | ns     |
|   |   |   | LOC101929531 | uncharacterized LOC101929531                                                                  | ns                 | -4.5   | ns     |
|   |   |   | GSTA1        | glutathione S-transferase alpha 1                                                             | ns                 | -4.4   | ns     |
|   |   |   | DAW1         | dynein assembly factor with WDR repeat domains 1                                              | ns                 | -4.4   | ns     |
|   |   |   | TTC39C       | tetratricopeptide repeat domain 39C                                                           | ns                 | -4.4   | ns     |
|   |   |   | DUSP23       | dual specificity phosphatase 23                                                               | ns                 | -4.4   | ns     |
|   |   |   | SMCO3        | single-pass membrane protein with coiled-coil domains 3                                       | ns                 | -4.4   | ns     |
|   |   |   | CD44         | CD44 molecule (Indian blood group)                                                            | ns                 | ns     | 4.3    |
|   |   |   | SLC12A2      | solute carrier family 12 (sodium                                                              | ns                 | ns     | 4.3    |
|   |   |   | MAGEH1       | MAGE family member H1                                                                         | ns                 | ns     | 4.3    |
|   |   |   | RNF125       | ring finger protein 125, E3 ubiquitin protein ligase                                          | ns                 | ns     | 4.2    |
|   |   |   | PZP          | pregnancy-zone protein                                                                        | ns                 | -4.2   | ns     |
|   |   |   | EHD2         | EH domain containing 2                                                                        | ns                 | ns     | 4.2    |
|   |   |   | CD109        | CD109 molecule                                                                                | ns                 | ns     | 4.2    |
|   |   |   | CCN2         | cellular communication network factor 2                                                       | ns                 | -4.1   | ns     |
|   |   |   | ITGA4        | integrin alpha 4                                                                              | ns                 | ns     | 4.1    |
|   |   |   | SLC9A9       | solute carrier family 9, subfamily A (NHE9, cation proton antiporter 9), member 9             | ns                 | ns     | 4.1    |
|   |   |   | KLRD1        | killer cell lectin-like receptor subfamily D, member 1                                        | ns                 | ns     | 4.0    |
|   |   |   | SERPINE1     | serpin peptidase inhibitor, clade E (nexin, plasminogen activator inhibitor type 1), member 1 | ns                 | -4.0   | ns     |
|   |   |   | CRLF1        | cytokine receptor-like factor 1                                                               | ns                 | -4.0   | ns     |
|   |   |   | PGM5-AS1     | PGM5 antisense RNA 1                                                                          | ns                 | -4.0   | ns     |
|   |   |   | PRKD1        | protein kinase D1                                                                             | ns                 | ns     | 4.0    |

| S | C | E | Symbol           | Name                                                                  | Linear Fold Change |        |        |
|---|---|---|------------------|-----------------------------------------------------------------------|--------------------|--------|--------|
|   |   |   |                  |                                                                       | S vs C             | S vs E | E vs C |
|   |   |   | IGLC2            | immunoglobulin lambda constant 2 (Kern-Oz- marker)                    | ns                 | -3.9   | ns     |
|   |   |   | TOB1             | transducer of ERBB2, 1                                                | ns                 | ns     | 3.9    |
|   |   |   | LL22NC03-104C7.1 | uncharacterized LOC105373004                                          | ns                 | -3.7   | ns     |
|   |   |   | ACSS3            | acyl-CoA synthetase short-chain family member 3                       | ns                 | ns     | 3.9    |
|   |   |   | ADGRF1           | adhesion G protein-coupled receptor F1                                | ns                 | -3.8   | ns     |
|   |   |   | KCNQ5-IT1        | KCNQ5 intronic transcript 1                                           | ns                 | -3.8   | ns     |
|   |   |   | CD69             | CD69 molecule                                                         | ns                 | -3.8   | ns     |
|   |   |   | GIMAP7           | GTPase, IMAP family member 7                                          | ns                 | ns     | 3.8    |
|   |   |   | MYH11            | myosin, heavy chain 11, smooth muscle                                 | ns                 | ns     | 3.7    |
|   |   |   | LOC102724156     | uncharacterized LOC102724156                                          | ns                 | -3.7   | ns     |
|   |   |   | SNORA47          | small nucleolar RNA, H                                                | ns                 | ns     | 3.7    |
|   |   |   | PMCH             | pro-melanin-concentrating hormone                                     | ns                 | -3.7   | ns     |
|   |   |   | MAP9             | microtubule-associated protein 9                                      | ns                 | ns     | 3.7    |
|   |   |   | GIMAP4           | GTPase, IMAP family member 4                                          | ns                 | ns     | 3.7    |
|   |   |   | LOC105377590     | uncharacterized LOC105377590                                          | ns                 | -3.7   | ns     |
|   |   |   | OAS3             | 2-5-oligoadenylate synthetase 3                                       | ns                 | -3.7   | ns     |
|   |   |   | PSENEN           | presenilin enhancer gamma secretase subunit                           | ns                 | -3.6   | ns     |
|   |   |   | PCGF5            | polycomb group ring finger 5                                          | ns                 | ns     | 3.6    |
|   |   |   | CD82             | CD82 molecule                                                         | ns                 | -3.6   | ns     |
|   |   |   | PLEK             | pleckstrin                                                            | ns                 | ns     | 3.6    |
|   |   |   | PRLR             | prolactin receptor                                                    | ns                 | ns     | 3.6    |
|   |   |   | PLA2G4A          | phospholipase A2, group IVA (cytosolic, calcium-dependent)            | ns                 | ns     | 3.6    |
|   |   |   | GASK1B           | golgi associated kinase 1B                                            | ns                 | ns     | 3.6    |
|   |   |   | XAF1             | XIAP associated factor 1                                              | ns                 | -3.6   | ns     |
|   |   |   | GPC4             | glypican 4                                                            | ns                 | -3.5   | ns     |
|   |   |   | MORN2            | MORN repeat containing 2                                              | ns                 | -3.5   | ns     |
|   |   |   | MPEG1            | macrophage expressed 1                                                | ns                 | ns     | 3.5    |
|   |   |   | ZNF675           | zinc finger protein 675                                               | ns                 | -3.5   | ns     |
|   |   |   | PODNL1           | podocan-like 1                                                        | ns                 | -3.5   | ns     |
|   |   |   | CDH11            | cadherin 11, type 2, OB-cadherin (osteoblast)                         | ns                 | ns     | 3.5    |
|   |   |   | GDAP1            | ganglioside induced differentiation associated protein 1              | ns                 | ns     | 3.5    |
|   |   |   | HSD17B6          | hydroxysteroid (17-beta) dehydrogenase 6                              | ns                 | ns     | 3.5    |
|   |   |   | DYNC2LI1         | dynein, cytoplasmic 2, light intermediate chain 1                     | ns                 | ns     | 3.5    |
|   |   |   | ITM2A            | integral membrane protein 2A                                          | ns                 | ns     | 3.5    |
|   |   |   | SLC30A4          | solute carrier family 30 (zinc transporter), member 4                 | ns                 | -3.5   | ns     |
|   |   |   | KCNA4            | potassium channel, voltage gated shaker related subfamily A, member 4 | ns                 | -3.5   | ns     |
|   |   |   | ALOX5AP          | arachidonate 5-lipoxygenase-activating protein                        | ns                 | ns     | 3.4    |
|   |   |   | EDIL3            | EGF-like repeats and discoidin I-like domains 3                       | ns                 | ns     | 3.4    |
|   |   |   | BDH2             | 3-hydroxybutyrate dehydrogenase, type 2                               | ns                 | ns     | 3.4    |
|   |   |   | CD86             | CD86 molecule                                                         | ns                 | ns     | 3.4    |
|   |   |   | RETREG1          | reticulophagy regulator 1                                             | ns                 | ns     | 3.4    |
|   |   |   | PDE8B            | phosphodiesterase 8B                                                  | ns                 | ns     | 3.4    |
|   |   |   | LOC101928919     | uncharacterized LOC101928919                                          | ns                 | -3.4   | ns     |
|   |   |   | LRRC15           | leucine rich repeat containing 15                                     | ns                 | -3.4   | ns     |
|   |   |   | KHDRBS3          | KH domain containing, RNA binding, signal transduction associated 3   | ns                 | -3.4   | ns     |
|   |   |   | TSPAN8           | tetraspanin 8                                                         | ns                 | -3.4   | ns     |
|   |   |   | ROS1             | ROS proto-oncogene 1, receptor tyrosine kinase                        | ns                 | -3.3   | ns     |
|   |   |   | TEK              | TEK tyrosine kinase, endothelial                                      | ns                 | ns     | 3.3    |
|   |   |   | FKBP5            | FK506 binding protein 5                                               | ns                 | ns     | 3.3    |
|   |   |   | PRTFDC1          | phosphoribosyl transferase domain containing 1                        | ns                 | ns     | 3.3    |
|   |   |   | HACD1            | 3-hydroxyacyl-CoA dehydratase 1                                       | ns                 | -3.3   | ns     |
|   |   |   | GADD45B          | growth arrest and DNA-damage-inducible, beta                          | ns                 | -3.3   | ns     |
|   |   |   | CHST7            | carbohydrate (N-acetylglucosamine 6-O) sulfotransferase 7             | ns                 | -3.3   | ns     |
|   |   |   | MAMDC2-AS1       | MAMDC2 antisense RNA 1                                                | ns                 | -3.3   | ns     |
|   |   |   | MAF              | v-maf avian musculoaponeurotic fibrosarcoma oncogene homolog          | ns                 | ns     | 3.3    |



| S | C | E | Symbol       | Name                                                                        | Linear Fold Change |        |        |
|---|---|---|--------------|-----------------------------------------------------------------------------|--------------------|--------|--------|
|   |   |   |              |                                                                             | S vs C             | S vs E | E vs C |
|   |   |   | RHOJ         | ras homolog family member J                                                 | ns                 | ns     | 3.3    |
|   |   |   | VIM          | vimentin                                                                    | ns                 | ns     | 3.3    |
|   |   |   | ZFAND4       | zinc finger, AN1-type domain 4                                              | ns                 | ns     | 3.3    |
|   |   |   | WDR86-AS1    | WDR86 antisense RNA 1                                                       | ns                 | -3.3   | ns     |
|   |   |   | ITPR1        | inositol 1,4,5-trisphosphate receptor, type 1                               | ns                 | ns     | 3.3    |
|   |   |   | ARRDC4       | arrestin domain containing 4                                                | ns                 | ns     | 3.3    |
|   |   |   | ATP13A3      | ATPase type 13A3                                                            | ns                 | -3.3   | ns     |
|   |   |   | MCAM         | melanoma cell adhesion molecule                                             | ns                 | -3.3   | ns     |
|   |   |   | SLC43A3      | solute carrier family 43, member 3                                          | ns                 | -3.3   | ns     |
|   |   |   | MIPOL1       | mirror-image polydactyly 1                                                  | ns                 | ns     | 3.3    |
|   |   |   | CCL5         | chemokine (C-C motif) ligand 5                                              | ns                 | -3.3   | ns     |
|   |   |   | APOC1        | apolipoprotein C-I                                                          | ns                 | -3.2   | ns     |
|   |   |   | CYP39A1      | cytochrome P450, family 39, subfamily A, polypeptide 1                      | ns                 | -3.2   | ns     |
|   |   |   | TTPAL        | tocopherol (alpha) transfer protein-like                                    | ns                 | -3.2   | ns     |
|   |   |   | STAB2        | stabilin 2                                                                  | ns                 | -3.2   | ns     |
|   |   |   | HSD17B14     | hydroxysteroid (17-beta) dehydrogenase 14                                   | ns                 | -3.2   | ns     |
|   |   |   | ZFP36        | ZFP36 ring finger protein                                                   | ns                 | -3.2   | ns     |
|   |   |   | MGAT2        | mannosyl (alpha-1,6-)-glycoprotein beta-1,2-N-acetylglucosaminyltransferase | ns                 | -3.2   | ns     |
|   |   |   | CDH13        | cadherin 13                                                                 | ns                 | ns     | 3.2    |
|   |   |   | MIR3918      | microRNA 3918                                                               | ns                 | -3.2   | ns     |
|   |   |   | PPDPF        | pancreatic progenitor cell differentiation and proliferation factor         | ns                 | -3.2   | ns     |
|   |   |   | LRP12        | LDL receptor related protein 12                                             | ns                 | ns     | 3.2    |
|   |   |   | CADPS2       | Ca <sup>++</sup> -dependent secretion activator 2                           | ns                 | ns     | 3.2    |
|   |   |   | LOC105377134 | uncharacterized LOC105377134                                                | ns                 | -3.2   | ns     |
|   |   |   | HERC6        | HECT and RLD domain containing E3 ubiquitin protein ligase family member 6  | ns                 | -3.2   | ns     |
|   |   |   | SLAMF8       | SLAM family member 8                                                        | ns                 | -3.1   | ns     |
|   |   |   | RAB32        | RAB32, member RAS oncogene family                                           | ns                 | -3.1   | ns     |
|   |   |   | TREM2        | triggering receptor expressed on myeloid cells 2                            | ns                 | ns     | 3.1    |
|   |   |   | SMIM14       | small integral membrane protein 14                                          | ns                 | -3.1   | ns     |
|   |   |   | LINC01139    | long intergenic non-protein coding RNA 1139                                 | ns                 | ns     | 3.1    |
|   |   |   | ABCC3        | ATP binding cassette subfamily C member 3                                   | ns                 | -3.1   | ns     |
|   |   |   | BTN3A2       | butyrophilin, subfamily 3, member A2                                        | ns                 | ns     | 3.1    |
|   |   |   | ITGAM        | integrin, alpha M (complement component 3 receptor 3 subunit)               | ns                 | -3.1   | ns     |
|   |   |   | TNFSF8       | tumor necrosis factor (ligand) superfamily, member 8                        | ns                 | ns     | 3.1    |
|   |   |   | LINC00706    | long intergenic non-protein coding RNA 706                                  | ns                 | -3.1   | ns     |
|   |   |   | SRPX2        | sushi-repeat containing protein, X-linked 2                                 | ns                 | ns     | 3.1    |
|   |   |   | PIGK         | phosphatidylinositol glycan anchor biosynthesis class K                     | ns                 | -3.1   | ns     |
|   |   |   | IL15RA       | interleukin 15 receptor, alpha                                              | ns                 | -3.1   | ns     |
|   |   |   | PVR          | poliovirus receptor                                                         | ns                 | -3.1   | ns     |
|   |   |   | SFT2D2       | SFT2 domain containing 2                                                    | ns                 | -3.1   | ns     |
|   |   |   | FCGR1A       | Fc fragment of IgG, high affinity Ia, receptor (CD64)                       | ns                 | ns     | 3.1    |
|   |   |   | NID2         | nidogen 2 (osteonidogen)                                                    | ns                 | ns     | 3.1    |
|   |   |   | TMEM31       | transmembrane protein 31                                                    | ns                 | -3.1   | ns     |
|   |   |   | LINC00484    | long intergenic non-protein coding RNA 484                                  | ns                 | -3.1   | ns     |
|   |   |   | PRXL2C       | peroxiredoxin like 2C                                                       | ns                 | -3.1   | ns     |
|   |   |   | FLNA         | filamin A, alpha                                                            | ns                 | -3.1   | ns     |
|   |   |   | C8orf48      | chromosome 8 open reading frame 48                                          | ns                 | ns     | 3.1    |
|   |   |   | SERTM2       | serine rich and transmembrane domain containing 2                           | ns                 | -3.1   | ns     |
|   |   |   | ANKRD36BP1   | ankyrin repeat domain 36B pseudogene 1                                      | ns                 | -3.1   | ns     |
|   |   |   | PLCB4        | phospholipase C, beta 4                                                     | ns                 | ns     | 3.1    |
|   |   |   | RPGRIP1L     | RPGRIP1-like                                                                | ns                 | -3.1   | ns     |
|   |   |   | CBL          | Cbl proto-oncogene, E3 ubiquitin protein ligase                             | ns                 | -3.0   | ns     |
|   |   |   | ATP8B4       | ATPase, class I, type 8B, member 4                                          | ns                 | ns     | 3.0    |
|   |   |   | SAA1         | serum amyloid A1                                                            | ns                 | -3.0   | ns     |
|   |   |   | PLCE1        | phospholipase C, epsilon 1                                                  | ns                 | ns     | 3.0    |

| S | C | E | Symbol       | Name                                                                                     | Linear Fold Change |        |        |
|---|---|---|--------------|------------------------------------------------------------------------------------------|--------------------|--------|--------|
|   |   |   |              |                                                                                          | S vs C             | S vs E | E vs C |
|   |   |   | DEPP1        | DEPP1 autophagy regulator                                                                | ns                 | ns     | 3.0    |
|   |   |   | PKP4         | plakophilin 4                                                                            | ns                 | ns     | 3.0    |
|   |   |   | ADGRD1       | adhesion G protein-coupled receptor D1                                                   | ns                 | ns     | 3.0    |
|   |   |   | GBP1         | guanylate binding protein 1, interferon-inducible                                        | ns                 | -3.0   | ns     |
|   |   |   | SNX16        | sorting nexin 16                                                                         | ns                 | -3.0   | ns     |
|   |   |   | OSR2         | odd-skipped related transcription factor 2                                               | ns                 | -3.0   | ns     |
|   |   |   | CHSY3        | chondroitin sulfate synthase 3                                                           | ns                 | ns     | 3.0    |
|   |   |   | IKZF3        | IKAROS family zinc finger 3                                                              | ns                 | -3.0   | ns     |
|   |   |   | MED14OS      | MED14 opposite strand                                                                    | ns                 | ns     | 3.0    |
|   |   |   | FGD5         | FYVE, RhoGEF and PH domain containing 5                                                  | ns                 | ns     | 3.0    |
|   |   |   | ZDHHC9       | zinc finger, DHHC-type containing 9                                                      | ns                 | -3.0   | ns     |
|   |   |   | LINC01357    | long intergenic non-protein coding RNA 1357                                              | ns                 | -3.0   | ns     |
|   |   |   | DUSP1        | dual specificity phosphatase 1                                                           | ns                 | -2.9   | ns     |
|   |   |   | LOC101927780 | uncharacterized LOC101927780                                                             | ns                 | -2.9   | ns     |
|   |   |   | CACNA2D1     | calcium channel, voltage-dependent, alpha 2                                              | ns                 | ns     | 2.9    |
|   |   |   | PAPSS2       | 3-phosphoadenosine 5-phosphosulfate synthase 2                                           | ns                 | ns     | 2.9    |
|   |   |   | BST2         | bone marrow stromal cell antigen 2                                                       | ns                 | -2.9   | ns     |
|   |   |   | IRF8         | interferon regulatory factor 8                                                           | ns                 | -2.9   | ns     |
|   |   |   | HLA-L        | major histocompatibility complex, class I, L (pseudogene)                                | ns                 | -2.9   | ns     |
|   |   |   | CMTM7        | CKLF-like MARVEL transmembrane domain containing 7                                       | ns                 | ns     | 2.9    |
|   |   |   | GNG4         | guanine nucleotide binding protein (G protein), gamma 4                                  | ns                 | -2.9   | ns     |
|   |   |   | AIF1         | allograft inflammatory factor 1                                                          | ns                 | ns     | 2.9    |
|   |   |   | DOP1B        | DOP1 leucine zipper like protein B                                                       | ns                 | -2.9   | ns     |
|   |   |   | PYCARD       | PYD and CARD domain containing                                                           | ns                 | ns     | 2.9    |
|   |   |   | SPRED1       | sprouty-related, EVH1 domain containing 1                                                | ns                 | ns     | 2.9    |
|   |   |   | KIR2DL2      | killer cell immunoglobulin-like receptor, two domains, long cytoplasmic tail, 2          | ns                 | -2.9   | ns     |
|   |   |   | PCDHB2       | protocadherin beta 2                                                                     | ns                 | -2.9   | ns     |
|   |   |   | NCKAP1L      | NCK-associated protein 1-like                                                            | ns                 | ns     | 2.9    |
|   |   |   | CABYR        | calcium binding tyrosine-(Y)-phosphorylation regulated                                   | ns                 | -2.9   | ns     |
|   |   |   | HLTF         | helicase-like transcription factor                                                       | ns                 | -2.9   | ns     |
|   |   |   | LPCAT2       | lysophosphatidylcholine acyltransferase 2                                                | ns                 | -2.8   | ns     |
|   |   |   | TRIM21       | tripartite motif containing 21                                                           | ns                 | -2.8   | ns     |
|   |   |   | RNF24        | ring finger protein 24                                                                   | ns                 | -2.8   | ns     |
|   |   |   | SLFN13       | schlafen family member 13                                                                | ns                 | ns     | 2.8    |
|   |   |   | SH3BGRL3     | SH3 domain binding glutamate-rich protein like 3                                         | ns                 | -2.8   | ns     |
|   |   |   | SELENOM      | selenoprotein M                                                                          | ns                 | -2.8   | ns     |
|   |   |   | CYBA         | cytochrome b-245, alpha polypeptide                                                      | ns                 | -2.8   | ns     |
|   |   |   | ATP11C       | ATPase, class VI, type 11C                                                               | ns                 | -2.8   | ns     |
|   |   |   | IFITM4P      | interferon induced transmembrane protein 4 pseudogene                                    | ns                 | -2.8   | ns     |
|   |   |   | CMC1         | C-x(9)-C motif containing 1                                                              | ns                 | -2.8   | ns     |
|   |   |   | TUBA1A       | tubulin, alpha 1a                                                                        | ns                 | ns     | 2.8    |
|   |   |   | LOC100506688 | uncharacterized LOC100506688                                                             | ns                 | ns     | 2.8    |
|   |   |   | LILRB4       | leukocyte immunoglobulin-like receptor, subfamily B (with TM and ITIM domains), member 4 | ns                 | -2.7   | ns     |
|   |   |   | FOSL2        | FOS-like antigen 2                                                                       | ns                 | -2.7   | ns     |
|   |   |   | TNFSF13      | tumor necrosis factor (ligand) superfamily, member 13                                    | ns                 | ns     | 2.7    |
|   |   |   | ZNF32-AS1    | ZNF32 antisense RNA 1                                                                    | ns                 | ns     | 2.7    |
|   |   |   | LOC101928047 | uncharacterized LOC101928047                                                             | ns                 | -2.7   | ns     |
|   |   |   | ADAMTS9-AS2  | ADAMTS9 antisense RNA 2                                                                  | ns                 | ns     | 2.7    |
|   |   |   | TENT5C       | terminal nucleotidyltransferase 5C                                                       | ns                 | ns     | 2.7    |
|   |   |   | STMN2        | stathmin 2                                                                               | ns                 | -2.7   | ns     |
|   |   |   | IFIT5        | interferon-induced protein with tetratricopeptide repeats 5                              | ns                 | -2.7   | ns     |
|   |   |   | HABP4        | hyaluronan binding protein 4                                                             | ns                 | -2.7   | ns     |
|   |   |   | PIK3R1       | phosphoinositide-3-kinase, regulatory subunit 1 (alpha)                                  | ns                 | -2.7   | ns     |
|   |   |   | GGT2         | gamma-glutamyltransferase 2                                                              | ns                 | -2.7   | ns     |
|   |   |   | CCDC80       | coiled-coil domain containing 80                                                         | ns                 | -2.7   | ns     |

| S | C | E | Symbol       | Name                                                                   | Linear Fold Change |        |        |
|---|---|---|--------------|------------------------------------------------------------------------|--------------------|--------|--------|
|   |   |   |              |                                                                        | S vs C             | S vs E | E vs C |
|   |   |   | C12orf60     | chromosome 12 open reading frame 60                                    | ns                 | -2.7   | ns     |
|   |   |   | CLUAP1       | clusterin associated protein 1                                         | ns                 | ns     | 2.7    |
|   |   |   | FNDC1        | fibronectin type III domain containing 1                               | ns                 | ns     | 2.7    |
|   |   |   | VAT1         | vesicle amine transport 1                                              | ns                 | -2.7   | ns     |
|   |   |   | TACR3        | tachykinin receptor 3                                                  | ns                 | -2.7   | ns     |
|   |   |   | PIAS2        | protein inhibitor of activated STAT 2                                  | ns                 | ns     | 2.7    |
|   |   |   | GRIA3        | glutamate receptor, ionotropic, AMPA 3                                 | ns                 | -2.7   | ns     |
|   |   |   | BICD1        | bicaudal D homolog 1 (Drosophila)                                      | ns                 | ns     | 2.7    |
|   |   |   | CLIP3        | CAP-GLY domain containing linker protein 3                             | ns                 | ns     | 2.6    |
|   |   |   | SNX10        | sorting nexin 10                                                       | ns                 | -2.6   | ns     |
|   |   |   | BST1         | bone marrow stromal cell antigen 1                                     | ns                 | -2.6   | ns     |
|   |   |   | C19orf53     | chromosome 19 open reading frame 53                                    | ns                 | -2.6   | ns     |
|   |   |   | MITF         | microphthalmia-associated transcription factor                         | ns                 | -2.6   | ns     |
|   |   |   | CHST15       | carbohydrate (N-acetylgalactosamine 4-sulfate 6-O) sulfotransferase 15 | ns                 | -2.6   | ns     |
|   |   |   | KIF13B       | kinesin family member 13B                                              | ns                 | ns     | 2.6    |
|   |   |   | LOX          | lysyl oxidase                                                          | ns                 | -2.6   | ns     |
|   |   |   | MYDGF        | myeloid-derived growth factor                                          | ns                 | -2.6   | ns     |
|   |   |   | LACTB2       | lactamase, beta 2                                                      | ns                 | ns     | 2.6    |
|   |   |   | RSAD2        | radical S-adenosyl methionine domain containing 2                      | ns                 | -2.6   | ns     |
|   |   |   | ERBIN        | erbB2 interacting protein                                              | ns                 | -2.6   | ns     |
|   |   |   | FBXO6        | F-box protein 6                                                        | ns                 | -2.6   | ns     |
|   |   |   | TMEM176A     | transmembrane protein 176A                                             | ns                 | -2.6   | ns     |
|   |   |   | NAIP         | NLR family, apoptosis inhibitory protein                               | ns                 | ns     | 2.6    |
|   |   |   | CEP112       | centrosomal protein 112kDa                                             | ns                 | ns     | 2.6    |
|   |   |   | C4A          | complement component 4A (Rodgers blood group)                          | ns                 | -2.6   | ns     |
|   |   |   | RCN3         | reticulocalbin 3, EF-hand calcium binding domain                       | ns                 | -2.6   | ns     |
|   |   |   | REX1BD       | required for excision 1-B domain containing                            | ns                 | -2.6   | ns     |
|   |   |   | RECK         | reversion-inducing-cysteine-rich protein with kazal motifs             | ns                 | -2.6   | ns     |
|   |   |   | PTK2B        | protein tyrosine kinase 2 beta                                         | ns                 | -2.6   | ns     |
|   |   |   | AAMDC        | adipogenesis associated, Mth938 domain containing                      | ns                 | -2.6   | ns     |
|   |   |   | ACOT9        | acyl-CoA thioesterase 9                                                | ns                 | ns     | 2.6    |
|   |   |   | TMX3         | thioredoxin-related transmembrane protein 3                            | ns                 | -2.6   | ns     |
|   |   |   | CD4          | CD4 molecule                                                           | ns                 | ns     | 2.6    |
|   |   |   | ADAP2        | ArfGAP with dual PH domains 2                                          | ns                 | ns     | 2.6    |
|   |   |   | TMSB4XP4     | thymosin beta 4, X-linked pseudogene 4                                 | ns                 | ns     | 2.6    |
|   |   |   | ATG4A        | autophagy related 4A, cysteine peptidase                               | ns                 | ns     | 2.6    |
|   |   |   | C4B          | complement component 4B (Chido blood group)                            | ns                 | -2.6   | ns     |
|   |   |   | LOC100506388 | uncharacterized LOC100506388                                           | ns                 | ns     | 2.6    |
|   |   |   | DIRAS2       | DIRAS family, GTP-binding RAS-like 2                                   | ns                 | -2.6   | ns     |
|   |   |   | SFMBT2       | Scm-like with four mbt domains 2                                       | ns                 | ns     | 2.6    |
|   |   |   | ATRNL        | attractin                                                              | ns                 | -2.6   | ns     |
|   |   |   | ARHGAP31     | Rho GTPase activating protein 31                                       | ns                 | -2.5   | ns     |
|   |   |   | IQCK         | IQ motif containing K                                                  | ns                 | ns     | 2.5    |
|   |   |   | DRAM1        | DNA-damage regulated autophagy modulator 1                             | ns                 | -2.5   | ns     |
|   |   |   | FKBP7        | FK506 binding protein 7                                                | ns                 | -2.5   | ns     |
|   |   |   | CHI3L1       | chitinase 3-like 1 (cartilage glycoprotein-39)                         | ns                 | -2.5   | ns     |
|   |   |   | SPSB1        | splA                                                                   | ns                 | -2.5   | ns     |
|   |   |   | CDC42EP5     | CDC42 effector protein (Rho GTPase binding) 5                          | ns                 | -2.5   | ns     |
|   |   |   | APOBEC3G     | apolipoprotein B mRNA editing enzyme, catalytic polypeptide-like 3G    | ns                 | -2.5   | ns     |
|   |   |   | TUBE1        | tubulin, epsilon 1                                                     | ns                 | -2.5   | ns     |
|   |   |   | TRAF5        | TNF receptor-associated factor 5                                       | ns                 | ns     | 2.5    |
|   |   |   | TCEAL1       | transcription elongation factor A (SII)-like 1                         | ns                 | -2.5   | ns     |
|   |   |   | ENDOG        | endonuclease G                                                         | ns                 | -2.5   | ns     |
|   |   |   | CRYAB        | crystallin alpha B                                                     | ns                 | ns     | 2.5    |
|   |   |   | PLBD2        | phospholipase B domain containing 2                                    | ns                 | -2.5   | ns     |

| S | C | E | Symbol       | Name                                                                                   | Linear Fold Change |        |        |
|---|---|---|--------------|----------------------------------------------------------------------------------------|--------------------|--------|--------|
|   |   |   |              |                                                                                        | S vs C             | S vs E | E vs C |
|   |   |   | PLXNB2       | plexin B2                                                                              | ns                 | -2.5   | ns     |
|   |   |   | CAPNS1       | calpain, small subunit 1                                                               | ns                 | -2.5   | ns     |
|   |   |   | CD300A       | CD300a molecule                                                                        | ns                 | -2.5   | ns     |
|   |   |   | HECTD2       | HECT domain containing E3 ubiquitin protein ligase 2                                   | ns                 | ns     | 2.5    |
|   |   |   | CCDC107      | coiled-coil domain containing 107                                                      | ns                 | -2.5   | ns     |
|   |   |   | HIF1A-AS2    | HIF1A antisense RNA 2                                                                  | ns                 | -2.5   | ns     |
|   |   |   | NPR2         | natriuretic peptide receptor 2                                                         | ns                 | ns     | 2.5    |
|   |   |   | RNF152       | ring finger protein 152                                                                | ns                 | ns     | 2.5    |
|   |   |   | CD84         | CD84 molecule                                                                          | ns                 | ns     | 2.5    |
|   |   |   | TST          | thiosulfate sulfurtransferase (rhodanese)                                              | ns                 | -2.5   | ns     |
|   |   |   | EID1         | EP300 interacting inhibitor of differentiation 1                                       | ns                 | ns     | 2.5    |
|   |   |   | TMEM176B     | transmembrane protein 176B                                                             | ns                 | -2.5   | ns     |
|   |   |   | RGS10        | regulator of G-protein signaling 10                                                    | ns                 | -2.5   | ns     |
|   |   |   | SOCS5        | suppressor of cytokine signaling 5                                                     | ns                 | ns     | 2.5    |
|   |   |   | SLC35B2      | solute carrier family 35 (adenosine 3-phospho 5-phosphosulfate transporter), member B2 | ns                 | -2.5   | ns     |
|   |   |   | LOC102724776 | uncharacterized LOC102724776                                                           | ns                 | ns     | 2.5    |
|   |   |   | CALHM5       | calcium homeostasis modulator family member 5                                          | ns                 | ns     | 2.5    |
|   |   |   | TFEC         | transcription factor EC                                                                | ns                 | ns     | 2.5    |
|   |   |   | ABCC1        | ATP binding cassette subfamily C member 1                                              | ns                 | -2.5   | ns     |
|   |   |   | PARVA        | parvin, alpha                                                                          | ns                 | -2.5   | ns     |
|   |   |   | VWCE         | von Willebrand factor C and EGF domains                                                | ns                 | -2.3   | ns     |
|   |   |   | TNS1         | tensin 1                                                                               | ns                 | ns     | 2.4    |
|   |   |   | WDR44        | WD repeat domain 44                                                                    | ns                 | -2.4   | ns     |
|   |   |   | GALC         | galactosylceramidase                                                                   | ns                 | -2.4   | ns     |
|   |   |   | ARL6         | ADP-ribosylation factor like GTPase 6                                                  | ns                 | ns     | 2.4    |
|   |   |   | CAVIN3       | caveolae associated protein 3                                                          | ns                 | ns     | 2.4    |
|   |   |   | PAPSS1       | 3-phosphoadenosine 5-phosphosulfate synthase 1                                         | ns                 | -2.4   | ns     |
|   |   |   | JOSD2        | Josephin domain containing 2                                                           | ns                 | -2.4   | ns     |
|   |   |   | ARHGAP20     | Rho GTPase activating protein 20                                                       | ns                 | ns     | 2.4    |
|   |   |   | TMEM219      | transmembrane protein 219                                                              | ns                 | -2.4   | ns     |
|   |   |   | FAM8A1       | family with sequence similarity 8, member A1                                           | ns                 | -2.4   | ns     |
|   |   |   | PGM2L1       | phosphoglucomutase 2-like 1                                                            | ns                 | -2.4   | ns     |
|   |   |   | CARD6        | caspase recruitment domain family, member 6                                            | ns                 | ns     | 2.4    |
|   |   |   | ZNF699       | zinc finger protein 699                                                                | ns                 | -2.4   | ns     |
|   |   |   | PCYOX1       | prenylcysteine oxidase 1                                                               | ns                 | -2.4   | ns     |
|   |   |   | DNAJC10      | DnaJ (Hsp40) homolog, subfamily C, member 10                                           | ns                 | -2.4   | ns     |
|   |   |   | C2           | complement component 2                                                                 | ns                 | ns     | 2.4    |
|   |   |   | ALPK2        | alpha kinase 2                                                                         | ns                 | -2.4   | ns     |
|   |   |   | CPEB2        | cytoplasmic polyadenylation element binding protein 2                                  | ns                 | -2.4   | ns     |
|   |   |   | IL17RA       | interleukin 17 receptor A                                                              | ns                 | -2.4   | ns     |
|   |   |   | RGS4         | regulator of G-protein signaling 4                                                     | ns                 | -2.4   | ns     |
|   |   |   | CTIF         | CBP80                                                                                  | ns                 | -2.4   | ns     |
|   |   |   | NMNAT1       | nicotinamide nucleotide adenyltransferase 1                                            | ns                 | ns     | 2.4    |
|   |   |   | PREPL        | prolyl endopeptidase-like                                                              | ns                 | ns     | 2.4    |
|   |   |   | TPGS2        | tubulin polyglutamylase complex subunit 2                                              | ns                 | -2.4   | ns     |
|   |   |   | TNS2         | tensin 2                                                                               | ns                 | ns     | 2.4    |
|   |   |   | ZBTB8A       | zinc finger and BTB domain containing 8A                                               | ns                 | -2.4   | ns     |
|   |   |   | TXNDC15      | thioredoxin domain containing 15                                                       | ns                 | -2.4   | ns     |
|   |   |   | CTSO         | cathepsin O                                                                            | ns                 | ns     | 2.4    |
|   |   |   | RGS5         | regulator of G-protein signaling 5                                                     | ns                 | ns     | 2.4    |
|   |   |   | UBE2D1       | ubiquitin conjugating enzyme E2D 1                                                     | ns                 | -2.4   | ns     |
|   |   |   | PLCD3        | phospholipase C, delta 3                                                               | ns                 | -2.4   | ns     |
|   |   |   | SELENOW      | selenoprotein W                                                                        | ns                 | -2.4   | ns     |
|   |   |   | UST          | uronyl-2-sulfotransferase                                                              | ns                 | ns     | 2.4    |
|   |   |   | ACTR1B       | ARP1 actin-related protein 1 homolog B, contractin beta (yeast)                        | ns                 | -2.4   | ns     |



| S | C | E | Symbol       | Name                                                                              | Linear Fold Change |        |        |
|---|---|---|--------------|-----------------------------------------------------------------------------------|--------------------|--------|--------|
|   |   |   |              |                                                                                   | S vs C             | S vs E | E vs C |
|   |   |   | LRRN4CL      | LRRN4 C-terminal like                                                             | ns                 | -2.4   | ns     |
|   |   |   | OTUD1        | OTU deubiquitinase 1                                                              | ns                 | -2.3   | ns     |
|   |   |   | LIG4         | ligase IV, DNA, ATP-dependent                                                     | ns                 | ns     | 2.3    |
|   |   |   | GLS          | glutaminase                                                                       | ns                 | -2.3   | ns     |
|   |   |   | THRA         | thyroid hormone receptor, alpha                                                   | ns                 | ns     | 2.3    |
|   |   |   | HLA-F        | major histocompatibility complex, class I, F                                      | ns                 | -2.3   | ns     |
|   |   |   | LOC100287042 | uncharacterized LOC100287042                                                      | ns                 | -2.3   | ns     |
|   |   |   | IFI35        | interferon-induced protein 35                                                     | ns                 | -2.3   | ns     |
|   |   |   | SLC39A6      | solute carrier family 39 (zinc transporter), member 6                             | ns                 | -2.3   | ns     |
|   |   |   | SLC66A3      | solute carrier family 66 member 3                                                 | ns                 | -2.3   | ns     |
|   |   |   | VKORC1       | vitamin K epoxide reductase complex subunit 1                                     | ns                 | -2.3   | ns     |
|   |   |   | LNPK         | lunapark, ER junction formation factor                                            | ns                 | -2.3   | ns     |
|   |   |   | LRR6         | leucine rich repeat containing 6                                                  | ns                 | ns     | 2.3    |
|   |   |   | MX2          | MX dynamin-like GTPase 2                                                          | ns                 | -2.3   | ns     |
|   |   |   | GYPC         | glycophorin C (Gerbich blood group)                                               | ns                 | ns     | 2.3    |
|   |   |   | SS18L2       | synovial sarcoma translocation gene on chromosome 18-like 2                       | ns                 | -2.3   | ns     |
|   |   |   | ODF3B        | outer dense fiber of sperm tails 3B                                               | ns                 | -2.3   | ns     |
|   |   |   | CA11         | carbonic anhydrase XI                                                             | ns                 | -2.3   | ns     |
|   |   |   | LOC100996842 | uncharacterized LOC100996842                                                      | ns                 | -2.3   | ns     |
|   |   |   | WASHC3       | WASH complex subunit 3                                                            | ns                 | -2.3   | ns     |
|   |   |   | LOC102724094 | uncharacterized LOC102724094                                                      | ns                 | -2.3   | ns     |
|   |   |   | OAF          | out at first homolog                                                              | ns                 | -2.3   | ns     |
|   |   |   | FTH1         | ferritin, heavy polypeptide 1                                                     | ns                 | -2.3   | ns     |
|   |   |   | TTC39B       | tetratricopeptide repeat domain 39B                                               | ns                 | ns     | 2.3    |
|   |   |   | SLC9B2       | solute carrier family 9, subfamily B (NHA2, cation proton antiporter 2), member 2 | ns                 | ns     | 2.3    |
|   |   |   | P4HA2        | prolyl 4-hydroxylase, alpha polypeptide II                                        | ns                 | -2.3   | ns     |
|   |   |   | INHBB        | inhibin beta B                                                                    | ns                 | -2.3   | ns     |
|   |   |   | ACAT1        | acetyl-CoA acetyltransferase 1                                                    | ns                 | ns     | 2.3    |
|   |   |   | ATP6V0E1     | ATPase, H <sup>+</sup> transporting, lysosomal 9kDa, V0 subunit e1                | ns                 | -2.3   | ns     |
|   |   |   | TMEM204      | transmembrane protein 204                                                         | ns                 | ns     | 2.3    |
|   |   |   | RAMP1        | receptor (G protein-coupled) activity modifying protein 1                         | ns                 | -2.3   | ns     |
|   |   |   | RGS16        | regulator of G-protein signaling 16                                               | ns                 | -2.3   | ns     |
|   |   |   | ZNF562       | zinc finger protein 562                                                           | ns                 | -2.3   | ns     |
|   |   |   | DDAH1        | dimethylarginine dimethylaminohydrolase 1                                         | ns                 | ns     | 2.3    |
|   |   |   | MIR3622A     | microRNA 3622a                                                                    | ns                 | -2.3   | ns     |
|   |   |   | LY86         | lymphocyte antigen 86                                                             | ns                 | -2.3   | ns     |
|   |   |   | POLR2I       | polymerase (RNA) II (DNA directed) polypeptide I, 14.5kDa                         | ns                 | -2.3   | ns     |
|   |   |   | S100A4       | S100 calcium binding protein A4                                                   | ns                 | -2.3   | ns     |
|   |   |   | ERGIC1       | endoplasmic reticulum-golgi intermediate compartment 1                            | ns                 | -2.3   | ns     |
|   |   |   | RUNX3        | runt-related transcription factor 3                                               | ns                 | ns     | 2.3    |
|   |   |   | ZNF330       | zinc finger protein 330                                                           | ns                 | ns     | 2.3    |
|   |   |   | PSMB9        | proteasome subunit beta 9                                                         | ns                 | -2.3   | ns     |
|   |   |   | KIR2DS4      | killer cell immunoglobulin-like receptor, two domains, short cytoplasmic tail, 4  | ns                 | ns     | 2.3    |
|   |   |   | SOCS3        | suppressor of cytokine signaling 3                                                | ns                 | -2.2   | ns     |
|   |   |   | C1GALT1C1    | C1GALT1 specific chaperone 1                                                      | ns                 | -2.2   | ns     |
|   |   |   | DECR1        | 2,4-dienoyl-CoA reductase 1, mitochondrial                                        | ns                 | ns     | 2.2    |
|   |   |   | TPRG1L       | tumor protein p63 regulated 1-like                                                | ns                 | -2.2   | ns     |
|   |   |   | MAP1A        | microtubule associated protein 1A                                                 | ns                 | -2.2   | ns     |
|   |   |   | TCTA         | T-cell leukemia translocation altered                                             | ns                 | ns     | 2.2    |
|   |   |   | DNASE2       | deoxyribonuclease II, lysosomal                                                   | ns                 | -2.2   | ns     |
|   |   |   | ARL2BP       | ADP-ribosylation factor like GTPase 2 binding protein                             | ns                 | ns     | 2.2    |
|   |   |   | CELF2-AS1    | CELF2 antisense RNA 1                                                             | ns                 | -2.2   | ns     |
|   |   |   | CYTIP        | cytohesin 1 interacting protein                                                   | ns                 | -2.2   | ns     |
|   |   |   | HHEX         | hematopoietically expressed homeobox                                              | ns                 | ns     | 2.2    |
|   |   |   | THBS3        | thrombospondin 3                                                                  | ns                 | -2.2   | ns     |

| S | C | E | Symbol   | Name                                                                             | Linear Fold Change |        |        |
|---|---|---|----------|----------------------------------------------------------------------------------|--------------------|--------|--------|
|   |   |   |          |                                                                                  | S vs C             | S vs E | E vs C |
|   |   |   | TEX2     | testis expressed 2                                                               | ns                 | -2.2   | ns     |
|   |   |   | RNF130   | ring finger protein 130                                                          | ns                 | ns     | 2.2    |
|   |   |   | FAM20A   | family with sequence similarity 20, member A                                     | ns                 | -2.2   | ns     |
|   |   |   | POT1-AS1 | POT1 antisense RNA 1                                                             | ns                 | -2.2   | ns     |
|   |   |   | STAT3    | signal transducer and activator of transcription 3 (acute-phase response factor) | ns                 | -2.2   | ns     |
|   |   |   | SIAE     | sialic acid acetyltransferase                                                    | ns                 | -2.2   | ns     |
|   |   |   | AHNAK2   | AHNAK nucleoprotein 2                                                            | ns                 | -2.2   | ns     |
|   |   |   | KLHL2    | kelch-like family member 2                                                       | ns                 | -2.2   | ns     |
|   |   |   | ZYX      | zyxin                                                                            | ns                 | -2.2   | ns     |
|   |   |   | ZNHIT1   | zinc finger, HIT-type containing 1                                               | ns                 | -2.2   | ns     |
|   |   |   | LTA4H    | leukotriene A4 hydrolase                                                         | ns                 | -2.2   | ns     |
|   |   |   | SLC37A3  | solute carrier family 37, member 3                                               | ns                 | -2.2   | ns     |
|   |   |   | TNXA     | tenascin XA (pseudogene)                                                         | ns                 | ns     | 2.2    |
|   |   |   | GGT3P    | gamma-glutamyltransferase 3 pseudogene                                           | ns                 | ns     | 2.2    |
|   |   |   | ETHE1    | ethylmalonic encephalopathy 1                                                    | ns                 | -2.2   | ns     |
|   |   |   | TWIST2   | twist family bHLH transcription factor 2                                         | ns                 | -2.2   | ns     |
|   |   |   | TUSC2    | tumor suppressor candidate 2                                                     | ns                 | -2.2   | ns     |
|   |   |   | LITAF    | lipopolysaccharide-induced TNF factor                                            | ns                 | -2.2   | ns     |
|   |   |   | FKBP1B   | FK506 binding protein 1B                                                         | ns                 | -2.2   | ns     |
|   |   |   | AKAP12   | A kinase (PRKA) anchor protein 12                                                | ns                 | -2.2   | ns     |
|   |   |   | LY6D     | lymphocyte antigen 6 complex, locus D                                            | ns                 | -2.2   | ns     |
|   |   |   | LHFPL6   | LHFPL tetraspan subfamily member 6                                               | ns                 | -2.2   | ns     |
|   |   |   | ASL      | argininosuccinate lyase                                                          | ns                 | -2.2   | ns     |
|   |   |   | KREMEN1  | kringle containing transmembrane protein 1                                       | ns                 | -2.2   | ns     |
|   |   |   | PROCR    | protein C receptor, endothelial                                                  | ns                 | -2.2   | ns     |
|   |   |   | MARCHF2  | membrane associated ring-CH-type finger 2                                        | ns                 | -2.2   | ns     |
|   |   |   | TWF2     | twinfilin actin binding protein 2                                                | ns                 | -2.2   | ns     |
|   |   |   | ADD3     | adducin 3 (gamma)                                                                | ns                 | ns     | 2.2    |
|   |   |   | ZBTB16   | zinc finger and BTB domain containing 16                                         | ns                 | -2.2   | ns     |
|   |   |   | RAB31    | RAB31, member RAS oncogene family                                                | ns                 | ns     | 2.2    |
|   |   |   | IL17RE   | interleukin 17 receptor E                                                        | ns                 | -2.1   | ns     |
|   |   |   | FUNDC1   | FUN14 domain containing 1                                                        | ns                 | -2.2   | ns     |
|   |   |   | H6PD     | hexose-6-phosphate dehydrogenase (glucose 1-dehydrogenase)                       | ns                 | -2.2   | ns     |
|   |   |   | SPOCK2   | sparc                                                                            | ns                 | -2.2   | ns     |
|   |   |   | CLSTN2   | calsyntenin 2                                                                    | ns                 | -2.2   | ns     |
|   |   |   | LGALS3   | lectin, galactoside-binding, soluble, 3                                          | ns                 | -2.2   | ns     |
|   |   |   | MED11    | mediator complex subunit 11                                                      | ns                 | -2.2   | ns     |
|   |   |   | ABR      | active BCR-related                                                               | ns                 | -2.2   | ns     |
|   |   |   | GNA15    | guanine nucleotide binding protein (G protein), alpha 15 (Gq class)              | ns                 | -2.1   | ns     |
|   |   |   | ITGA3    | integrin alpha 3                                                                 | ns                 | -2.1   | ns     |
|   |   |   | CASP1    | caspase 1                                                                        | ns                 | ns     | 2.1    |
|   |   |   | MR1      | major histocompatibility complex, class I-related                                | ns                 | -2.1   | ns     |
|   |   |   | STX2     | syntaxin 2                                                                       | ns                 | ns     | 2.1    |
|   |   |   | GPR4     | G protein-coupled receptor 4                                                     | ns                 | ns     | 2.1    |
|   |   |   | ABCA1    | ATP binding cassette subfamily A member 1                                        | ns                 | -2.1   | ns     |
|   |   |   | CYP2U1   | cytochrome P450, family 2, subfamily U, polypeptide 1                            | ns                 | -2.1   | ns     |
|   |   |   | CYTH4    | cytohesin 4                                                                      | ns                 | ns     | 2.1    |
|   |   |   | FKBP10   | FK506 binding protein 10                                                         | ns                 | -2.1   | ns     |
|   |   |   | LRRC37A3 | leucine rich repeat containing 37, member A3                                     | ns                 | -2.1   | ns     |
|   |   |   | SLCO3A1  | solute carrier organic anion transporter family, member 3A1                      | ns                 | -2.1   | ns     |
|   |   |   | TRG-AS1  | T cell receptor gamma locus antisense RNA 1                                      | ns                 | -2.1   | ns     |
|   |   |   | ODF2L    | outer dense fiber of sperm tails 2-like                                          | ns                 | -2.1   | ns     |
|   |   |   | LMAN2    | lectin, mannose-binding 2                                                        | ns                 | -2.1   | ns     |
|   |   |   | IRF9     | interferon regulatory factor 9                                                   | ns                 | -2.0   | ns     |
|   |   |   | CAPN5    | calpain 5                                                                        | ns                 | -2.1   | ns     |

| S | C | E | Symbol       | Name                                                                              | Linear Fold Change |        |        |
|---|---|---|--------------|-----------------------------------------------------------------------------------|--------------------|--------|--------|
|   |   |   |              |                                                                                   | S vs C             | S vs E | E vs C |
|   |   |   | NFASC        | neurofascin                                                                       | ns                 | -2.1   | ns     |
|   |   |   | METTL24      | methyltransferase like 24                                                         | ns                 | ns     | 2.1    |
|   |   |   | SNHG16       | small nucleolar RNA host gene 16                                                  | ns                 | -2.1   | ns     |
|   |   |   | PPP1R7       | protein phosphatase 1, regulatory subunit 7                                       | ns                 | -2.1   | ns     |
|   |   |   | MFSD6        | major facilitator superfamily domain containing 6                                 | ns                 | ns     | 2.1    |
|   |   |   | METTL23      | methyltransferase like 23                                                         | ns                 | -2.1   | ns     |
|   |   |   | HOXA5        | homeobox A5                                                                       | ns                 | -2.1   | ns     |
|   |   |   | SLC31A1      | solute carrier family 31 (copper transporter), member 1                           | ns                 | -2.1   | ns     |
|   |   |   | TNFRSF21     | tumor necrosis factor receptor superfamily, member 21                             | ns                 | -2.1   | ns     |
|   |   |   | SPIRE1       | spire-type actin nucleation factor 1                                              | ns                 | -2.1   | ns     |
|   |   |   | HLA-DQB2     | major histocompatibility complex, class II, DQ beta 2                             | ns                 | -2.1   | ns     |
|   |   |   | BLOC1S6      | biogenesis of lysosomal organelles complex-1, subunit 6, pallidin                 | ns                 | -2.1   | ns     |
|   |   |   | CNTN4        | contactin 4                                                                       | ns                 | ns     | 2.1    |
|   |   |   | CARS1        | cysteinyl-tRNA synthetase 1                                                       | ns                 | -2.1   | ns     |
|   |   |   | GPBAR1       | G protein-coupled bile acid receptor 1                                            | ns                 | -2.1   | ns     |
|   |   |   | LOC100506928 | uncharacterized LOC100506928                                                      | ns                 | -2.1   | ns     |
|   |   |   | SLA          | Src-like-adaptor                                                                  | ns                 | ns     | 2.1    |
|   |   |   | FAM98C       | family with sequence similarity 98, member C                                      | ns                 | -2.1   | ns     |
|   |   |   | BBS5         | Bardet-Biedl syndrome 5                                                           | ns                 | ns     | 2.1    |
|   |   |   | FZD8         | frizzled class receptor 8                                                         | ns                 | -2.1   | ns     |
|   |   |   | SMAP2        | small ArfGAP2                                                                     | ns                 | ns     | 2.1    |
|   |   |   | CYB5R3       | cytochrome b5 reductase 3                                                         | ns                 | -2.1   | ns     |
|   |   |   | DST          | dystonin                                                                          | ns                 | ns     | 2.1    |
|   |   |   | OXLD1        | oxidoreductase-like domain containing 1                                           | ns                 | -2.1   | ns     |
|   |   |   | LEPROTL1     | leptin receptor overlapping transcript-like 1                                     | ns                 | -2.1   | ns     |
|   |   |   | TAP2         | transporter 2, ATP-binding cassette, sub-family B (MDR                            | ns                 | -2.1   | ns     |
|   |   |   | IGF2R        | insulin-like growth factor 2 receptor                                             | ns                 | -2.1   | ns     |
|   |   |   | POLR2L       | polymerase (RNA) II (DNA directed) polypeptide L, 7.6kDa                          | ns                 | -2.1   | ns     |
|   |   |   | ZNF189       | zinc finger protein 189                                                           | ns                 | ns     | 2.1    |
|   |   |   | MASP1        | mannan-binding lectin serine peptidase 1 (C4                                      | ns                 | -2.1   | ns     |
|   |   |   | CDK14        | cyclin-dependent kinase 14                                                        | ns                 | ns     | 2.1    |
|   |   |   | RASGRP2      | RAS guanyl releasing protein 2 (calcium and DAG-regulated)                        | ns                 | ns     | 2.1    |
|   |   |   | KIR3DL1      | killer cell immunoglobulin-like receptor, three domains, long cytoplasmic tail, 1 | ns                 | ns     | 2.1    |
|   |   |   | FITM2        | fat storage-inducing transmembrane protein 2                                      | ns                 | -2.1   | ns     |
|   |   |   | RNLS         | renalase, FAD-dependent amine oxidase                                             | ns                 | ns     | 2.1    |
|   |   |   | B2M          | beta-2-microglobulin                                                              | ns                 | -2.1   | ns     |
|   |   |   | ACYP2        | acylphosphatase 2, muscle type                                                    | ns                 | ns     | 2.1    |
|   |   |   | RRN3P2       | RRN3 homolog, RNA polymerase I transcription factor pseudogene 2                  | ns                 | ns     | 2.1    |
|   |   |   | SLCO2B1      | solute carrier organic anion transporter family, member 2B1                       | ns                 | ns     | 2.1    |
|   |   |   | CHST3        | carbohydrate (chondroitin 6) sulfotransferase 3                                   | ns                 | -2.1   | ns     |
|   |   |   | LYSMD2       | LysM, putative peptidoglycan-binding, domain containing 2                         | ns                 | ns     | 2.0    |
|   |   |   | NBN          | nibrin                                                                            | ns                 | -2.0   | ns     |
|   |   |   | ME2          | malic enzyme 2, NAD(+)-dependent, mitochondrial                                   | ns                 | -2.0   | ns     |
|   |   |   | ACE          | angiotensin I converting enzyme                                                   | ns                 | ns     | 2.0    |
|   |   |   | ABHD2        | abhydrolase domain containing 2                                                   | ns                 | -2.0   | ns     |
|   |   |   | ENDOD1       | endonuclease domain containing 1                                                  | ns                 | -2.0   | ns     |
|   |   |   | MPC1         | mitochondrial pyruvate carrier 1                                                  | ns                 | -2.0   | ns     |
|   |   |   | FKBP11       | FK506 binding protein 11                                                          | ns                 | -2.0   | ns     |
|   |   |   | SASH3        | SAM and SH3 domain containing 3                                                   | ns                 | ns     | 2.0    |
|   |   |   | RNASEH2C     | ribonuclease H2, subunit C                                                        | ns                 | ns     | 2.0    |
|   |   |   | PDCL3        | phosducin like 3                                                                  | ns                 | -2.0   | ns     |
|   |   |   | RDH10        | retinol dehydrogenase 10 (all-trans)                                              | ns                 | ns     | 2.0    |
|   |   |   | RAB29        | RAB29, member RAS oncogene family                                                 | ns                 | -2.0   | ns     |
|   |   |   | ATL3         | atlastin GTPase 3                                                                 | ns                 | -2.0   | ns     |
|   |   |   | EIF2AK3      | eukaryotic translation initiation factor 2-alpha kinase 3                         | ns                 | -2.0   | ns     |

| S | C | E | Symbol       | Name                                                 | Linear Fold Change |           |           |
|---|---|---|--------------|------------------------------------------------------|--------------------|-----------|-----------|
|   |   |   |              |                                                      | S vs C             | S vs E    | E vs C    |
|   |   |   | LOC105376958 | uncharacterized LOC105376958                         | <i>ns</i>          | -2.0      | <i>ns</i> |
|   |   |   | RASSF4       | Ras association (RalGDS                              | <i>ns</i>          | <i>ns</i> | 2.0       |
|   |   |   | ST6GAL1      | ST6 beta-galactosamide alpha-2,6-sialyltransferase 1 | <i>ns</i>          | <i>ns</i> | 2.0       |
|   |   |   | SAP30        | Sin3A associated protein 30kDa                       | <i>ns</i>          | -2.0      | <i>ns</i> |
|   |   |   | THYN1        | thymocyte nuclear protein 1                          | <i>ns</i>          | -2.0      | <i>ns</i> |
|   |   |   | YBEY         | ybeY metalloproteinase (putative)                    | <i>ns</i>          | -2.0      | <i>ns</i> |
|   |   |   | CD151        | CD151 molecule (Raph blood group)                    | <i>ns</i>          | -2.0      | <i>ns</i> |
|   |   |   | DSTN         | destrin (actin depolymerizing factor)                | <i>ns</i>          | -2.0      | <i>ns</i> |
|   |   |   | ADGRG3       | adhesion G protein-coupled receptor G3               | <i>ns</i>          | <i>ns</i> | 2.0       |
|   |   |   | PNMA1        | paraneoplastic Ma antigen 1                          | <i>ns</i>          | -2.0      | <i>ns</i> |
|   |   |   | CFAP36       | cilia and flagella associated protein 36             | <i>ns</i>          | -2.0      | <i>ns</i> |
|   |   |   | SAPCD1-AS1   | SAPCD1 antisense RNA 1                               | <i>ns</i>          | -2.0      | <i>ns</i> |
|   |   |   | PRICKLE2-AS1 | PRICKLE2 antisense RNA 1                             | <i>ns</i>          | <i>ns</i> | 2.0       |
|   |   |   | SDC3         | syndecan 3                                           | <i>ns</i>          | -2.0      | <i>ns</i> |
|   |   |   | GOLM1        | golgi membrane protein 1                             | <i>ns</i>          | <i>ns</i> | 2.0       |
|   |   |   | PDE4A        | phosphodiesterase 4A, cAMP-specific                  | <i>ns</i>          | -2.0      | <i>ns</i> |

(*ns*=no significant difference)

RMA log<sub>2</sub>  
-5x x 5x

**Fig. S2.** Syncytiotrophoblast (**S**), Cytotrophoblast (**C**), and Endovascular trophoblast (**E**) differentially expressed genes



| RNA |   |   | Protein |   |   | Symbol     | Name                                                              | Linear Fold Change |     |     |         |     |      |
|-----|---|---|---------|---|---|------------|-------------------------------------------------------------------|--------------------|-----|-----|---------|-----|------|
| S   | C | E | S       | C | E |            |                                                                   | RNA                |     |     | Protein |     |      |
|     |   |   |         |   |   |            |                                                                   | SvC                | SvE | EvC | SvC     | SvE | EvC  |
|     |   |   |         |   |   | GH2        | growth hormone 2                                                  | 12                 | 65  | -6  | 7       | 42  | -6   |
|     |   |   |         |   |   | CSHL1      | chorionic somatomammotropin hormone-like 1                        | 7                  | 5   | -5  | 3       | 7   | -3   |
|     |   |   |         |   |   | KMO        | kynurenine 3-monooxygenase                                        | 5                  | 5   | -5  | 2       | 10  | -6   |
|     |   |   |         |   |   | GPC3       | glypican 3                                                        | 3                  | 4   | -6  | -5      | -4  | -1   |
|     |   |   |         |   |   | HSD11B2    | hydroxysteroid (11-beta) dehydrogenase 2                          | 4                  | 3   | -3  | 19      | 58  | -3   |
|     |   |   |         |   |   | PSG3       | pregnancy specific beta-1-glycoprotein 3                          | 2                  | 3   | -3  | -54     | -32 | -2   |
|     |   |   |         |   |   | C4orf36    | chromosome 4 open reading frame 36                                | 4                  | 3   | -2  | 159     | 13  | 12   |
|     |   |   |         |   |   | CKMT1A     | creatine kinase, mitochondrial 1A                                 | 3                  | 2   | -1  | 10      | 12  | -1   |
|     |   |   |         |   |   | CA8        | carbonic anhydrase VIII                                           | 4                  | 2   | 1   | 4       | 9   | -3   |
|     |   |   |         |   |   | FURIN      | furin (paired basic amino acid cleaving enzyme)                   | 3                  | 2   | -1  | 1       | 8   | -6   |
|     |   |   |         |   |   | AK3        | adenylate kinase 3                                                | 3                  | 1   | 1   | 135     | -1  | 148  |
|     |   |   |         |   |   | ELK1       | ELK1, member of ETS oncogene family                               | 2                  | 1   | -1  | 3       | 23  | -9   |
|     |   |   |         |   |   | IL1RAP     | interleukin 1 receptor accessory protein                          | -5                 | 1   | -2  | -1      | 7   | -7   |
|     |   |   |         |   |   | NOCT       | nocturnin                                                         | -3                 | 0   | -3  | 1       | 10  | -7   |
|     |   |   |         |   |   | GPR82      | G protein-coupled receptor 82                                     | -1                 | 3   | 8   | 35      | -1  | 44   |
|     |   |   |         |   |   | RBP1       | retinol binding protein 1, cellular                               | -2                 | 3   | 3   | 64      | 2   | 28   |
|     |   |   |         |   |   | C1QB       | complement component 1, q subcomponent, B chain                   | -1                 | 2   | 4   | 18      | -1  | 21   |
|     |   |   |         |   |   | CXCL11     | chemokine (C-X-C motif) ligand 11                                 | -1                 | 2   | 3   | -99     | -25 | -4   |
|     |   |   |         |   |   | FBLN2      | fibulin 2                                                         | -1                 | 2   | 2   | -7      | -11 | 1    |
|     |   |   |         |   |   | BMP5       | bone morphogenetic protein 5                                      | 4                  | 6   | -21 | 2       | 62  | -28  |
|     |   |   |         |   |   | CYP19A1    | cytochrome P450, family 19, subfamily A, polypeptide 1            | 2                  | 6   | -29 | 5       | 6   | -1   |
|     |   |   |         |   |   | HSD3B1     | isomerase 1                                                       | 2                  | 5   | -13 | 6       | 30  | -5   |
|     |   |   |         |   |   | DLK1       | delta-like 1 homolog (Drosophila)                                 | 2                  | 4   | -10 | -6      | -3  | -2   |
|     |   |   |         |   |   | CDO1       | cysteine dioxygenase type 1                                       | 2                  | 4   | -10 | 40      | 2   | 22   |
|     |   |   |         |   |   | OLAH       | oleoyl-ACP hydrolase                                              | 2                  | 4   | -6  | -1      | 21  | -26  |
|     |   |   |         |   |   | STS        | steroid sulfatase (microsomal), isozyme S                         | 2                  | 4   | -6  | 11      | 10  | 1    |
|     |   |   |         |   |   | ADAMTS6    | ADAM metalloproteinase with thrombospondin type S6                | 2                  | 4   | -5  | -7      | -2  | -3   |
|     |   |   |         |   |   | ATP6V1C2   | ATPase, H+ transporting, lysosomal 42kDa, V1C2                    | 2                  | 3   | -6  | 4       | 6   | -2   |
|     |   |   |         |   |   | PSG1       | pregnancy specific beta-1-glycoprotein 1                          | 2                  | 3   | -4  | -2      | 64  | -100 |
|     |   |   |         |   |   | SPDYA      | speedy                                                            | 1                  | 3   | -5  | 64      | 3   | 19   |
|     |   |   |         |   |   | SLC38A1    | solute carrier family 38, member 1                                | 1                  | 2   | -3  | 42      | 2   | 17   |
|     |   |   |         |   |   | SLC2A1     | solute carrier family 2A1 (facilitated glucose transporter)       | -1                 | 2   | -4  | 2       | 7   | -4   |
|     |   |   |         |   |   | CLN3       | ceroid-lipofuscinosis, neuronal 3                                 | -1                 | 1   | -4  | 28      | 2   | 18   |
|     |   |   |         |   |   | SLC29A1    | solute carrier family 29A1 (equilibrative nucleoside transporter) | -2                 | 1   | -4  | -13     | -17 | 1    |
|     |   |   |         |   |   | UBE2C      | ubiquitin-conjugating enzyme E2C                                  | 1                  | 1   | -2  | 93      | 8   | 12   |
|     |   |   |         |   |   | ADK        | adenosine kinase                                                  | -1                 | 1   | -2  | 2       | 82  | -45  |
|     |   |   |         |   |   | ZNF808     | zinc finger protein 808                                           | 1                  | 1   | -2  | -1      | 118 | -119 |
|     |   |   |         |   |   | PRG2       | proteoglycan 2, bone marrow (natural killer cell activator)       | -66                | 6   | 1   | -10     | -7  | -1   |
|     |   |   |         |   |   | ISG15      | ISG15 ubiquitin-like modifier                                     | -12                | 4   | 1   | -2      | 23  | -40  |
|     |   |   |         |   |   | HSPG2      | heparan sulfate proteoglycan 2                                    | -12                | 3   | -1  | -9      | -4  | -2   |
|     |   |   |         |   |   | RFPL4B     | ret finger protein-like 4B                                        | -8                 | 3   | 1   | 1241    | 3   | 475  |
|     |   |   |         |   |   | FN1        | fibronectin 1                                                     | -7                 | 2   | -1  | -35     | -11 | -3   |
|     |   |   |         |   |   | IFIT1      | interferon-induced protein with tetratricopeptide repeats 1       | -5                 | 3   | 1   | -6      | -4  | -2   |
|     |   |   |         |   |   | CD276      | CD276 molecule                                                    | -5                 | 2   | -1  | -70     | -9  | -8   |
|     |   |   |         |   |   | LAYN       | layilin                                                           | -3                 | 2   | 2   | 2       | 40  | -21  |
|     |   |   |         |   |   | ST6GALNAC2 | ST6 N-Acetylgalactosaminide Alpha-2,6-Sialyltransferase 2         | -4                 | 2   | 1   | -6      | 2   | -15  |
|     |   |   |         |   |   | KRT19      | keratin 19, type I                                                | -4                 | 1   | -2  | -1      | 4   | -5   |
|     |   |   |         |   |   | LY6K       | lymphocyte antigen 6 complex, locus K                             | -4                 | 1   | -2  | -116    | -36 | -3   |
|     |   |   |         |   |   | FHL2       | four and a half LIM domains 2                                     | -3                 | 1   | -1  | -40     | -44 | 1    |
|     |   |   |         |   |   | FAM110A    | family with sequence similarity 110, member A                     | -3                 | 1   | -1  | -3      | 18  | -52  |
|     |   |   |         |   |   | GTPBP1     | GTP binding protein 1                                             | -2                 | 1   | 1   | -2      | 3   | -6   |
|     |   |   |         |   |   | ADAM15     | ADAM metalloproteinase domain 15                                  | -2                 | 1   | -1  | -6      | 8   | -47  |
|     |   |   |         |   |   | LASP1      | LIM and SH3 protein 1                                             | -2                 | 1   | 1   | 23      | -1  | 31   |

| RNA |   |   | Protein |   |   | Symbol   | Name                                                                     | Linear Fold Change |     |     |         |      |      |
|-----|---|---|---------|---|---|----------|--------------------------------------------------------------------------|--------------------|-----|-----|---------|------|------|
| S   | C | E | S       | C | E |          |                                                                          | RNA                |     |     | Protein |      |      |
|     |   |   |         |   |   |          |                                                                          | SvC                | SvE | EvC | SvC     | SvE  | EvC  |
|     |   |   |         |   |   | ACTA2    | actin, alpha 2, smooth muscle, aorta                                     | 4                  | 0   | 5   | 4       | 1763 | -397 |
|     |   |   |         |   |   | IDO1     | indoleamine 2,3-dioxygenase 1                                            | 4                  | 0   | 5   | 59      | 3    | 17   |
|     |   |   |         |   |   | TCF4     | transcription factor 4                                                   | 4                  | 0   | 4   | 2       | 7    | -4   |
|     |   |   |         |   |   | EAF2     | ELL associated factor 2                                                  | 3                  | 0   | 3   | 35      | 3    | 12   |
|     |   |   |         |   |   | PSG11    | pregnancy specific beta-1-glycoprotein 11                                | 2                  | 3   | -3  | 5       | 45   | -9   |
|     |   |   |         |   |   | GH1      | growth hormone 1                                                         | 2                  | 2   | -2  | 138     | 138  | -1   |
|     |   |   |         |   |   | PBK      | PDZ binding kinase                                                       | 1                  | 2   | -3  | 113     | 10   | 11   |
|     |   |   |         |   |   | RBMS3    | RNA binding motif, single stranded interacting protein 3                 | 2                  | 2   | -2  | 5       | 94   | -20  |
|     |   |   |         |   |   | TFRC     | transferrin receptor                                                     | 2                  | 2   | -2  | 8       | 12   | -1   |
|     |   |   |         |   |   | NPIP4    | nuclear pore complex interacting protein family B4                       | 2                  | 2   | -2  | 66      | 11   | 6    |
|     |   |   |         |   |   | DVL3     | dishevelled segment polarity protein 3                                   | 2                  | 2   | -2  | 4       | 8    | -2   |
|     |   |   |         |   |   | STX3     | syntaxin 3                                                               | 2                  | 2   | -2  | 2       | 45   | -22  |
|     |   |   |         |   |   | PDXDC2P  | pyridoxal-dependent decarboxylase domain containing 2, pseudogene        | 1                  | 2   | -2  | 25      | 3    | 9    |
|     |   |   |         |   |   | BTG2     | BTG family, member 2                                                     | 3                  | 1   | 1   | 5       | 30   | -6   |
|     |   |   |         |   |   | BCL2     | B-cell CLL                                                               | 3                  | 1   | 1   | 2       | 5    | -3   |
|     |   |   |         |   |   | AUNIP    | aurora kinase A and ninein interacting protein                           | 2                  | 2   | -2  | 10      | 5    | 2    |
|     |   |   |         |   |   | TOMM34   | translocase of outer mitochondrial membrane 34                           | 1                  | 2   | -2  | 30      | -2   | 63   |
|     |   |   |         |   |   | RGPD3    | RANBP2-like and GRIP domain containing 3                                 | 1                  | 1   | -2  | 2       | 67   | -38  |
|     |   |   |         |   |   | H2BC21   | H2B clustered histone 21                                                 | 1                  | 1   | -2  | 3       | 5    | -2   |
|     |   |   |         |   |   | SLAIN1   | SLAIN motif family member 1                                              | 3                  | 1   | 2   | -1      | 7    | -8   |
|     |   |   |         |   |   | SLC2A11  | solute carrier family 2A11 (facilitated glucose transporter)             | 1                  | 1   | -2  | -2      | 26   | -54  |
|     |   |   |         |   |   | TAF4B    | TATA-Box Binding Protein Associated Factor 4b                            | 1                  | 1   | -2  | 2       | 13   | -6   |
|     |   |   |         |   |   | MGST3    | microsomal glutathione S-transferase 3                                   | 1                  | 1   | -2  | 12      | 2    | 6    |
|     |   |   |         |   |   | TIGD2    | tigger transposable element derived 2                                    | 1                  | 1   | -2  | 2       | 11   | -7   |
|     |   |   |         |   |   | SIAH2    | siah E3 ubiquitin protein ligase 2                                       | 2                  | 1   | -1  | 37      | 2    | 24   |
|     |   |   |         |   |   | TLK1     | tousled-like kinase 1                                                    | 1                  | 1   | -2  | 40      | 1    | 31   |
|     |   |   |         |   |   | HNRNPD   | heterogeneous nuclear ribonucleoprotein D                                | 1                  | 1   | -2  | 118     | 8    | 15   |
|     |   |   |         |   |   | NPIA5    | nuclear pore complex interacting protein family A5                       | 2                  | 1   | -1  | 35      | 35   | -1   |
|     |   |   |         |   |   | TCTEX1D4 | Tctex1 domain containing 4                                               | 1                  | 1   | -2  | 2       | 28   | -15  |
|     |   |   |         |   |   | PGPEP1   | pyroglutamyl-peptidase I                                                 | -4                 | 1   | -2  | -150    | -34  | -4   |
|     |   |   |         |   |   | PANX1    | pannexin 1                                                               | -3                 | 1   | -2  | -108    | -17  | -7   |
|     |   |   |         |   |   | ELF4     | E74-like factor 4 (ets domain transcription factor)                      | -3                 | 1   | -2  | -1      | 23   | -34  |
|     |   |   |         |   |   | RAB25    | RAB25, member RAS oncogene family                                        | -1                 | 1   | -3  | 2       | 47   | -21  |
|     |   |   |         |   |   | CYB5R1   | cytochrome b5 reductase 1                                                | -1                 | 1   | -2  | 5       | 152  | -29  |
|     |   |   |         |   |   | ACVR2B   | activin A receptor type IIB                                              | -1                 | 1   | -2  | -36     | -17  | -2   |
|     |   |   |         |   |   | TM4SF5   | transmembrane 4 L six family member 5                                    | -3                 | 3   | 2   | 57      | 2    | 27   |
|     |   |   |         |   |   | GPR65    | G protein-coupled receptor 65                                            | 1                  | 2   | 5   | 133     | 2    | 68   |
|     |   |   |         |   |   | CD82     | CD82 molecule                                                            | -1                 | 2   | 4   | 23      | -2   | 50   |
|     |   |   |         |   |   | PLEK     | pleckstrin                                                               | 2                  | 1   | 4   | -129    | -45  | -3   |
|     |   |   |         |   |   | GDAP1    | ganglioside induced differentiation associated protein 1                 | 2                  | 1   | 4   | 45      | 1    | 33   |
|     |   |   |         |   |   | SLC30A4  | solute carrier family 30 (zinc transporter), member 4                    | -3                 | 2   | 1   | 64      | 2    | 31   |
|     |   |   |         |   |   | MGAT2    | mannosyl (alpha-1,6-)-glycoprotein b-1,2-N-acetylglucosaminyltransferase | -2                 | 2   | 2   | 35      | 1    | 26   |
|     |   |   |         |   |   | BTN3A2   | butyrophilin, subfamily 3, member A2                                     | 2                  | 1   | 3   | -31     | -74  | 2    |
|     |   |   |         |   |   | C4B      | complement component 4B (Chido blood group)                              | -1                 | 1   | 2   | 112     | 2    | 52   |
|     |   |   |         |   |   | CPEB2    | cytoplasmic polyadenylation element binding protein 2                    | -2                 | 1   | 1   | -46     | -31  | -1   |
|     |   |   |         |   |   | CYTIP    | cytohesin 1 interacting protein                                          | -1                 | 1   | 2   | -126    | -68  | -2   |
|     |   |   |         |   |   | LGALS3   | lectin, galactoside-binding, soluble, 3                                  | -2                 | 1   | 1   | -6      | -6   | 1    |
|     |   |   |         |   |   | GPR4     | G protein-coupled receptor 4                                             | 1                  | 1   | 2   | 62      | 2    | 27   |
|     |   |   |         |   |   | ACYP2    | acylphosphatase 2, muscle type                                           | 1                  | 1   | 2   | 11      | -5   | 55   |

RMA log<sub>2</sub>

-5x      5x

TMM log<sub>2</sub>

0      12

**Fig. S3.** Syncytiotrophoblast (**S**), Cytotrophoblast (**C**), and Endovascular trophoblast (**E**) coordinately differentially expressed genes and proteins

**Table S1. Antibodies**

| Antigen                                   | Catalog number/<br>clone | Source                 | Species | Concentration<br>( $\mu\text{g/ml}$ ) |
|-------------------------------------------|--------------------------|------------------------|---------|---------------------------------------|
| NTS                                       | ab172114                 | Abcam                  | Rabbit  | 10                                    |
| C4ORF36                                   | ab23703                  | Abcam                  | Rabbit  | 2                                     |
| PGPEP1                                    | ab220735                 | Abcam                  | Rabbit  | 0.5                                   |
| CNR1                                      | ab23703                  | Abcam                  | Rabbit  | 4                                     |
| CK7                                       | 7D3                      | Damsky et al., 1992    | Rat     | 26                                    |
| FITC-conjugated anti-<br>mouse secondary  | 715-095-151              | Jackson ImmunoResearch | Donkey  | 15                                    |
| FITC-conjugated anti-<br>rabbit secondary | 711-095-152              | Jackson ImmunoResearch | Donkey  | 15                                    |
| TRITC-conjugated<br>anti-rat secondary    | 712-025-153              | Jackson ImmunoResearch | Donkey  | 15                                    |

**Table S2. Cannabinoid Receptor Agonists and Antagonists**

| Compound               | CAS Registry No | Tocris Cat. No. | Target                              |
|------------------------|-----------------|-----------------|-------------------------------------|
| (R)-(+)-Methanandamide | 157182-49-5     | 1782            | CB <sub>1</sub> Agonist             |
| AM 251                 | 183232-66-8     | 1117            | CB <sub>1</sub> Receptor Antagonist |
| JWH 133                | 259869-55-1     | 1343            | CB <sub>2</sub> Agonist             |
| AM 630                 | 164178-33-0     | 1120            | CB <sub>2</sub> Inverse Agonist     |
